# Supplementary material for: A de novo evolved gene in the house mouse regulates female pregnancy cycles
Source: eLife. 2019 Aug 22;8:e44392. doi: 10.7554/eLife.44392 (PMC6760900; doi:10.7554/eLife.44392)
Supplement: Figure 1—source data 1. [file elife-44392-fig1-data1.xlsx]

## Sheet: legends of gene list
Column code	Column name	Note
B	Protein_ID	Protein IDs given by Ensembl. Protein IDs representing identical open reading frames are shown together.
C	Transcript_ID	Transcript IDs given by Ensembl and Stringtie which assembles transcripts based on ENCODE RNA-Seq data. Assembled transcripts in gtf format can be found in the tab "reassembled transcripts".
D	Gene_ID	Gene ID given by Ensembl.
E	Location
F	Strand
G	Coding_exon_number	Including the exon only contain stop codon.
H	Exon_number	The exon number of the isoform highest expressed among all isoforms of the gene.
I	Protein_length
J	ISD	Average intrinsic structural disorder score calculated by IUPred.
K	Hydrophobic_clusters	Fraction of sequence covered by hydrophobic clusters predicted by SEG-HCA.
L	Proteomics	Proteomics evidence. "YES" means detected and "NO" means non-detected. Detail can be found in the tab "detail of proteomic evidence".
M	Source	Biological source of the proteomics evidence. Detail can be found in the tab "detail of proteomic evidence".
Columns N to U show the ribosome profiling translational signals reported by RiboTaper. "YES" means detected and "NO" means non-detected.
Column code	Column name
N	Brain
O	Hippocampus
P	Neural_ES_cells
Q	Heart
R	Skeletal_muscle
S	Neutrophils
T	Splenic_B_cells
U	Testis
Columns V to BD are the FPKM values caculated with Stringtie from ENCODE RNA-Seq data.
Column code	Column name	Tissue	Developmental stage	Library made from
V	CNS_e_11.5d_pA	Central nervous system	Embryonic 11.5-day	polyA RNA-Seq
W	CNS_e_14d_pA	Central nervous system	Embryonic 14-day	polyA RNA-Seq
X	CNS_e_18d_pA	Central nervous system	Embryonic 18-day	polyA RNA-Seq
Y	Brain_e_14.5d_pA	Brain	Embryonic 14.5-day	polyA RNA-Seq
Z	Liver_e_14d_pA	Liver	Embryonic 14-day	polyA RNA-Seq
AA	Liver_e_14.5d_pA	Liver	Embryonic 14.5-day	polyA RNA-Seq
AB	Liver_e_18d_pA	Liver	Embryonic 18-day	polyA RNA-Seq
AC	Limb_e_14.5d_pA	Limb	Embryonic 14.5-day	polyA RNA-Seq
AD	Forebrain_p_0d_RNA	Forebrain	Postnatal 0-day	total RNA-Seq
AE	Midbrain_p_0d_RNA	Midbrain	Postnatal 0-day	total RNA-Seq
AF	Hindbrain_p_0d_RNA	Hindbrain	Postnatal 0-day	total RNA-Seq
AG	Heart_p_0d_RNA	Heart	Postnatal 0-day	total RNA-Seq
AH	CorticalPlate_a_8w_pA	Cortical plate	Adult 8-week	polyA RNA-Seq
AI	FrontalCortex_a_8w_pA	Frontal cortex	Adult 8-week	polyA RNA-Seq
AJ	Cerebellum_a_8w_pA	Cerebellum	Adult 8-week	polyA RNA-Seq
AK	Lung_a_8w_pA	Lung	Adult 8-week	polyA RNA-Seq
AL	Thymus_a_8w_pA	Thymus	Adult 8-week	polyA RNA-Seq
AM	Spleen_a_8w_pA	Spleen	Adult 8-week	polyA RNA-Seq
AN	Heart_a_8w_pA	Heart	Adult 8-week	polyA RNA-Seq
AO	Stomach_a_8w_pA	Stomach	Adult 8-week	polyA RNA-Seq
AP	SmallIntestine_a_8w_pA	Small intestine	Adult 8-week	polyA RNA-Seq
AQ	Duodenum_a_8w_pA	Duodenum	Adult 8-week	polyA RNA-Seq
AR	LargeIntestine_a_8w_pA	Large intestine	Adult 8-week	polyA RNA-Seq
AS	Colon_a_8w_pA	Colon	Adult 8-week	polyA RNA-Seq
AT	Liver_a_8w_pA	Liver	Adult 8-week	polyA RNA-Seq
AU	Liver_a_8w_RNA	Liver	Adult 8-week	total RNA-Seq
AV	Adrenal_a_8w_pA	Adrenal gland	Adult 8-week	polyA RNA-Seq
AW	Kidney_a_8w_pA	Kidney	Adult 8-week	polyA RNA-Seq
AX	Bladder_a_8w_pA	Urinary bladder	Adult 8-week	polyA RNA-Seq
AY	Mammary_a_8w_pA	Mammary	Adult 8-week	polyA RNA-Seq
AZ	Placenta_a_8w_pA	Placenta	Adult 8-week	polyA RNA-Seq
BA	Ovary_a_8w_pA	Ovary	Adult 8-week	polyA RNA-Seq
BB	Testis_a_8w_pA	Testis	Adult 8-week	polyA RNA-Seq
BC	GonadalFatPad_a_8w_pA	Gonadal fat pad	Adult 8-week	polyA RNA-Seq
BD	SubcutaneousAdipose_a_8w_pA	Subcutaneous adipose	Adult 8-week	polyA RNA-Seq
Column code	Column name
BE	Protein_sequence

## Sheet: gene list
											proteomic evidence		ribosome profiling evidence								FPKM values in different tissues and stages
	Protein_ID	Transcript_ID	Gene_ID	Location	Strand	Coding exon number	Exon number	Protein length	ISD	Hydrophobic clusters	Proteomics	Source	Brain	Hippocampus	Neural_ES_cells	Heart	Skeletal_muscle	Neutrophils	Splenic_B_cells	Testis	CNS_e_11.5d_pA	CNS_e_14d_pA	CNS_e_18d_pA	Brain_e_14.5d_pA	Liver_e_14d_pA	Liver_e_14.5d_pA	Liver_e_18d_pA	Limb_e_14.5d_pA	Forebrain_p_0d_RNA	Midbrain_p_0d_RNA	Hindbrain_p_0d_RNA	Heart_p_0d_RNA	CorticalPlate_a_8w_pA	FrontalCortex_a_8w_pA	Cerebellum_a_8w_pA	Lung_a_8w_pA	Thymus_a_8w_pA	Spleen_a_8w_pA	Heart_a_8w_pA	Stomach_a_8w_pA	SmallIntestine_a_8w_pA	Duodenum_a_8w_pA	LargeIntestine_a_8w_pA	Colon_a_8w_pA	Liver_a_8w_pA	Liver_a_8w_RNA	Adrenal_a_8w_pA	Kidney_a_8w_pA	Bladder_a_8w_pA
	ENSMUSP00000024896	ENSMUST00000024896	ENSMUSG00000024088	chr17:64832702-64834606	-	3	4	102	0.2895	0.4608	YES	cerebral cortex	NO	NO	NO	NO	NO	NO	NO	NO	0	0	0	0.007	0	0	0	0	0	0	0	0	0	0	0	0	0	0	0	0	0	0	0	0	0	0	0	0	0.006
	ENSMUSP00000027102	ENSMUST00000027102	ENSMUSG00000025961	chr1:63756099-63769205	-	3	3	167	0.3576	0.5449	YES	cerebral cortex	NO	NO	NO	NO	NO	NO	NO	NO	0.019	0.006	0.031	0.036	0	0	0	0.013	0.108	0	0	0	0.059	0.046	0.04	0	0	0	0	0	0	0	0	0	0	0	0	0	0
	ENSMUSP00000028069	ENSMUST00000028069|MSTRG.151059.1	ENSMUSG00000026736	chr2:18998541-18998912	+	1	1	123	0.2074	0.4065	YES	cerebral cortex	NO	YES	NO	NO	NO	NO	NO	NO	0.219	0.298	0.284	0.286	0.38	0.346	0.281	0.292	0.119	0.28	0.408	0.009	0.531	0.62	0.376	0.255	1.204	0.695	0.103	0.378	0.129	0.134	0.505	0.284	0.05	0.006	0.171	0.245	0.862
	ENSMUSP00000029268	ENSMUST00000029268|MSTRG.175533.1	ENSMUSG00000027713	chr3:36476135-36481976	+	3	3	129	0.3891	0.4186	YES	cerebral cortex	NO	NO	NO	NO	NO	NO	NO	NO	0.061	0.04	0.005	0.098	0.002	0.067	0.243	0.238	0	0	0	0.832	0	0.102	0	0.33	0	0	0	0	0	0	0.018	0.035	0	0.121	0.023	0.048	0.075
	ENSMUSP00000031330	ENSMUST00000031330	ENSMUSG00000029384	chr5:93206680-93213448	+	3	3	119	0.1614	0.6555	YES	cerebral cortex	NO	NO	NO	NO	NO	NO	NO	NO	0.415	0.2	0.052	0.155	0.245	0.393	0.29	0.15	0.111	0.121	0.038	0	0.068	0.106	0.248	0.046	0.036	0.063	0	0	0	0	0	0	0.02	0.049	0.011	0.047	0.18
	ENSMUSP00000040998	ENSMUST00000043553|MSTRG.241163.1|MSTRG.241163.2|MSTRG.241163.3|MSTRG.241163.4|MSTRG.241163.5	ENSMUSG00000040657	chr6:122392043-122392351	+	1	2	102	0.7423	0.2745	YES	cerebral cortex	NO	NO	NO	NO	NO	NO	NO	NO	0.007	0.002	0	0.004	0.101	0.026	0.054	0.007	0	0	0	0	0.003	0	0.006	0	0	0.005	0	0	0	0	0	0	0	0	0	0.006	0.003
	ENSMUSP00000042930	ENSMUST00000036821	ENSMUSG00000041512	chr5:116821525-116821833	+	1	1	102	0.4404	0.4706	YES	cerebral cortex; erythroid lineage cell	NO	NO	NO	NO	NO	NO	NO	NO	0	0	0	0	0	0	0	0	0	0	0	0	0	0	0	0	0	0	0	0	0	0	0	0	0	0	0	0	0
	ENSMUSP00000043464	ENSMUST00000048606	ENSMUSG00000040467	chr8:8663232-8663540	+	1	2	102	0.1201	0.5392	YES	NA	NO	NO	NO	NO	NO	NO	NO	NO	0	0	0.007	0	0	0	0	0.002	0	0	0	0	0	0	0	0	0	0	0	0	0	0	0	0	0	0	0	0	0
	ENSMUSP00000049734	ENSMUST00000056140|MSTRG.66555.1|MSTRG.66555.2	ENSMUSG00000055271	chr12:103407201-103407611	-	1	1	136	0.1513	0.6912	YES	cerebral cortex	NO	NO	NO	NO	NO	NO	NO	NO	0.353	0.233	0.288	0.303	0.173	0.159	0.074	0.151	0.806	1.491	0.708	0.417	0.097	0.226	0.446	0.354	0.451	0.482	0.215	0.826	1.445	1.12	0.265	0.156	0.055	0.079	0.251	0.301	0.118
	ENSMUSP00000050112	ENSMUST00000050921|MSTRG.270136.1	ENSMUSG00000020887	chr8:70863577-70864113	+	1	1	178	0.3282	0.4157	YES	cerebral cortex	NO	NO	NO	NO	NO	NO	NO	NO	0.516	0.509	0.329	0.521	0.002	0	0	0.076	0.394	0.206	0.168	0.115	0.233	0.195	0.147	0.004	0.03	0.005	0.016	0	0	0	0	0	0	0	0	0.019	0.009
	ENSMUSP00000050697	ENSMUST00000062355	ENSMUSG00000043583	chr2:170579491-170601163	-	2	2	155	0.2349	0.4129	YES	cerebral cortex	NO	NO	NO	NO	NO	NO	NO	NO	0	0	0.007	0	0	0	0	0	0	0	0	0	0	0.011	0	0	0	0	0	0	0	0	0	0	0	0	0	0	0
	ENSMUSP00000051312	ENSMUST00000059598|MSTRG.80194.1	ENSMUSG00000042857	chr13:94358454-94358765	-	1	1	103	0.1158	0.5243	YES	NA	NO	YES	NO	NO	NO	NO	NO	NO	1.054	1.177	1.29	1.267	0.589	0.658	0.521	2.36	0.375	1.083	0.586	0.118	0.994	1.151	1.032	1.125	0.992	0.647	0.394	0.693	0.483	0.605	0.992	1.039	0.599	0.158	0.915	0.878	1.703
	ENSMUSP00000052388	ENSMUST00000053318	ENSMUSG00000049349	chr3:138049485-138052573	-	2	4	112	0.1019	0.5446	YES	cerebral cortex	NO	NO	NO	NO	NO	NO	NO	NO	0.023	0	0.015	0	0.01	0.005	0	0.059	0.008	0	0	0.159	0.091	0.044	0.036	0.069	0.003	0	0.749	0	0.132	0.125	0.161	0	0	0	0	0.003	0.002
	ENSMUSP00000052460	ENSMUST00000058918|MSTRG.262868.2	ENSMUSG00000048484	chr8:4677564-4677989	-	1	1	141	0.5827	0.305	YES	cerebral cortex	NO	NO	NO	NO	NO	NO	NO	NO	0.223	0.143	0.104	0.12	0.065	0.078	0.019	0.106	0.339	0.11	0.16	0.306	0.039	0.05	0.065	0.031	0.04	0.077	0.02	0.019	0.027	0.076	0.124	0.072	0.021	0.082	0.003	0.075	0.048
	ENSMUSP00000052846	ENSMUST00000057722	ENSMUSG00000049427	chr11:53470005-53470385	-	1	1	126	0.0814	0.6032	YES	cerebral cortex; erythroid lineage cell	NO	NO	NO	NO	NO	NO	NO	NO	0	0	0	0	0	0	0	0	0.158	0	0	0	0	0.003	0	0	0	0	0.011	0	0	0	0	0	0	0	0	0	0
	ENSMUSP00000054793	ENSMUST00000056401	ENSMUSG00000051237	chr15:25138789-25139124	-	1	3	111	0.0268	0.7838	YES	cerebral cortex	NO	NO	NO	NO	NO	NO	NO	NO	0	0.008	0.002	0.002	0	0	0.005	0	0.007	0	0	0	0.005	0	0.004	0	0	0	0	0	0	0	0	0	0	0	0	0	0.002
	ENSMUSP00000057719	ENSMUST00000050754	ENSMUSG00000047828	chr12:112414976-112415698	-	1	3	240	0.1145	0.575	YES	cerebral cortex	NO	NO	NO	NO	NO	NO	NO	NO	0.011	0.043	0.326	0.085	0	0	0	0	0.031	0	0.061	0	0.078	0.056	0.032	0	0.003	0	0	0	0	0	0	0	0	0	0	0	0
	ENSMUSP00000058311	ENSMUST00000061679|MSTRG.59171.30|MSTRG.59171.68	ENSMUSG00000052376	chr12:34874076-34874516	-	1	1	146	0.0524	0.6233	YES	NA	NO	NO	NO	NO	NO	NO	NO	NO	0.009	0.039	0.035	0.023	0	0.006	0.003	0.043	0.057	0.087	0.034	0	0.112	0.142	0.034	0.004	0.012	0.02	0	0	0	0	0	0	0	0.006	0	0	0.004
	ENSMUSP00000059458	ENSMUST00000056994|MSTRG.36806.1	ENSMUSG00000044544	chr10:120778490-120778831	+	1	3	113	0.192	0.531	YES	cerebral cortex	NO	NO	NO	NO	NO	NO	NO	NO	0.005	0	0	0	0	0.011	0.012	0	0	0	0	0	0	0	0	0.006	0.008	0.005	0	0	0	0	0	0	0	0	0	0	0
	ENSMUSP00000061176	ENSMUST00000059351	ENSMUSG00000048544	chr8:33429154-33429525	+	1	1	123	0.0093	0.7724	YES	NA	NO	NO	NO	NO	NO	NO	NO	NO	0.315	0.047	0.028	0.053	0.071	0.082	0.037	0.03	0.059	0.136	0.073	0.013	0.041	0.034	0.05	0.022	0.007	0.008	0.057	0.037	0	0	0.038	0.018	0.015	0.032	0	0.039	0.047
	ENSMUSP00000061324	ENSMUST00000056170|MSTRG.160928.14	ENSMUSG00000046085	chr2:103992595-104027223	-	4	15	113	0.255	0.6903	YES	cerebral cortex	NO	NO	NO	NO	NO	NO	NO	NO	0.052	0.044	0.074	0.007	0.091	0.071	0.047	0.001	0	0	0.003	0	0.004	0.039	0.003	0	0	0	0	0	0	0	0.006	0	0.003	0.012	0	0.007	0.027
	ENSMUSP00000062657	ENSMUST00000056256	ENSMUSG00000045877	chr11:43587301-43587606	+	1	1	101	0.0205	0.7822	NO	NA	NO	NO	NO	NO	NO	NO	NO	NO	1.338	0.508	0.206	0.393	0.147	0.135	0.149	0.33	0.34	0.221	0.179	0.169	0.153	0.15	0.574	0.174	0.317	0.031	0.112	0.105	0.367	0.429	0.663	0.175	0	0.002	0.096	0.13	0.294
	ENSMUSP00000062888	ENSMUST00000055404	ENSMUSG00000045065	chr11:109414027-109418196	+	2	2	128	0.5176	0.3828	YES	cerebral cortex	NO	NO	NO	NO	NO	NO	NO	NO	0.005	0.012	0.006	0.008	0	0	0	0.009	0	0.005	0	0	0.016	0.011	0.006	0.004	0.008	0.002	0	0	0	0	0.011	0	0	0	0	0	0.001
	ENSMUSP00000063224	ENSMUST00000070258	ENSMUSG00000056257	chr13:30974295-30974642	+	1	1	115	0.508	0.4348	YES	NA	NO	NO	NO	NO	NO	NO	NO	NO	0.077	0.022	0.016	0.024	0.012	0.004	0.007	0.018	0	0.018	0.11	0	0.016	0.031	0.04	0.01	0.012	0	0	0	0.014	0	0	0.009	0.029	0.017	0.005	0.027	0.06
	ENSMUSP00000063883	ENSMUST00000067625	ENSMUSG00000062310	chr1:88501123-88509886	-	3	3	174	0.9281	0.1782	YES	NA	NO	NO	NO	NO	NO	NO	NO	NO	0	0	0	0	0.088	0.015	0.007	0	0	0	0	0	0.003	0.03	0.004	0	0.001	0	0	0	0	0	0	0	0	0	0	0	0
	ENSMUSP00000063892	ENSMUST00000068448	ENSMUSG00000055072	chr11:79296185-79296619	-	1	1	144	0.1827	0.6111	YES	cerebral cortex	NO	NO	NO	NO	NO	NO	NO	NO	0	0	0	0.003	0	0	0	0	0	0	0	0	0	0	0	0	0	0	0	0	0	0	0	0	0	0	0	0	0
	ENSMUSP00000065182	ENSMUST00000071067|MSTRG.271722.1|MSTRG.271722.3|MSTRG.271722.6	ENSMUSG00000056753	chr8:84066113-84066598	-	1	2	161	0.4659	0.3727	YES	cerebral cortex	NO	YES	NO	NO	NO	NO	NO	NO	0.266	0.078	0.043	0.153	0.039	0.15	0.187	0.176	1.03	0	0.638	0.052	0.166	0.192	0.002	0.274	0.192	0.226	0.282	0.02	0.091	0.126	0.098	0.056	0	0.041	0.229	0.114	0.216
	ENSMUSP00000065299	ENSMUST00000068836	ENSMUSG00000055323	chr7:126775757-126776101	-	1	1	114	0.1566	0.6053	YES	skin	NO	NO	NO	NO	NO	NO	NO	NO	0.163	0.175	0.1	0.132	0.064	0.03	0.053	0.276	0.235	0.189	0.206	0.521	0.056	0.081	0.078	0.086	0.08	0.176	0.083	0.039	0.062	0.02	0.057	0.044	0.036	0.103	0.015	0.104	0.37
	ENSMUSP00000065375	ENSMUST00000070021	ENSMUSG00000056106	chr7:97720946-97721350	+	1	1	134	0.1013	0.6194	YES	cerebral cortex	NO	NO	NO	NO	NO	NO	NO	NO	0.194	0.084	0.091	0.084	0.022	0.025	0.025	0.086	0.263	0.177	0.138	0	0.071	0.107	0.158	0.035	0.108	0.02	0.027	0	0.031	0	0.027	0.025	0.019	0.112	0	0.01	0.062
	ENSMUSP00000065580	ENSMUST00000067007	ENSMUSG00000054156	chr9:49268572-49278783	+	3	3	118	0.3424	0.5085	YES	cerebral cortex	NO	NO	NO	NO	NO	NO	NO	NO	0	0.005	0	0	0	0	0	0	0	0	0	0	0	0	0	0	0.055	0	0	0	0	0	0	0	0	0	0	0	0
	ENSMUSP00000065695	ENSMUST00000066005|MSTRG.254461.2	ENSMUSG00000053528	chr7:83148644-83155922	+	4	4	137	0.4417	0.438	YES	cerebral cortex	NO	NO	NO	NO	NO	NO	NO	NO	0.076	0	0.002	0	0	0	0	0.045	0	0	0	0	0.019	0.078	0	0.082	0.296	0.254	0	0	0	0	0	0	0	0	0	0	0
	ENSMUSP00000066378	ENSMUST00000066163|MSTRG.150961.2	ENSMUSG00000054057	chr2:18026832-18027305	-	1	3	157	0.0529	0.758	YES	cerebral cortex	NO	YES	YES	NO	NO	NO	NO	NO	1.88	1.974	0.592	1.252	0.294	0.245	0.207	3.043	0.58	0.493	0.617	0.681	0.229	0.26	0.633	0.808	0.078	0.178	0.544	0.322	0.065	0.098	0.076	0.099	0.221	0.349	0.184	0.404	0.739
	ENSMUSP00000066655	ENSMUST00000069035	ENSMUSG00000055446	chr7:98543597-98562889	-	2	2	149	0.2554	0.4899	YES	NA	NO	NO	NO	NO	NO	NO	NO	NO	0	0	0	0.005	0.003	0	0	0	0	0	0	0	0	0	0	0	0.464	0	0	0	0	0	0	0	0	0	0	0.006	0
	ENSMUSP00000067622	ENSMUST00000068250	ENSMUSG00000054945	chr5:90367844-90368164	+	1	1	106	0.0594	0.6509	YES	NA	NO	NO	NO	NO	NO	NO	NO	NO	1.517	1.694	0.924	1.238	1.244	1.584	1.233	1.569	0.354	0.281	0.296	0.053	0.614	0.725	0.963	0.639	0.878	0.597	0.355	0.354	0.155	0.135	1.017	0.403	0.458	0.453	0.488	0.883	1.591
	ENSMUSP00000068009	ENSMUST00000067523|MSTRG.44361.5|MSTRG.44361.6	ENSMUSG00000054450	chr11:53480299-53480574	+	1	3	91	0.0143	0.8681	YES	cerebral cortex	NO	NO	NO	NO	NO	NO	NO	NO	0.015	0.066	0.031	0.057	0.122	0.28	0.151	0.004	0.169	0.036	0.094	0	0.122	0.448	0.521	0	0	0.055	0	0.019	0.026	0	0.092	0	0	0.009	0	0.004	0.137
	ENSMUSP00000068101	ENSMUST00000065826	ENSMUSG00000053420	chr10:94293687-94298506	-	3	3	183	0.1323	0.4809	YES	cerebral cortex	NO	NO	NO	NO	NO	NO	NO	NO	0.021	0.051	0.129	0.065	0	0	0	0.042	0.009	0.041	0.205	0	0.007	0.019	0.043	0	0	0	0	0.513	0	0	0	0.002	0	0	0.002	0	0.081
	ENSMUSP00000068236	ENSMUST00000068783	ENSMUSG00000052471	chr16:91170199-91170834	-	1	1	211	0.1003	0.5972	YES	cerebral cortex	NO	NO	NO	NO	NO	NO	NO	NO	0.008	0.004	0.029	0.012	0	0	0	0.003	0.051	0.063	0.096	0	0.04	0.062	0.079	0	0	0	0.005	0	0	0	0	0	0	0	0.005	0	0.005
	ENSMUSP00000068675	ENSMUST00000066742	ENSMUSG00000053980	chr10:9534539-9534979	-	1	1	146	0.0977	0.6986	YES	cerebral cortex	NO	NO	NO	NO	NO	NO	NO	NO	0.283	0.391	0.335	0.649	0.023	0.019	0.018	0.205	0.413	0.889	0.256	0.083	0.28	0.162	0.071	0.023	0.021	0	0	0	0.013	0	0.003	0.003	0	0.059	0.005	0	0.029
	ENSMUSP00000068924	ENSMUST00000066740	ENSMUSG00000053979	chr8:24184803-24185171	+	1	2	122	0.4242	0.5164	YES	cerebral cortex	NO	NO	NO	NO	NO	NO	NO	NO	0	0	0.004	0	0	0	0	0	0.006	0	0	0	0.021	0.005	0.006	0	0	0	0	0	0	0	0	0	0	0	0	0	0
	ENSMUSP00000069426	ENSMUST00000067077|MSTRG.144290.1|MSTRG.144290.2|MSTRG.144290.4|MSTRG.144290.6	ENSMUSG00000054178	chr19:23724300-23724638	+	1	8	112	0.1254	0.5089	YES	NA	NO	NO	NO	NO	NO	NO	NO	NO	0.078	0.111	0.153	0.14	0.158	0.352	0.066	0.126	0.516	1.308	2.695	1.175	0.114	0.219	0.292	0.883	0.632	0.419	0.373	0.14	0.241	0.16	0.252	0.405	0.292	0.797	0.312	0.396	0.307
	ENSMUSP00000069776	ENSMUST00000066875	ENSMUSG00000054069	chr8:106500522-106507342	+	3	3	222	0.4947	0.4144	YES	cerebral cortex	NO	NO	NO	NO	NO	NO	NO	NO	0	0	0	0	0	0	0	0	0	0	0.038	0	0	0	0	0	0	0.028	0	0	0	0	0	0.082	0	0	0	0	0
	ENSMUSP00000069906	ENSMUST00000067176	ENSMUSG00000054258	chr13:41656012-41656428	+	1	1	138	0.0435	0.6957	YES	cerebral cortex	NO	NO	NO	NO	NO	NO	NO	NO	0.099	0.023	0.021	0.037	0.018	0.041	0.02	0.055	0.071	0.138	0	0	0.012	0.011	0.016	0.118	0.033	0.27	0	0.024	0.07	0.017	0.019	0	0	0.004	0	0.018	0.009
	ENSMUSP00000069912	ENSMUST00000065465	ENSMUSG00000053181	chr13:48514224-48514727	+	1	2	167	0.7141	0.2994	YES	cerebral cortex	NO	YES	NO	NO	NO	NO	NO	NO	0.536	0.541	0.63	0.611	0.221	0.194	0.065	0.382	0.241	0.178	0.248	0	0.465	0.376	0.533	0	0.047	0.012	0.027	0	0	0	0.045	0	0	0.065	0	0	0.13
	ENSMUSP00000070493	ENSMUST00000065956	ENSMUSG00000053499	chr13:4771660-4834377	+	3	3	116	0.0778	0.5948	YES	NA	NO	NO	NO	NO	NO	NO	NO	NO	0	0	0	0	0	0	0	0	0	0	0	0	0	0	0	0	0	0	0	0	0	0	0	0	0	0	0	0	0
	ENSMUSP00000070801	ENSMUST00000068485	ENSMUSG00000055099	chr7:95958474-95958875	+	1	1	133	0.054	0.6842	YES	cerebral cortex	NO	NO	NO	NO	NO	NO	NO	NO	0.001	0.012	0.016	0.017	0	0	0	0.001	0.024	0.086	0.022	0	0.005	0.017	0.015	0	0	0	0	0	0	0	0	0	0	0	0	0	0
	ENSMUSP00000071022	ENSMUST00000069051	ENSMUSG00000055456	chr11:43036528-43036836	+	1	1	102	0.1589	0.5588	YES	NA	NO	NO	NO	NO	NO	NO	NO	NO	0	0	0	0	0	0	0	0.01	0	0	0	0	0.012	0	0.01	0	0.001	0	0	0.006	0	0	0	0	0	0	0	0.006	0.081
	ENSMUSP00000071080	ENSMUST00000067972	ENSMUSG00000054758	chr10:56745244-56745639	+	1	1	131	0.0207	0.6794	YES	cerebral cortex; erythroid lineage cell	NO	NO	NO	NO	NO	NO	NO	NO	0	0.002	0.004	0	0	0.003	0	0.007	0.011	0.002	0	0	0.003	0.006	0.009	0.018	0	0	0.04	0.007	0.004	0	0.01	0.009	0	0.002	0	0.002	0.004
	ENSMUSP00000071235	ENSMUST00000071254|MSTRG.279011.17	ENSMUSG00000031802	chr9:13431514-13431801	+	1	4	95	0.0218	0.8211	YES	NA	NO	NO	NO	NO	NO	NO	NO	NO	0.546	0.381	0.324	0.472	0.083	0.073	0.08	0.485	0.431	0.869	1.001	1.035	0.261	0.418	0.964	0.524	0.698	0.616	0.168	0.287	0.292	0.157	0.088	0.177	0.098	0.367	0.258	0.176	0.666
	ENSMUSP00000071453	ENSMUST00000071522	ENSMUSG00000057913	chr14:66792423-66792803	+	1	2	126	0.2233	0.6587	YES	NA	NO	NO	NO	NO	NO	NO	NO	NO	0	0.005	0.009	0.006	0.005	0	0.026	0	0	0	0	0	0.011	0.04	0.011	0.126	0.305	0	0.158	0	0	0	0	0	0	0.035	0.433	0.464	0.019
	ENSMUSP00000071973	ENSMUST00000072100|MSTRG.63146.1|MSTRG.63146.3|MSTRG.63146.4	ENSMUSG00000029878	chr12:74298803-74299189	+	1	1	128	0.5955	0.2969	NO	NA	NO	NO	NO	NO	NO	NO	NO	NO	0.104	0.646	3.566	0.881	0	0.005	0.002	0.024	10.711	1.943	2.959	0.018	10.579	10.782	0.575	0.005	0.003	0.003	0.004	0.049	0.033	0.055	0.032	0.028	0	0.007	0.248	0.005	0.025
	ENSMUSP00000072263	ENSMUST00000072437|MSTRG.74363.2	ENSMUSG00000062282	chr13:46177442-46177771	-	1	2	109	0.0431	0.6514	YES	cerebral cortex	NO	NO	NO	NO	NO	NO	NO	NO	0.001	0.001	0.002	0	0	0	0	0.004	0.003	0.008	0	0	0	0.001	0	0	0	0	0.002	0.003	0	0.005	0.011	0.002	0	0	0	0.002	0.111
	ENSMUSP00000072830	ENSMUST00000073081	ENSMUSG00000057047	chr2:173719900-173721984	+	3	3	102	0.3276	0.5196	YES	cerebral cortex	NO	NO	NO	NO	NO	NO	NO	NO	0	0.021	0.005	0.021	0.001	0	0	0.002	0	0	0	0	0.007	0	0	0.021	0.015	0	0.008	0	0	0	0	0	0	0.006	0	0.034	0.004
	ENSMUSP00000078054	ENSMUST00000079045|MSTRG.260115.1	ENSMUSG00000063254	chr7:127985324-127985692	+	1	1	122	0.013	0.8197	YES	NA	NO	NO	NO	NO	NO	NO	NO	NO	1.712	1.216	1.035	1.147	0.582	0.551	0.344	1.489	0.553	1.203	0.733	1.263	0.825	0.912	1.477	0.602	0.469	0.257	0.475	0.104	0.28	0.118	0.257	0.374	0.103	0.623	0.046	0.248	0.739
	ENSMUSP00000078183	ENSMUST00000079186	ENSMUSG00000060416	chr6:89212250-89212621	-	1	3	123	0.334	0.6098	YES	NA	NO	NO	NO	NO	NO	NO	NO	NO	0	0.002	0.01	0.004	0	0	0	0	0.009	0	0.013	0	0.003	0	0.008	0	0	0	0	0	0	0	0	0	0.124	0.04	0	0	0.005
	ENSMUSP00000081703	ENSMUST00000084653|MSTRG.44353.3|MSTRG.44353.4	ENSMUSG00000072963	chr11:53456293-53456700	-	1	1	135	0.0351	0.7407	YES	NA	NO	NO	NO	NO	NO	NO	NO	NO	0.07	0.066	0.045	0.032	0.113	0.17	0.383	0.179	0.015	0	0	0	0.028	0.036	0.02	0.133	0.023	0.016	0	0.228	0.026	0.084	0.05	0.087	1.23	0.236	0.043	0.036	0.66
	ENSMUSP00000083879	ENSMUST00000086675|MSTRG.125365.7|MSTRG.125365.8	ENSMUSG00000073388	chr17:46889795-46890205	-	1	13	136	0.314	0.4265	YES	brain; cerebral cortex	NO	NO	NO	NO	NO	NO	NO	NO	0.272	0.594	0.503	0.641	0.245	0.216	0.012	1.072	1.284	0.811	0.177	0	1.432	3.21	0.986	0.31	0.459	0.693	0.094	0.102	0.225	0.301	0.291	0.328	0.116	0.74	0.286	0.249	1.06
	ENSMUSP00000087703	ENSMUST00000090237	ENSMUSG00000068601	chr6:39420568-39420867	+	2	2	70	0.1659	0.5857	YES	NA	NO	NO	NO	NO	NO	NO	NO	NO	0.509	0.577	0.57	0.883	0.305	0.32	0.319	0.202	0.143	0.344	0.118	0	0.266	0.501	0.448	0.155	0.25	0.303	0.025	0.196	0.409	0.448	0.266	0.619	0	0	0.385	0.273	0.208
	ENSMUSP00000088938	ENSMUST00000091377	ENSMUSG00000052075	chr13:97022451-97034265	-	3	3	147	0.6145	0.3265	YES	cerebral cortex	NO	NO	NO	NO	NO	NO	NO	NO	0	0	0	0	0	0	0	0	0	0	0	0	0	0	0	0	0.921	0	0.123	0.025	0.018	0	0	0	0	0	0.14	0.056	0.014
	ENSMUSP00000090049	ENSMUST00000092394|MSTRG.54322.1	ENSMUSG00000069588	chr11:117484427-117487140	+	3	4	125	0.2013	0.456	YES	cerebral cortex	NO	NO	NO	NO	NO	NO	NO	NO	0.01	0.032	0.046	0.06	0	0	0.002	0.01	0.059	0.067	0.01	0	0.063	0.082	0.034	0	0.014	0	0.035	0	0	0	0.003	0.009	0	0	0	0.005	0.016
	ENSMUSP00000090351	ENSMUST00000092680|MSTRG.24685.2	ENSMUSG00000069713	chr10:20311066-20311392	-	1	1	108	0.1748	0.6019	YES	cerebral cortex; erythroid lineage cell	NO	NO	NO	NO	NO	NO	NO	NO	0.522	0.444	0.386	0.488	0.288	0.271	0.188	0.394	0.532	0.328	0.637	0.668	0.189	0.184	0.136	0.228	0.269	0.182	0.247	0.066	0.084	0.121	0.243	0.267	0.049	0.121	0.237	0.344	0.473
	ENSMUSP00000091206	ENSMUST00000093494	ENSMUSG00000070023	chr8:60430024-60503198	-	3	3	117	0.0243	0.7436	YES	cerebral cortex	NO	NO	NO	NO	NO	NO	NO	NO	0	0	0	0	0	0	0	0	0	0	0	0	0	0	0	0	0	0	0	0	0	0	0	0	0	0	0	0.185	0
	ENSMUSP00000091246	ENSMUST00000093527	ENSMUSG00000074029	chr9:119160629-119161129	+	1	1	166	0.3377	0.494	YES	cerebral cortex	NO	NO	NO	NO	NO	NO	NO	NO	0.003	0.004	0.005	0.007	0.005	0.002	0.006	0.01	0.005	0.001	0	0	0.003	0	0	0	0.008	0	0	0	0	0.009	0	0.004	0.007	0.024	0	0.009	0.027
	ENSMUSP00000091873	ENSMUST00000094315	ENSMUSG00000070511	chr7:71350486-71350830	-	1	1	114	0.136	0.614	YES	NA	NO	NO	NO	NO	NO	NO	NO	NO	0.001	0.002	0	0.003	0	0	0	0.001	0	0.002	0.005	0	0.001	0.004	0.003	0	0.002	0.002	0	0	0	0.002	0	0	0.001	0	0	0.001	0
	ENSMUSP00000093111	ENSMUST00000095459|MSTRG.81756.2|MSTRG.81756.21|MSTRG.81756.22|MSTRG.81756.24|MSTRG.81756.4|MSTRG.81756.5|MSTRG.81756.8	ENSMUSG00000071181	chr13:107032262-107032603	+	1	1	113	0.3809	0.4602	YES	NA	NO	NO	NO	NO	NO	NO	NO	NO	0.252	0.325	0.428	0.365	0.192	0.221	0.199	0.323	0.181	0.107	0.086	0.248	0.184	0.379	0.314	0.287	0.152	0.121	0.179	0.042	0.087	0.055	0.075	0.091	0.029	0.023	0.271	0.126	0.439
	ENSMUSP00000094206	ENSMUST00000069992|MSTRG.98692.1|MSTRG.98692.2|MSTRG.98692.3|MSTRG.98692.4|MSTRG.98692.5|MSTRG.98692.6|MSTRG.98692.7|MSTRG.98692.8	ENSMUSG00000056089	chr15:25414366-25414833	+	1	1	155	0.3217	0.4258	YES	NA	NO	YES	NO	NO	NO	NO	NO	NO	1.721	6.516	9.977	7.84	0.045	0.033	0.005	0.562	8.248	5.296	3.458	0	1.815	1.247	0.134	0.014	0.02	0.01	0	0	0.008	0	0.002	0.002	0.001	0.001	0	0.001	0.086
	ENSMUSP00000095074	ENSMUST00000097466|MSTRG.19208.1|MSTRG.19208.3	ENSMUSG00000073492	chr1:171896124-171896531	+	1	1	135	0.023	0.6815	NO	NA	NO	NO	NO	NO	NO	NO	NO	NO	0.044	0.034	0.022	0.008	0.398	0.452	0.275	0.124	0.018	0.084	0.014	0.022	0.083	0.061	0.032	0.646	4.894	2.338	0.155	0.033	0.174	0.238	0.118	0.077	0.216	0.134	0.085	0.073	0.219
	ENSMUSP00000095548	ENSMUST00000097935	ENSMUSG00000073781	chr7:142831575-142852187	+	4	4	125	0.3004	0.52	YES	cerebral cortex; erythroid lineage cell	NO	NO	NO	NO	NO	NO	NO	NO	0.045	0.033	0.024	0.045	0	0	0	0.013	0.002	0	0	0	0	0	0	0	0	0	0	0	0	0	0	0	0	0	0	0	0
	ENSMUSP00000095577|ENSMUSP00000130110	ENSMUST00000097964|ENSMUST00000168045	ENSMUSG00000073794	chr4:98819815-98820324	-	1	3	169	0.2985	0.5385	YES	cerebral cortex	NO	NO	NO	NO	NO	NO	NO	NO	0	0.006	0	0	0	0	0	0.002	0	0	0	0	0	0.003	0	0.023	0.011	0	0	0	0	0	0	0	0	0	0	0	0
	ENSMUSP00000095596	ENSMUST00000097982	ENSMUSG00000073803	chr7:135397069-135397383	+	1	1	104	0.044	0.7404	YES	cerebral cortex	NO	NO	NO	NO	NO	NO	NO	NO	0.01	0.003	0.001	0.001	0.022	0.017	0.001	0.001	0	0	0	0	0	0	0.003	0	0.005	0	0	0	0	0	0	0	0	0	0	0	0
	ENSMUSP00000095704	ENSMUST00000098100	ENSMUSG00000073862	chr7:113707715-113708200	-	1	1	161	0.0618	0.6398	YES	NA	NO	NO	NO	NO	NO	NO	NO	NO	0.015	0.006	0.018	0	0	0	0	0.059	0	0	0	0	0	0.006	0.078	0	0.023	0	0	0	0	0	0	0	0	0	0	0	0
	ENSMUSP00000096191	ENSMUST00000098592|MSTRG.271722.1|MSTRG.271722.3	ENSMUSG00000074215	chr8:84064148-84064483	-	1	1	111	0.5987	0.3514	YES	cerebral cortex	NO	NO	NO	NO	NO	NO	NO	NO	1.249	1.088	0.957	0.983	0.345	0.092	0.443	0.966	1.159	0.32	0.829	0.686	0.879	1.622	0.691	0.3	0.162	0.18	0.661	0.114	0.152	0.169	0.477	0.255	0.038	0.212	0.217	0.466	0.945
	ENSMUSP00000096212	ENSMUST00000098612	ENSMUSG00000074232	chr9:66798153-66798527	+	1	1	124	0.0606	0.629	YES	cerebral cortex	NO	NO	NO	NO	NO	NO	NO	NO	0.119	0.146	0.193	0.099	0.062	0.073	0.121	0.177	0.159	0.253	0.224	0.032	0.11	0.151	0.141	0.074	0.016	0.028	0.067	0.004	0.022	0	0.055	0.06	0.05	0.304	0.017	0.082	0.181
	ENSMUSP00000096243|ENSMUSP00000143360	ENSMUST00000098646|ENSMUST00000196899	ENSMUSG00000074248	chr3:121671317-121682835	+	5	6	174	0.5094	0.3506	YES	NA	NO	NO	NO	NO	NO	NO	NO	NO	0	0	0	0	0	0	0	0	0	0	0	0	0	0	0	0	0.004	0	0	0	0	0	0.004	0.011	0	0	0	0	0.005
	ENSMUSP00000096536	ENSMUST00000098935	ENSMUSG00000074473	chr8:12279547-12280065	+	1	1	172	0.4457	0.407	YES	cerebral cortex	NO	NO	NO	NO	NO	NO	NO	NO	0.04	0.064	0.055	0.086	0	0	0	0.002	0.158	0.03	0.145	0	0	0.035	0.003	0	0	0	0	0	0	0	0	0	0	0	0	0	0
	ENSMUSP00000096872	ENSMUST00000099266	ENSMUSG00000074739	chr2:149015928-149016329	-	1	1	133	0.0284	0.7068	YES	NA	NO	NO	NO	NO	NO	NO	NO	NO	0	0	0	0	0	0	0	0	0	0	0	0	0	0	0	0	0	0	0	0	0	0	0	0	0	0	0	0	0
	ENSMUSP00000097022	ENSMUST00000099425	ENSMUSG00000074847	chr13:65259887-65260270	+	1	2	127	0.5965	0.3465	YES	NA	NO	NO	NO	NO	NO	NO	NO	NO	0.031	0.124	0.168	0.086	0.01	0	0.003	0.033	0.018	0.037	0.011	0	0.33	0.322	0.187	0.035	0.016	0.008	0	0	0	0.061	0	0.044	0	0	0	0.006	0.044
	ENSMUSP00000097053	ENSMUST00000099454|MSTRG.146428.1|MSTRG.146428.11|MSTRG.146428.12|MSTRG.146428.14|MSTRG.146428.2|MSTRG.146428.29|MSTRG.146428.32|MSTRG.146428.6|MSTRG.146428.8|MSTRG.146428.9	ENSMUSG00000074873	chr19:41593393-41593782	+	1	8	129	0.1334	0.6202	YES	NA	NO	NO	NO	NO	NO	NO	NO	NO	0.403	1.492	1.329	0.574	0.437	0.836	0.478	0.756	2.213	0.762	2.291	0.873	1.287	0.894	0.909	1.905	2.951	1.849	0.999	0.52	0.816	0.748	1.692	0.981	0.659	0.851	0.668	1.076	1.324
	ENSMUSP00000097134	ENSMUST00000099536	ENSMUSG00000074913	chr19:26885979-26888431	+	4	4	115	0.1651	0.5913	YES	NA	NO	NO	NO	NO	NO	NO	NO	NO	0	0	0	0	0	0	0	0	0	0	0	0	0	0	0	0	0	0	0	0	0	0	0	0	0	0	0	0	0
	ENSMUSP00000097149	ENSMUST00000099552	ENSMUSG00000074919	chr10:77021763-77022131	+	1	3	122	0.3879	0.459	NO	NA	NO	NO	NO	NO	NO	NO	NO	NO	0	0	0	0	0	0	0	0	0	0.062	0	0	0.018	0.006	0.003	0	0	0	0	0	0	0	0	0	0	0.047	0	0.777	0.003
	ENSMUSP00000097253	ENSMUST00000099661	ENSMUSG00000074999	chr10:67572555-67572941	+	1	1	128	0.1385	0.6562	YES	cerebral cortex	NO	NO	NO	NO	NO	NO	NO	NO	0.021	0.004	0.017	0.005	0.009	0.006	0.002	0.013	0.022	0.017	0.008	0	0.016	0.018	0.031	0.012	0.019	0.016	0.006	0	0	0	0	0	0	0.002	0.015	0.005	0.011
	ENSMUSP00000097283	ENSMUST00000099692	ENSMUSG00000075024	chr2:93563885-93564292	+	1	2	135	0.0721	0.6667	YES	cerebral cortex	NO	NO	NO	NO	NO	NO	NO	NO	0	0	0	0	0	0	0	0.005	0.015	0	0	0	0	0	0	0	0	0	0	0	0	0	0	0	0	0	0	0	0
	ENSMUSP00000097473	ENSMUST00000099888|MSTRG.27331.4|MSTRG.27331.5|MSTRG.27331.7|MSTRG.27331.8|MSTRG.27331.9	ENSMUSG00000075184	chr10:43593428-43604420	+	2	3	69	0.2747	0.6087	YES	cerebral cortex	NO	NO	NO	NO	NO	NO	NO	NO	0	0.015	0	0	2.479	2.354	3.142	0	0	0	0	0	0	0	0	0	0	0.697	0.068	0	0	0	0	0	0	0	0	0	0
	ENSMUSP00000097765	ENSMUST00000100190|MSTRG.153275.7	ENSMUSG00000075405	chr2:32574198-32574785	-	1	2	195	0.2472	0.5949	YES	NA	NO	NO	NO	NO	NO	NO	NO	NO	0.06	0.066	0.028	0.068	0	0	0.004	0.026	0.157	0.12	0.179	0	0.298	0.076	0.115	0.007	0	0	0	0	0	0	0.022	0	0	0	0.006	0.002	0.016
	ENSMUSP00000097867	ENSMUST00000100294|MSTRG.96337.1	ENSMUSG00000075465	chr14:122490714-122491151	+	1	2	145	0.6144	0.3103	YES	cerebral cortex	NO	NO	NO	NO	NO	NO	NO	NO	0.057	0.062	0.091	0.111	0	0	0	0.005	0.157	0.105	0.94	0	0.02	0.026	1.731	0	0	0	0	0	0	0	0	0	0	0	0	0	0
	ENSMUSP00000097941	ENSMUST00000100372	ENSMUSG00000075512	chr14:77794823-77798864	-	3	3	123	0.2527	0.5447	YES	cell culture; cerebral cortex	NO	NO	NO	NO	NO	NO	NO	NO	0	0	0	0	0	0	0	0	0	0	0	0	0	0	0.008	0	0	0	0	0	0	0	0	0	0	0	0	0	0
	ENSMUSP00000098020	ENSMUST00000100453	ENSMUSG00000075553	chr14:66868916-66869443	+	1	1	175	0.39	0.36	YES	cerebral cortex	NO	NO	NO	NO	NO	NO	NO	NO	0.219	0.214	0.107	0.254	0.058	0.07	0.031	0.158	0.596	0.139	0.492	0.219	0.12	0.046	0.037	0.077	0.107	0.08	0.028	0.029	0.031	0.059	0.019	0.093	0.01	0.098	0.046	0.02	0.053
	ENSMUSP00000098279	ENSMUST00000100713	ENSMUSG00000072618	chr15:36871574-36871852	-	1	2	92	0.3599	0.5	YES	cerebral cortex	NO	NO	NO	NO	NO	NO	NO	NO	0.065	0.033	0.026	0.021	0.413	0.375	0.482	0.124	0	0	0	0.003	0.134	0.167	0.035	0.113	0.181	0.078	0.019	0.021	0.065	0.047	0.749	0.494	0.005	0.041	0.002	0.022	0.103
	ENSMUSP00000098839	ENSMUST00000101281|MSTRG.63403.1|MSTRG.63403.2	ENSMUSG00000073000	chr12:76451001-76451306	+	1	2	101	0.0408	0.6832	YES	cerebral cortex	NO	NO	NO	NO	NO	NO	NO	NO	0.201	0.101	0.054	0.073	0.381	0.369	0.372	0.154	0.066	0.059	0.051	0.381	0.237	0.168	0.059	0.113	0.478	0.251	0.126	0.189	0.212	0.298	0.543	0.197	0.091	0.213	0.06	2.044	1.15
	ENSMUSP00000098968	ENSMUST00000101425	ENSMUSG00000073090	chr6:48860356-48864297	+	3	3	126	0.292	0.4603	YES	NA	NO	YES	NO	NO	NO	NO	NO	NO	0.028	0.053	0.1	0.03	0.039	0.008	0.051	0.069	0	0.017	0	0	0.086	0.077	0.117	0.308	0.089	0.141	0.015	0	0.417	0.284	0.288	0.314	0	0.001	0.249	2.456	0.026
	ENSMUSP00000099917	ENSMUST00000102853	ENSMUSG00000047363	chr2:30595070-30608469	+	2	2	104	0.137	0.75	YES	cerebral cortex	NO	YES	NO	NO	NO	NO	NO	NO	0.164	0.151	0.107	0.13	0.051	0.017	0.043	0.207	0	0.044	0.022	0	1.07	0.803	0.885	0.254	0.1	0.051	0.177	0	0.008	0.01	0.063	0	0	0.006	0.011	0.19	2.207
	ENSMUSP00000100515	ENSMUST00000104915	ENSMUSG00000078117	chr9:8972135-8972482	+	1	1	115	0.1189	0.6696	YES	NA	NO	NO	NO	NO	NO	NO	NO	NO	0.036	0.051	0.369	0.219	0.003	0	0.005	0.12	0.144	0.302	0.342	0.023	3.225	2.028	1.288	0.078	0.035	0	0.004	0	0	0	0.01	0	0	0	0.004	0.06	0.063
	ENSMUSP00000100571	ENSMUST00000104964|MSTRG.207440.49	ENSMUSG00000078160	chr4:147541051-147541362	+	1	3	103	0.2448	0.4466	YES	cerebral cortex	NO	NO	NO	NO	NO	NO	NO	NO	0.566	0.471	0.629	0.427	0.244	0.204	0.072	0.631	0.686	0.98	0.68	0.147	0.179	0.392	0.278	0.026	0.014	0.014	0.053	0.003	0.004	0.001	0.01	0.008	0.002	0.018	0.021	0.011	0.179
	ENSMUSP00000101048	ENSMUST00000105408|MSTRG.30999.1|MSTRG.30999.3|MSTRG.30999.5	ENSMUSG00000078444	chr10:77258779-77258925	-	1	3	48	0.1581	0.6667	YES	cerebral cortex	NO	YES	NO	NO	NO	NO	NO	NO	0.382	0.398	0.54	0.333	0.205	0.295	0.16	0.455	0.161	0.379	0.243	0.052	0.253	0.113	0.257	0.449	0.1	0.195	0.139	0.453	0.237	0.197	0.228	0.357	0.065	0.083	1.591	1.252	1.443
Gm13030	ENSMUSP00000101431	ENSMUST00000105805	ENSMUSG00000078518	chr4:138871179-138873928	-	3	3	143	0.3324	0.5035	YES	erythroid lineage cell	NO	NO	NO	NO	NO	NO	NO	NO	0	0	0	0	0	0	0	0	0	0	0	0	0	0.005	0	0	0	0	0	0	0	0	0	0	0	0	0	0	0
	ENSMUSP00000102321	ENSMUST00000106710	ENSMUSG00000078605	chr11:109139502-109144060	-	3	3	185	0.6046	0.3405	YES	NA	NO	NO	NO	NO	NO	NO	NO	NO	0	0.006	0	0.005	0	0	0.003	0	0.004	0	0	0	0.013	0	0	0.109	0.005	0	0	0	0.009	0	0.001	0	0	0	0	0	0.075
	ENSMUSP00000102695|ENSMUSP00000102696	ENSMUST00000107080|ENSMUST00000107081|MSTRG.51932.1|MSTRG.51932.4|MSTRG.51932.5	ENSMUSG00000078640	chr11:102576683-102578802	-	2	3	55	0.2146	0.5818	YES	cerebral cortex	NO	NO	YES	NO	NO	NO	NO	NO	1.46	1.355	0.894	0.78	0.041	0.099	0.108	1.747	1.051	0.576	0.35	1.013	1.229	0.986	0.29	1.016	0.085	0.019	0.955	1.017	0	0.095	1.097	0.695	0	0	0	0.115	15.885
	ENSMUSP00000104751	ENSMUST00000109123	ENSMUSG00000072983	chr11:50942372-50943622	-	2	2	133	0.4198	0.4511	YES	cerebral cortex; erythroid lineage cell	NO	NO	NO	NO	NO	NO	NO	YES	0	0	0	0	0	0	0	0	0	0	0	0	0	0	0	0	0	0	0.003	0	0	0	0	0	0	0	0	0	0
	ENSMUSP00000107457	ENSMUST00000111826|MSTRG.88042.2	ENSMUSG00000079261	chr14:46379467-46383343	+	4	4	155	0.2997	0.4129	YES	cerebral cortex	NO	NO	NO	NO	NO	NO	NO	NO	0.05	0.016	0.01	0.011	0	0.008	0.034	0.096	0	0	0	0	0	0.014	0	0.168	0	0.01	0.023	0.005	0	0	0.035	0.166	0	0	0	4.461	0.067
	ENSMUSP00000110767	ENSMUST00000115114	ENSMUSG00000079619	chrX:39346287-39346728	+	2	2	87	0.1483	0.6897	YES	NA	NO	NO	NO	NO	NO	NO	NO	NO	0	0	0	0	0	0	0	0	0	0	0	0	0	0	0	0	0	0	0	0	0	0	0	0	0	0	0	0	0
	ENSMUSP00000110908	ENSMUST00000115253	ENSMUSG00000079642	chrX:36403490-36404511	+	3	3	47	0.367	0.5957	YES	NA	NO	NO	NO	NO	NO	NO	NO	NO	0	0	0	0	0	0	0	0	0	0	0	0	0	0	0	0	0	0	0	0	0	0	0	0	0	0	0	0	0
	ENSMUSP00000125837	ENSMUST00000167536	ENSMUSG00000091526	chr10:58703995-58704279	+	1	1	94	0.1721	0.6277	YES	NA	NO	NO	NO	NO	NO	NO	NO	NO	0.005	0.016	0.006	0	0	0	0	0.018	0	0	0	0	0.006	0.008	0	0	0	0	0	0	0	0	0	0	0	0	0	0	0.04
	ENSMUSP00000126046	ENSMUST00000166373	ENSMUSG00000079183	chr10:97725520-97725867	-	1	1	115	0.0493	0.6522	YES	cell culture, myotube; cerebral cortex	NO	NO	NO	NO	NO	NO	NO	NO	0	0.004	0.003	0.002	0	0	0	0	0	0.014	0.004	0	0.014	0.024	0	0	0	0	0	0	0	0	0	0	0	0	0	0	0
	ENSMUSP00000130803	ENSMUST00000170124	ENSMUSG00000090891	chr6:87104826-87112251	+	2	2	464	0.8212	0.0905	YES	cerebral cortex	NO	NO	NO	NO	NO	NO	NO	NO	0	0.034	0	0	0	0	0	0.568	0	0	0	0	0	0	0	0.082	0.016	0	0	0	0.143	0.038	0	0.141	0	0	0.03	0	0
	ENSMUSP00000131994	ENSMUST00000169531	ENSMUSG00000091193	chr16:77846693-77853020	+	2	2	125	0.473	0.448	NO	NA	NO	NO	NO	NO	NO	NO	NO	NO	0	0	0	0.015	0	0	0	0	0	0	0	0	0	0	0	0	0	0	0	0	0	0	0	0	0	0	0	0	0
	ENSMUSP00000132007	ENSMUST00000041758	ENSMUSG00000090132	chrX:105499792-105500505	+	2	2	180	0.4106	0.4278	YES	NA	NO	NO	NO	NO	NO	NO	NO	NO	0	0	0	0	0	0	0	0	0	0	0	0	0	0	0	0	0.009	0	0	0	0	0	0	0	0	0	0	0	0
	ENSMUSP00000135907	ENSMUST00000177934	ENSMUSG00000094186	chr10:82488107-82492565	-	3	4	94	0.0703	0.617	YES	NA	NO	NO	NO	NO	NO	NO	NO	NO	0	0	0	0	0	0	0	0	0	0	0	0	0	0	0	0	0	0	0	0	0	0	0	0	0	0	0	0	0
	ENSMUSP00000136256	ENSMUST00000177892	ENSMUSG00000096611	chr6:50043325-50043630	-	1	1	101	0.0594	0.7426	YES	cerebral cortex	NO	NO	NO	NO	NO	NO	NO	NO	0.014	0.002	0.001	0.001	0	0	0.022	0.002	0	0	0	0	0.011	0.013	0	0	0	0	0	0	0	0	0	0	0.021	0.038	0	0	0
	ENSMUSP00000136609	ENSMUST00000177929|MSTRG.254539.4	ENSMUSG00000094841	chr7:83549143-83549628	-	1	3	161	0.1252	0.646	YES	erythroid lineage cell	NO	NO	NO	NO	NO	NO	NO	NO	0.004	0.064	0.049	0.047	0	0.003	0	0.028	0.41	0.144	0.157	0	0.016	0.008	0	0	0.017	0	0	0	0	0	0.005	0	0	0	0	0	0.004
	ENSMUSP00000136675	ENSMUST00000179120|MSTRG.100445.1	ENSMUSG00000094112	chr15:40142188-40148689	+	3	4	140	0.0562	0.7286	NO	NA	NO	NO	NO	NO	NO	NO	NO	NO	0.001	0	0	0	0	0	0	0	0.062	0	0	0	0.009	0	0	0	0	0	0	0	0	0	0	0	0	0	0.025	0	0
	ENSMUSP00000136788	ENSMUST00000178179	ENSMUSG00000094690	chr17:45733025-45733793	-	2	2	101	0.5832	0.4356	YES	cerebral cortex	NO	NO	NO	NO	NO	NO	NO	NO	0.021	0.034	0.107	0.03	0.015	0	0.053	0.027	0.118	0.031	0	0	0.06	0.077	0.095	0	0.031	0	0.099	0	0	0	0	0.013	0	0	0	0.023	0
	ENSMUSP00000137210	ENSMUST00000170837|MSTRG.247166.1	ENSMUSG00000091955	chr7:24862501-24862650	+	1	1	49	0.4047	0.3878	NO	NA	NO	NO	NO	NO	NO	NO	NO	NO	4.725	3.375	5.619	6.74	1.567	1.542	1.204	2.504	10.025	3.314	0.705	0.186	1.637	1.68	0.647	2.337	6.897	4.791	0.775	0.626	0.745	0.5	4.546	1.862	0	0.164	0.037	0.575	4.046
	ENSMUSP00000137274	ENSMUST00000179096	ENSMUSG00000095240	chrX:39863142-39863583	-	2	2	87	0.199	0.6552	YES	NA	NO	NO	NO	NO	NO	NO	NO	NO	0	0	0	0	0	0	0	0	0	0	0	0	0	0	0	0	0	0	0	0	0	0	0	0	0	0	0	0	0
	ENSMUSP00000137308	ENSMUST00000179013|MSTRG.282692.1	ENSMUSG00000095385	chr9:43259916-43280003	+	3	3	154	0.317	0.3961	YES	acute leukemia, B cell	NO	NO	NO	NO	NO	NO	NO	NO	0.137	0.029	0.01	0.018	0.012	0.014	0.016	0.15	0	0	0	0	0.039	0.031	0.006	0.005	0.032	0.126	0.041	0.01	0.013	0.01	0.012	0.163	0.274	0.086	0.001	0.086	0.04
	ENSMUSP00000137513	ENSMUST00000177649	ENSMUSG00000095213	chr4:144453009-144453317	-	1	1	102	0.0641	0.7157	YES	cerebral cortex	NO	NO	NO	NO	NO	NO	NO	NO	0	0	0	0	0	0	0	0	0	0	0	0	0	0	0	0	0	0	0	0.005	0	0	0	0	0	0	0	0	0
	ENSMUSP00000137551	ENSMUST00000179160	ENSMUSG00000095953	chr12:31184623-31185177	+	1	1	184	0.1517	0.6413	YES	cerebral cortex	NO	NO	NO	NO	NO	NO	NO	NO	0.013	0.011	0.015	0	0	0	0.012	0.012	0	0	0	0	0	0	0	0	0	0	0.063	0	0	0	0	0	0	0	0.062	0.027	0
	ENSMUSP00000137761	ENSMUST00000181711	ENSMUSG00000097187	chr2:84742471-84743465	-	2	2	77	0.2693	0.4675	NO	NA	NO	YES	NO	NO	NO	NO	NO	NO	14.185	3.343	1.779	1.647	1.627	1.012	1.186	4.138	0.153	0.137	0	0	0.45	0.954	0.887	0.952	0	0.063	0.114	0	0	0	0.065	0.026	0.977	0.438	0.298	0.746	1.272
	ENSMUSP00000140100	ENSMUST00000189185|MSTRG.105698.2|MSTRG.105698.4|MSTRG.105698.5	ENSMUSG00000100967	chr15:84913978-84915921	-	2	2	126	0.3738	0.5476	NO	NA	NO	NO	NO	NO	NO	NO	NO	NO	0.185	0.288	0.359	0.241	0.238	0.012	0.011	0.238	0.119	0.133	0.068	0	0.386	0.446	0.391	0.016	0.006	0.002	0.059	0	0	0	0.009	0	0.001	0.003	0	0.002	0.161
	ENSMUSP00000140288	ENSMUST00000188005	ENSMUSG00000101315	chr1:83060996-83061412	+	1	1	138	0	0.9783	YES	NA	NO	NO	NO	NO	NO	NO	NO	NO	0.01	0.013	0.021	0.009	0.009	0.012	0.024	0.041	0	0.004	0	0	0.049	0.045	0.006	0.097	0.003	0.016	0.008	0.002	0.566	0.034	0.004	0.015	0	0	0.005	0.01	0.001
	ENSMUSP00000141296	ENSMUST00000193521	ENSMUSG00000102308	chr3:92532867-92533130	-	1	2	87	0.0336	0.069	NO	NA	NO	NO	NO	NO	NO	NO	NO	NO	0	0	0	0	0	0	0	0	0	0	0	0	0	0.007	0	0.462	0.434	0	0	0.104	0	0	0	0	0	0	0	0	0
[truncated: 7 more columns]

## Sheet: reassembled transcripts
1	StringTie	transcript	171895664	171909732	1000	+	.	gene_id "MSTRG.19208"; transcript_id "MSTRG.19208.1";
1	StringTie	exon	171895664	171900227	1000	+	.	gene_id "MSTRG.19208"; transcript_id "MSTRG.19208.1"; exon_number "1";
1	StringTie	exon	171906491	171909732	1000	+	.	gene_id "MSTRG.19208"; transcript_id "MSTRG.19208.1"; exon_number "2";
1	StringTie	transcript	171895771	171909836	1000	+	.	gene_id "MSTRG.19208"; transcript_id "MSTRG.19208.3";
1	StringTie	exon	171895771	171900227	1000	+	.	gene_id "MSTRG.19208"; transcript_id "MSTRG.19208.3"; exon_number "1";
1	StringTie	exon	171903727	171903827	1000	+	.	gene_id "MSTRG.19208"; transcript_id "MSTRG.19208.3"; exon_number "2";
1	StringTie	exon	171906491	171909836	1000	+	.	gene_id "MSTRG.19208"; transcript_id "MSTRG.19208.3"; exon_number "3";
10	StringTie	transcript	20310506	20341197	1000	-	.	gene_id "MSTRG.24685"; transcript_id "MSTRG.24685.2";
10	StringTie	exon	20310506	20312604	1000	-	.	gene_id "MSTRG.24685"; transcript_id "MSTRG.24685.2"; exon_number "1";
10	StringTie	exon	20318008	20318111	1000	-	.	gene_id "MSTRG.24685"; transcript_id "MSTRG.24685.2"; exon_number "2";
10	StringTie	exon	20322003	20322116	1000	-	.	gene_id "MSTRG.24685"; transcript_id "MSTRG.24685.2"; exon_number "3";
10	StringTie	exon	20322963	20323868	1000	-	.	gene_id "MSTRG.24685"; transcript_id "MSTRG.24685.2"; exon_number "4";
10	StringTie	exon	20325140	20325805	1000	-	.	gene_id "MSTRG.24685"; transcript_id "MSTRG.24685.2"; exon_number "5";
10	StringTie	exon	20325930	20326099	1000	-	.	gene_id "MSTRG.24685"; transcript_id "MSTRG.24685.2"; exon_number "6";
10	StringTie	exon	20328102	20328207	1000	-	.	gene_id "MSTRG.24685"; transcript_id "MSTRG.24685.2"; exon_number "7";
10	StringTie	exon	20329310	20329394	1000	-	.	gene_id "MSTRG.24685"; transcript_id "MSTRG.24685.2"; exon_number "8";
10	StringTie	exon	20332086	20332261	1000	-	.	gene_id "MSTRG.24685"; transcript_id "MSTRG.24685.2"; exon_number "9";
10	StringTie	exon	20333392	20333572	1000	-	.	gene_id "MSTRG.24685"; transcript_id "MSTRG.24685.2"; exon_number "10";
10	StringTie	exon	20334499	20334645	1000	-	.	gene_id "MSTRG.24685"; transcript_id "MSTRG.24685.2"; exon_number "11";
10	StringTie	exon	20339709	20339921	1000	-	.	gene_id "MSTRG.24685"; transcript_id "MSTRG.24685.2"; exon_number "12";
10	StringTie	exon	20340052	20341197	1000	-	.	gene_id "MSTRG.24685"; transcript_id "MSTRG.24685.2"; exon_number "13";
10	StringTie	transcript	43593427	43607070	1000	+	.	gene_id "MSTRG.27331"; transcript_id "MSTRG.27331.4";
10	StringTie	exon	43593427	43593563	1000	+	.	gene_id "MSTRG.27331"; transcript_id "MSTRG.27331.4"; exon_number "1";
10	StringTie	exon	43604347	43604518	1000	+	.	gene_id "MSTRG.27331"; transcript_id "MSTRG.27331.4"; exon_number "2";
10	StringTie	exon	43606161	43607070	1000	+	.	gene_id "MSTRG.27331"; transcript_id "MSTRG.27331.4"; exon_number "3";
10	StringTie	transcript	43593427	43631677	1000	+	.	gene_id "MSTRG.27331"; transcript_id "MSTRG.27331.5";
10	StringTie	exon	43593427	43593563	1000	+	.	gene_id "MSTRG.27331"; transcript_id "MSTRG.27331.5"; exon_number "1";
10	StringTie	exon	43604347	43604518	1000	+	.	gene_id "MSTRG.27331"; transcript_id "MSTRG.27331.5"; exon_number "2";
10	StringTie	exon	43604633	43604801	1000	+	.	gene_id "MSTRG.27331"; transcript_id "MSTRG.27331.5"; exon_number "3";
10	StringTie	exon	43605162	43606322	1000	+	.	gene_id "MSTRG.27331"; transcript_id "MSTRG.27331.5"; exon_number "4";
10	StringTie	exon	43629391	43631677	1000	+	.	gene_id "MSTRG.27331"; transcript_id "MSTRG.27331.5"; exon_number "5";
10	StringTie	transcript	43593427	43630916	1000	+	.	gene_id "MSTRG.27331"; transcript_id "MSTRG.27331.7";
10	StringTie	exon	43593427	43593563	1000	+	.	gene_id "MSTRG.27331"; transcript_id "MSTRG.27331.7"; exon_number "1";
10	StringTie	exon	43604347	43604518	1000	+	.	gene_id "MSTRG.27331"; transcript_id "MSTRG.27331.7"; exon_number "2";
10	StringTie	exon	43604633	43604801	1000	+	.	gene_id "MSTRG.27331"; transcript_id "MSTRG.27331.7"; exon_number "3";
10	StringTie	exon	43605162	43606381	1000	+	.	gene_id "MSTRG.27331"; transcript_id "MSTRG.27331.7"; exon_number "4";
10	StringTie	exon	43629391	43630916	1000	+	.	gene_id "MSTRG.27331"; transcript_id "MSTRG.27331.7"; exon_number "5";
10	StringTie	transcript	43593427	43630916	1000	+	.	gene_id "MSTRG.27331"; transcript_id "MSTRG.27331.8";
10	StringTie	exon	43593427	43593563	1000	+	.	gene_id "MSTRG.27331"; transcript_id "MSTRG.27331.8"; exon_number "1";
10	StringTie	exon	43604347	43604518	1000	+	.	gene_id "MSTRG.27331"; transcript_id "MSTRG.27331.8"; exon_number "2";
10	StringTie	exon	43605162	43606381	1000	+	.	gene_id "MSTRG.27331"; transcript_id "MSTRG.27331.8"; exon_number "3";
10	StringTie	exon	43629391	43630916	1000	+	.	gene_id "MSTRG.27331"; transcript_id "MSTRG.27331.8"; exon_number "4";
10	StringTie	transcript	43593427	43632372	1000	+	.	gene_id "MSTRG.27331"; transcript_id "MSTRG.27331.9";
10	StringTie	exon	43593427	43593563	1000	+	.	gene_id "MSTRG.27331"; transcript_id "MSTRG.27331.9"; exon_number "1";
10	StringTie	exon	43604347	43604801	1000	+	.	gene_id "MSTRG.27331"; transcript_id "MSTRG.27331.9"; exon_number "2";
10	StringTie	exon	43606161	43606322	1000	+	.	gene_id "MSTRG.27331"; transcript_id "MSTRG.27331.9"; exon_number "3";
10	StringTie	exon	43629391	43631021	1000	+	.	gene_id "MSTRG.27331"; transcript_id "MSTRG.27331.9"; exon_number "4";
10	StringTie	exon	43631155	43632372	1000	+	.	gene_id "MSTRG.27331"; transcript_id "MSTRG.27331.9"; exon_number "5";
10	StringTie	transcript	77248440	77259215	1000	-	.	gene_id "MSTRG.30999"; transcript_id "MSTRG.30999.1";
10	StringTie	exon	77248440	77249831	1000	-	.	gene_id "MSTRG.30999"; transcript_id "MSTRG.30999.1"; exon_number "1";
10	StringTie	exon	77258727	77259215	1000	-	.	gene_id "MSTRG.30999"; transcript_id "MSTRG.30999.1"; exon_number "2";
10	StringTie	transcript	77257511	77259555	1000	-	.	gene_id "MSTRG.30999"; transcript_id "MSTRG.30999.3";
10	StringTie	exon	77257511	77257564	1000	-	.	gene_id "MSTRG.30999"; transcript_id "MSTRG.30999.3"; exon_number "1";
10	StringTie	exon	77258727	77259555	1000	-	.	gene_id "MSTRG.30999"; transcript_id "MSTRG.30999.3"; exon_number "2";
10	StringTie	transcript	77257779	77259223	1000	-	.	gene_id "MSTRG.30999"; transcript_id "MSTRG.30999.5";
10	StringTie	exon	77257779	77257986	1000	-	.	gene_id "MSTRG.30999"; transcript_id "MSTRG.30999.5"; exon_number "1";
10	StringTie	exon	77258727	77259090	1000	-	.	gene_id "MSTRG.30999"; transcript_id "MSTRG.30999.5"; exon_number "2";
10	StringTie	exon	77259183	77259223	1000	-	.	gene_id "MSTRG.30999"; transcript_id "MSTRG.30999.5"; exon_number "3";
10	StringTie	transcript	120765774	120778886	1000	+	.	gene_id "MSTRG.36806"; transcript_id "MSTRG.36806.1";
10	StringTie	exon	120765774	120765838	1000	+	.	gene_id "MSTRG.36806"; transcript_id "MSTRG.36806.1"; exon_number "1";
10	StringTie	exon	120770915	120771131	1000	+	.	gene_id "MSTRG.36806"; transcript_id "MSTRG.36806.1"; exon_number "2";
10	StringTie	exon	120774315	120774401	1000	+	.	gene_id "MSTRG.36806"; transcript_id "MSTRG.36806.1"; exon_number "3";
10	StringTie	exon	120775551	120775629	1000	+	.	gene_id "MSTRG.36806"; transcript_id "MSTRG.36806.1"; exon_number "4";
10	StringTie	exon	120777635	120778886	1000	+	.	gene_id "MSTRG.36806"; transcript_id "MSTRG.36806.1"; exon_number "5";
11	StringTie	transcript	53452172	53457110	1000	-	.	gene_id "MSTRG.44353"; transcript_id "MSTRG.44353.3";
11	StringTie	exon	53452172	53452707	1000	-	.	gene_id "MSTRG.44353"; transcript_id "MSTRG.44353.3"; exon_number "1";
11	StringTie	exon	53454087	53454232	1000	-	.	gene_id "MSTRG.44353"; transcript_id "MSTRG.44353.3"; exon_number "2";
11	StringTie	exon	53454868	53457110	1000	-	.	gene_id "MSTRG.44353"; transcript_id "MSTRG.44353.3"; exon_number "3";
11	StringTie	transcript	53452225	53457110	1000	-	.	gene_id "MSTRG.44353"; transcript_id "MSTRG.44353.4";
11	StringTie	exon	53452225	53452707	1000	-	.	gene_id "MSTRG.44353"; transcript_id "MSTRG.44353.4"; exon_number "1";
11	StringTie	exon	53454097	53457110	1000	-	.	gene_id "MSTRG.44353"; transcript_id "MSTRG.44353.4"; exon_number "2";
11	StringTie	transcript	53478219	53483462	1000	+	.	gene_id "MSTRG.44361"; transcript_id "MSTRG.44361.5";
11	StringTie	exon	53478219	53480935	1000	+	.	gene_id "MSTRG.44361"; transcript_id "MSTRG.44361.5"; exon_number "1";
11	StringTie	exon	53482261	53482366	1000	+	.	gene_id "MSTRG.44361"; transcript_id "MSTRG.44361.5"; exon_number "2";
11	StringTie	exon	53483131	53483462	1000	+	.	gene_id "MSTRG.44361"; transcript_id "MSTRG.44361.5"; exon_number "3";
11	StringTie	transcript	53478488	53484266	1000	+	.	gene_id "MSTRG.44361"; transcript_id "MSTRG.44361.6";
11	StringTie	exon	53478488	53482365	1000	+	.	gene_id "MSTRG.44361"; transcript_id "MSTRG.44361.6"; exon_number "1";
11	StringTie	exon	53483125	53484266	1000	+	.	gene_id "MSTRG.44361"; transcript_id "MSTRG.44361.6"; exon_number "2";
11	StringTie	transcript	102576395	102579504	1000	-	.	gene_id "MSTRG.51932"; transcript_id "MSTRG.51932.1";
11	StringTie	exon	102576395	102576797	1000	-	.	gene_id "MSTRG.51932"; transcript_id "MSTRG.51932.1"; exon_number "1";
11	StringTie	exon	102578750	102578895	1000	-	.	gene_id "MSTRG.51932"; transcript_id "MSTRG.51932.1"; exon_number "2";
11	StringTie	exon	102579161	102579504	1000	-	.	gene_id "MSTRG.51932"; transcript_id "MSTRG.51932.1"; exon_number "3";
11	StringTie	transcript	102576465	102579605	1000	-	.	gene_id "MSTRG.51932"; transcript_id "MSTRG.51932.4";
11	StringTie	exon	102576465	102576797	1000	-	.	gene_id "MSTRG.51932"; transcript_id "MSTRG.51932.4"; exon_number "1";
11	StringTie	exon	102578750	102578895	1000	-	.	gene_id "MSTRG.51932"; transcript_id "MSTRG.51932.4"; exon_number "2";
11	StringTie	exon	102578988	102579090	1000	-	.	gene_id "MSTRG.51932"; transcript_id "MSTRG.51932.4"; exon_number "3";
11	StringTie	exon	102579190	102579605	1000	-	.	gene_id "MSTRG.51932"; transcript_id "MSTRG.51932.4"; exon_number "4";
11	StringTie	transcript	102576491	102579275	1000	-	.	gene_id "MSTRG.51932"; transcript_id "MSTRG.51932.5";
11	StringTie	exon	102576491	102576797	1000	-	.	gene_id "MSTRG.51932"; transcript_id "MSTRG.51932.5"; exon_number "1";
11	StringTie	exon	102578750	102578895	1000	-	.	gene_id "MSTRG.51932"; transcript_id "MSTRG.51932.5"; exon_number "2";
11	StringTie	exon	102578988	102579090	1000	-	.	gene_id "MSTRG.51932"; transcript_id "MSTRG.51932.5"; exon_number "3";
11	StringTie	exon	102579161	102579275	1000	-	.	gene_id "MSTRG.51932"; transcript_id "MSTRG.51932.5"; exon_number "4";
11	StringTie	transcript	117480669	117489014	1000	+	.	gene_id "MSTRG.54322"; transcript_id "MSTRG.54322.1";
11	StringTie	exon	117480669	117480936	1000	+	.	gene_id "MSTRG.54322"; transcript_id "MSTRG.54322.1"; exon_number "1";
11	StringTie	exon	117484151	117484516	1000	+	.	gene_id "MSTRG.54322"; transcript_id "MSTRG.54322.1"; exon_number "2";
11	StringTie	exon	117486763	117486894	1000	+	.	gene_id "MSTRG.54322"; transcript_id "MSTRG.54322.1"; exon_number "3";
11	StringTie	exon	117486985	117489014	1000	+	.	gene_id "MSTRG.54322"; transcript_id "MSTRG.54322.1"; exon_number "4";
12	StringTie	transcript	34371503	34874826	1000	-	.	gene_id "MSTRG.59171"; transcript_id "MSTRG.59171.30";
12	StringTie	exon	34371503	34374138	1000	-	.	gene_id "MSTRG.59171"; transcript_id "MSTRG.59171.30"; exon_number "1";
12	StringTie	exon	34389245	34389462	1000	-	.	gene_id "MSTRG.59171"; transcript_id "MSTRG.59171.30"; exon_number "2";
12	StringTie	exon	34390142	34390352	1000	-	.	gene_id "MSTRG.59171"; transcript_id "MSTRG.59171.30"; exon_number "3";
12	StringTie	exon	34393283	34393405	1000	-	.	gene_id "MSTRG.59171"; transcript_id "MSTRG.59171.30"; exon_number "4";
12	StringTie	exon	34402752	34402867	1000	-	.	gene_id "MSTRG.59171"; transcript_id "MSTRG.59171.30"; exon_number "5";
12	StringTie	exon	34429498	34429619	1000	-	.	gene_id "MSTRG.59171"; transcript_id "MSTRG.59171.30"; exon_number "6";
12	StringTie	exon	34431869	34431989	1000	-	.	gene_id "MSTRG.59171"; transcript_id "MSTRG.59171.30"; exon_number "7";
12	StringTie	exon	34433081	34433231	1000	-	.	gene_id "MSTRG.59171"; transcript_id "MSTRG.59171.30"; exon_number "8";
12	StringTie	exon	34437137	34437378	1000	-	.	gene_id "MSTRG.59171"; transcript_id "MSTRG.59171.30"; exon_number "9";
12	StringTie	exon	34528283	34528345	1000	-	.	gene_id "MSTRG.59171"; transcript_id "MSTRG.59171.30"; exon_number "10";
12	StringTie	exon	34817866	34817921	1000	-	.	gene_id "MSTRG.59171"; transcript_id "MSTRG.59171.30"; exon_number "11";
12	StringTie	exon	34827637	34827753	1000	-	.	gene_id "MSTRG.59171"; transcript_id "MSTRG.59171.30"; exon_number "12";
12	StringTie	exon	34861345	34861441	1000	-	.	gene_id "MSTRG.59171"; transcript_id "MSTRG.59171.30"; exon_number "13";
12	StringTie	exon	34874076	34874826	1000	-	.	gene_id "MSTRG.59171"; transcript_id "MSTRG.59171.30"; exon_number "14";
12	StringTie	transcript	34824146	34874815	1000	-	.	gene_id "MSTRG.59171"; transcript_id "MSTRG.59171.68";
12	StringTie	exon	34824146	34824256	1000	-	.	gene_id "MSTRG.59171"; transcript_id "MSTRG.59171.68"; exon_number "1";
12	StringTie	exon	34827637	34827753	1000	-	.	gene_id "MSTRG.59171"; transcript_id "MSTRG.59171.68"; exon_number "2";
12	StringTie	exon	34861345	34861441	1000	-	.	gene_id "MSTRG.59171"; transcript_id "MSTRG.59171.68"; exon_number "3";
12	StringTie	exon	34872674	34872795	1000	-	.	gene_id "MSTRG.59171"; transcript_id "MSTRG.59171.68"; exon_number "4";
12	StringTie	exon	34874076	34874815	1000	-	.	gene_id "MSTRG.59171"; transcript_id "MSTRG.59171.68"; exon_number "5";
12	StringTie	transcript	74281871	74302559	1000	+	.	gene_id "MSTRG.63146"; transcript_id "MSTRG.63146.1";
12	StringTie	exon	74281871	74284456	1000	+	.	gene_id "MSTRG.63146"; transcript_id "MSTRG.63146.1"; exon_number "1";
12	StringTie	exon	74285515	74285638	1000	+	.	gene_id "MSTRG.63146"; transcript_id "MSTRG.63146.1"; exon_number "2";
12	StringTie	exon	74295323	74295438	1000	+	.	gene_id "MSTRG.63146"; transcript_id "MSTRG.63146.1"; exon_number "3";
12	StringTie	exon	74295553	74300171	1000	+	.	gene_id "MSTRG.63146"; transcript_id "MSTRG.63146.1"; exon_number "4";
12	StringTie	exon	74300192	74302559	1000	+	.	gene_id "MSTRG.63146"; transcript_id "MSTRG.63146.1"; exon_number "5";
12	StringTie	transcript	74284289	74300521	1000	+	.	gene_id "MSTRG.63146"; transcript_id "MSTRG.63146.3";
12	StringTie	exon	74284289	74284456	1000	+	.	gene_id "MSTRG.63146"; transcript_id "MSTRG.63146.3"; exon_number "1";
12	StringTie	exon	74285515	74285638	1000	+	.	gene_id "MSTRG.63146"; transcript_id "MSTRG.63146.3"; exon_number "2";
12	StringTie	exon	74295323	74295438	1000	+	.	gene_id "MSTRG.63146"; transcript_id "MSTRG.63146.3"; exon_number "3";
12	StringTie	exon	74295553	74300071	1000	+	.	gene_id "MSTRG.63146"; transcript_id "MSTRG.63146.3"; exon_number "4";
12	StringTie	exon	74300201	74300521	1000	+	.	gene_id "MSTRG.63146"; transcript_id "MSTRG.63146.3"; exon_number "5";
12	StringTie	transcript	74284289	74302008	1000	+	.	gene_id "MSTRG.63146"; transcript_id "MSTRG.63146.4";
12	StringTie	exon	74284289	74284456	1000	+	.	gene_id "MSTRG.63146"; transcript_id "MSTRG.63146.4"; exon_number "1";
12	StringTie	exon	74285515	74285638	1000	+	.	gene_id "MSTRG.63146"; transcript_id "MSTRG.63146.4"; exon_number "2";
12	StringTie	exon	74295323	74295438	1000	+	.	gene_id "MSTRG.63146"; transcript_id "MSTRG.63146.4"; exon_number "3";
12	StringTie	exon	74295553	74300060	1000	+	.	gene_id "MSTRG.63146"; transcript_id "MSTRG.63146.4"; exon_number "4";
12	StringTie	exon	74300192	74302008	1000	+	.	gene_id "MSTRG.63146"; transcript_id "MSTRG.63146.4"; exon_number "5";
12	StringTie	transcript	76444150	76454589	1000	+	.	gene_id "MSTRG.63403"; transcript_id "MSTRG.63403.1";
12	StringTie	exon	76444150	76444665	1000	+	.	gene_id "MSTRG.63403"; transcript_id "MSTRG.63403.1"; exon_number "1";
12	StringTie	exon	76447975	76454589	1000	+	.	gene_id "MSTRG.63403"; transcript_id "MSTRG.63403.1"; exon_number "2";
12	StringTie	transcript	76444509	76451392	1000	+	.	gene_id "MSTRG.63403"; transcript_id "MSTRG.63403.2";
12	StringTie	exon	76444509	76444665	1000	+	.	gene_id "MSTRG.63403"; transcript_id "MSTRG.63403.2"; exon_number "1";
12	StringTie	exon	76447975	76449832	1000	+	.	gene_id "MSTRG.63403"; transcript_id "MSTRG.63403.2"; exon_number "2";
12	StringTie	exon	76450146	76451392	1000	+	.	gene_id "MSTRG.63403"; transcript_id "MSTRG.63403.2"; exon_number "3";
12	StringTie	transcript	103393940	103407820	1000	-	.	gene_id "MSTRG.66555"; transcript_id "MSTRG.66555.1";
12	StringTie	exon	103393940	103393977	1000	-	.	gene_id "MSTRG.66555"; transcript_id "MSTRG.66555.1"; exon_number "1";
12	StringTie	exon	103400196	103400291	1000	-	.	gene_id "MSTRG.66555"; transcript_id "MSTRG.66555.1"; exon_number "2";
12	StringTie	exon	103400949	103401067	1000	-	.	gene_id "MSTRG.66555"; transcript_id "MSTRG.66555.1"; exon_number "3";
12	StringTie	exon	103402817	103402901	1000	-	.	gene_id "MSTRG.66555"; transcript_id "MSTRG.66555.1"; exon_number "4";
12	StringTie	exon	103403234	103403428	1000	-	.	gene_id "MSTRG.66555"; transcript_id "MSTRG.66555.1"; exon_number "5";
12	StringTie	exon	103404226	103407820	1000	-	.	gene_id "MSTRG.66555"; transcript_id "MSTRG.66555.1"; exon_number "6";
12	StringTie	transcript	103399910	103425867	1000	-	.	gene_id "MSTRG.66555"; transcript_id "MSTRG.66555.2";
12	StringTie	exon	103399910	103400291	1000	-	.	gene_id "MSTRG.66555"; transcript_id "MSTRG.66555.2"; exon_number "1";
12	StringTie	exon	103400949	103408477	1000	-	.	gene_id "MSTRG.66555"; transcript_id "MSTRG.66555.2"; exon_number "2";
12	StringTie	exon	103409928	103410057	1000	-	.	gene_id "MSTRG.66555"; transcript_id "MSTRG.66555.2"; exon_number "3";
12	StringTie	exon	103411129	103411317	1000	-	.	gene_id "MSTRG.66555"; transcript_id "MSTRG.66555.2"; exon_number "4";
12	StringTie	exon	103416196	103416271	1000	-	.	gene_id "MSTRG.66555"; transcript_id "MSTRG.66555.2"; exon_number "5";
12	StringTie	exon	103417278	103417793	1000	-	.	gene_id "MSTRG.66555"; transcript_id "MSTRG.66555.2"; exon_number "6";
12	StringTie	exon	103418064	103418217	1000	-	.	gene_id "MSTRG.66555"; transcript_id "MSTRG.66555.2"; exon_number "7";
12	StringTie	exon	103418962	103419483	1000	-	.	gene_id "MSTRG.66555"; transcript_id "MSTRG.66555.2"; exon_number "8";
12	StringTie	exon	103423872	103424597	1000	-	.	gene_id "MSTRG.66555"; transcript_id "MSTRG.66555.2"; exon_number "9";
12	StringTie	exon	103425779	103425867	1000	-	.	gene_id "MSTRG.66555"; transcript_id "MSTRG.66555.2"; exon_number "10";
13	StringTie	transcript	46176026	46178646	1000	-	.	gene_id "MSTRG.74363"; transcript_id "MSTRG.74363.2";
13	StringTie	exon	46176026	46178269	1000	-	.	gene_id "MSTRG.74363"; transcript_id "MSTRG.74363.2"; exon_number "1";
13	StringTie	exon	46178427	46178646	1000	-	.	gene_id "MSTRG.74363"; transcript_id "MSTRG.74363.2"; exon_number "2";
13	StringTie	transcript	94355839	94566162	1000	-	.	gene_id "MSTRG.80194"; transcript_id "MSTRG.80194.1";
13	StringTie	exon	94355839	94359231	1000	-	.	gene_id "MSTRG.80194"; transcript_id "MSTRG.80194.1"; exon_number "1";
13	StringTie	exon	94390792	94390867	1000	-	.	gene_id "MSTRG.80194"; transcript_id "MSTRG.80194.1"; exon_number "2";
13	StringTie	exon	94394719	94394793	1000	-	.	gene_id "MSTRG.80194"; transcript_id "MSTRG.80194.1"; exon_number "3";
13	StringTie	exon	94403338	94403433	1000	-	.	gene_id "MSTRG.80194"; transcript_id "MSTRG.80194.1"; exon_number "4";
13	StringTie	exon	94403947	94404107	1000	-	.	gene_id "MSTRG.80194"; transcript_id "MSTRG.80194.1"; exon_number "5";
13	StringTie	exon	94408777	94408843	1000	-	.	gene_id "MSTRG.80194"; transcript_id "MSTRG.80194.1"; exon_number "6";
13	StringTie	exon	94417961	94418143	1000	-	.	gene_id "MSTRG.80194"; transcript_id "MSTRG.80194.1"; exon_number "7";
13	StringTie	exon	94440255	94440413	1000	-	.	gene_id "MSTRG.80194"; transcript_id "MSTRG.80194.1"; exon_number "8";
13	StringTie	exon	94443919	94444016	1000	-	.	gene_id "MSTRG.80194"; transcript_id "MSTRG.80194.1"; exon_number "9";
13	StringTie	exon	94445922	94445976	1000	-	.	gene_id "MSTRG.80194"; transcript_id "MSTRG.80194.1"; exon_number "10";
13	StringTie	exon	94446066	94446137	1000	-	.	gene_id "MSTRG.80194"; transcript_id "MSTRG.80194.1"; exon_number "11";
13	StringTie	exon	94448453	94448515	1000	-	.	gene_id "MSTRG.80194"; transcript_id "MSTRG.80194.1"; exon_number "12";
13	StringTie	exon	94450953	94451085	1000	-	.	gene_id "MSTRG.80194"; transcript_id "MSTRG.80194.1"; exon_number "13";
13	StringTie	exon	94455396	94455505	1000	-	.	gene_id "MSTRG.80194"; transcript_id "MSTRG.80194.1"; exon_number "14";
13	StringTie	exon	94462396	94462572	1000	-	.	gene_id "MSTRG.80194"; transcript_id "MSTRG.80194.1"; exon_number "15";
13	StringTie	exon	94471676	94471862	1000	-	.	gene_id "MSTRG.80194"; transcript_id "MSTRG.80194.1"; exon_number "16";
13	StringTie	exon	94472799	94472929	1000	-	.	gene_id "MSTRG.80194"; transcript_id "MSTRG.80194.1"; exon_number "17";
13	StringTie	exon	94476966	94477128	1000	-	.	gene_id "MSTRG.80194"; transcript_id "MSTRG.80194.1"; exon_number "18";
13	StringTie	exon	94479727	94479874	1000	-	.	gene_id "MSTRG.80194"; transcript_id "MSTRG.80194.1"; exon_number "19";
13	StringTie	exon	94483213	94483360	1000	-	.	gene_id "MSTRG.80194"; transcript_id "MSTRG.80194.1"; exon_number "20";
13	StringTie	exon	94493669	94493741	1000	-	.	gene_id "MSTRG.80194"; transcript_id "MSTRG.80194.1"; exon_number "21";
13	StringTie	exon	94501918	94502024	1000	-	.	gene_id "MSTRG.80194"; transcript_id "MSTRG.80194.1"; exon_number "22";
13	StringTie	exon	94528165	94528396	1000	-	.	gene_id "MSTRG.80194"; transcript_id "MSTRG.80194.1"; exon_number "23";
13	StringTie	exon	94531982	94532066	1000	-	.	gene_id "MSTRG.80194"; transcript_id "MSTRG.80194.1"; exon_number "24";
13	StringTie	exon	94542779	94542876	1000	-	.	gene_id "MSTRG.80194"; transcript_id "MSTRG.80194.1"; exon_number "25";
13	StringTie	exon	94547755	94547893	1000	-	.	gene_id "MSTRG.80194"; transcript_id "MSTRG.80194.1"; exon_number "26";
13	StringTie	exon	94565605	94566162	1000	-	.	gene_id "MSTRG.80194"; transcript_id "MSTRG.80194.1"; exon_number "27";
13	StringTie	transcript	107022419	107055497	1000	+	.	gene_id "MSTRG.81756"; transcript_id "MSTRG.81756.2";
13	StringTie	exon	107022419	107023982	1000	+	.	gene_id "MSTRG.81756"; transcript_id "MSTRG.81756.2"; exon_number "1";
13	StringTie	exon	107026399	107026455	1000	+	.	gene_id "MSTRG.81756"; transcript_id "MSTRG.81756.2"; exon_number "2";
13	StringTie	exon	107028720	107032949	1000	+	.	gene_id "MSTRG.81756"; transcript_id "MSTRG.81756.2"; exon_number "3";
13	StringTie	exon	107054854	107054967	1000	+	.	gene_id "MSTRG.81756"; transcript_id "MSTRG.81756.2"; exon_number "4";
13	StringTie	exon	107055285	107055497	1000	+	.	gene_id "MSTRG.81756"; transcript_id "MSTRG.81756.2"; exon_number "5";
13	StringTie	transcript	107022426	107055497	1000	+	.	gene_id "MSTRG.81756"; transcript_id "MSTRG.81756.4";
13	StringTie	exon	107022426	107026455	1000	+	.	gene_id "MSTRG.81756"; transcript_id "MSTRG.81756.4"; exon_number "1";
13	StringTie	exon	107028720	107032949	1000	+	.	gene_id "MSTRG.81756"; transcript_id "MSTRG.81756.4"; exon_number "2";
13	StringTie	exon	107054854	107055497	1000	+	.	gene_id "MSTRG.81756"; transcript_id "MSTRG.81756.4"; exon_number "3";
13	StringTie	transcript	107022426	107033673	1000	+	.	gene_id "MSTRG.81756"; transcript_id "MSTRG.81756.5";
13	StringTie	exon	107022426	107023982	1000	+	.	gene_id "MSTRG.81756"; transcript_id "MSTRG.81756.5"; exon_number "1";
13	StringTie	exon	107026399	107026455	1000	+	.	gene_id "MSTRG.81756"; transcript_id "MSTRG.81756.5"; exon_number "2";
13	StringTie	exon	107028720	107032949	1000	+	.	gene_id "MSTRG.81756"; transcript_id "MSTRG.81756.5"; exon_number "3";
13	StringTie	exon	107033265	107033673	1000	+	.	gene_id "MSTRG.81756"; transcript_id "MSTRG.81756.5"; exon_number "4";
13	StringTie	transcript	107022426	107033673	1000	+	.	gene_id "MSTRG.81756"; transcript_id "MSTRG.81756.8";
13	StringTie	exon	107022426	107023982	1000	+	.	gene_id "MSTRG.81756"; transcript_id "MSTRG.81756.8"; exon_number "1";
13	StringTie	exon	107026399	107026455	1000	+	.	gene_id "MSTRG.81756"; transcript_id "MSTRG.81756.8"; exon_number "2";
13	StringTie	exon	107031724	107032949	1000	+	.	gene_id "MSTRG.81756"; transcript_id "MSTRG.81756.8"; exon_number "3";
13	StringTie	exon	107033265	107033673	1000	+	.	gene_id "MSTRG.81756"; transcript_id "MSTRG.81756.8"; exon_number "4";
13	StringTie	transcript	107022439	107037516	1000	+	.	gene_id "MSTRG.81756"; transcript_id "MSTRG.81756.21";
13	StringTie	exon	107022439	107023151	1000	+	.	gene_id "MSTRG.81756"; transcript_id "MSTRG.81756.21"; exon_number "1";
13	StringTie	exon	107023843	107026455	1000	+	.	gene_id "MSTRG.81756"; transcript_id "MSTRG.81756.21"; exon_number "2";
13	StringTie	exon	107031103	107037516	1000	+	.	gene_id "MSTRG.81756"; transcript_id "MSTRG.81756.21"; exon_number "3";
13	StringTie	transcript	107022439	107037516	1000	+	.	gene_id "MSTRG.81756"; transcript_id "MSTRG.81756.22";
13	StringTie	exon	107022439	107023982	1000	+	.	gene_id "MSTRG.81756"; transcript_id "MSTRG.81756.22"; exon_number "1";
13	StringTie	exon	107026399	107026455	1000	+	.	gene_id "MSTRG.81756"; transcript_id "MSTRG.81756.22"; exon_number "2";
13	StringTie	exon	107028720	107032949	1000	+	.	gene_id "MSTRG.81756"; transcript_id "MSTRG.81756.22"; exon_number "3";
13	StringTie	exon	107034923	107037516	1000	+	.	gene_id "MSTRG.81756"; transcript_id "MSTRG.81756.22"; exon_number "4";
13	StringTie	transcript	107022469	107086022	1000	+	.	gene_id "MSTRG.81756"; transcript_id "MSTRG.81756.24";
13	StringTie	exon	107022469	107032949	1000	+	.	gene_id "MSTRG.81756"; transcript_id "MSTRG.81756.24"; exon_number "1";
13	StringTie	exon	107085991	107086022	1000	+	.	gene_id "MSTRG.81756"; transcript_id "MSTRG.81756.24"; exon_number "2";
14	StringTie	transcript	46379434	46385878	1000	+	.	gene_id "MSTRG.88042"; transcript_id "MSTRG.88042.2";
14	StringTie	exon	46379434	46379641	1000	+	.	gene_id "MSTRG.88042"; transcript_id "MSTRG.88042.2"; exon_number "1";
14	StringTie	exon	46380279	46380386	1000	+	.	gene_id "MSTRG.88042"; transcript_id "MSTRG.88042.2"; exon_number "2";
14	StringTie	exon	46383077	46383217	1000	+	.	gene_id "MSTRG.88042"; transcript_id "MSTRG.88042.2"; exon_number "3";
14	StringTie	exon	46383300	46384362	1000	+	.	gene_id "MSTRG.88042"; transcript_id "MSTRG.88042.2"; exon_number "4";
14	StringTie	exon	46385817	46385878	1000	+	.	gene_id "MSTRG.88042"; transcript_id "MSTRG.88042.2"; exon_number "5";
14	StringTie	transcript	122490586	122504439	1000	+	.	gene_id "MSTRG.96337"; transcript_id "MSTRG.96337.1";
14	StringTie	exon	122490586	122495777	1000	+	.	gene_id "MSTRG.96337"; transcript_id "MSTRG.96337.1"; exon_number "1";
14	StringTie	exon	122495836	122504439	1000	+	.	gene_id "MSTRG.96337"; transcript_id "MSTRG.96337.1"; exon_number "2";
15	StringTie	transcript	25413964	25464944	1000	+	.	gene_id "MSTRG.98692"; transcript_id "MSTRG.98692.1";
15	StringTie	exon	25413964	25414101	1000	+	.	gene_id "MSTRG.98692"; transcript_id "MSTRG.98692.1"; exon_number "1";
15	StringTie	exon	25414147	25415149	1000	+	.	gene_id "MSTRG.98692"; transcript_id "MSTRG.98692.1"; exon_number "2";
15	StringTie	exon	25450495	25451150	1000	+	.	gene_id "MSTRG.98692"; transcript_id "MSTRG.98692.1"; exon_number "3";
15	StringTie	exon	25464051	25464944	1000	+	.	gene_id "MSTRG.98692"; transcript_id "MSTRG.98692.1"; exon_number "4";
15	StringTie	transcript	25413964	25439313	1000	+	.	gene_id "MSTRG.98692"; transcript_id "MSTRG.98692.2";
15	StringTie	exon	25413964	25415149	1000	+	.	gene_id "MSTRG.98692"; transcript_id "MSTRG.98692.2"; exon_number "1";
15	StringTie	exon	25432914	25436083	1000	+	.	gene_id "MSTRG.98692"; transcript_id "MSTRG.98692.2"; exon_number "2";
15	StringTie	exon	25436122	25439313	1000	+	.	gene_id "MSTRG.98692"; transcript_id "MSTRG.98692.2"; exon_number "3";
15	StringTie	transcript	25414132	25427630	1000	+	.	gene_id "MSTRG.98692"; transcript_id "MSTRG.98692.3";
15	StringTie	exon	25414132	25418920	1000	+	.	gene_id "MSTRG.98692"; transcript_id "MSTRG.98692.3"; exon_number "1";
15	StringTie	exon	25419307	25427630	1000	+	.	gene_id "MSTRG.98692"; transcript_id "MSTRG.98692.3"; exon_number "2";
15	StringTie	transcript	25414192	25482868	1000	+	.	gene_id "MSTRG.98692"; transcript_id "MSTRG.98692.4";
15	StringTie	exon	25414192	25415149	1000	+	.	gene_id "MSTRG.98692"; transcript_id "MSTRG.98692.4"; exon_number "1";
15	StringTie	exon	25450495	25451150	1000	+	.	gene_id "MSTRG.98692"; transcript_id "MSTRG.98692.4"; exon_number "2";
15	StringTie	exon	25469551	25469829	1000	+	.	gene_id "MSTRG.98692"; transcript_id "MSTRG.98692.4"; exon_number "3";
15	StringTie	exon	25480534	25482868	1000	+	.	gene_id "MSTRG.98692"; transcript_id "MSTRG.98692.4"; exon_number "4";
15	StringTie	transcript	25414192	25435383	1000	+	.	gene_id "MSTRG.98692"; transcript_id "MSTRG.98692.5";
15	StringTie	exon	25414192	25415149	1000	+	.	gene_id "MSTRG.98692"; transcript_id "MSTRG.98692.5"; exon_number "1";
15	StringTie	exon	25422531	25435383	1000	+	.	gene_id "MSTRG.98692"; transcript_id "MSTRG.98692.5"; exon_number "2";
15	StringTie	transcript	25414192	25481538	1000	+	.	gene_id "MSTRG.98692"; transcript_id "MSTRG.98692.6";
15	StringTie	exon	25414192	25415149	1000	+	.	gene_id "MSTRG.98692"; transcript_id "MSTRG.98692.6"; exon_number "1";
15	StringTie	exon	25469551	25469829	1000	+	.	gene_id "MSTRG.98692"; transcript_id "MSTRG.98692.6"; exon_number "2";
15	StringTie	exon	25480534	25481538	1000	+	.	gene_id "MSTRG.98692"; transcript_id "MSTRG.98692.6"; exon_number "3";
15	StringTie	transcript	25414192	25481538	1000	+	.	gene_id "MSTRG.98692"; transcript_id "MSTRG.98692.7";
15	StringTie	exon	25414192	25415149	1000	+	.	gene_id "MSTRG.98692"; transcript_id "MSTRG.98692.7"; exon_number "1";
15	StringTie	exon	25469551	25469829	1000	+	.	gene_id "MSTRG.98692"; transcript_id "MSTRG.98692.7"; exon_number "2";
15	StringTie	exon	25478940	25481538	1000	+	.	gene_id "MSTRG.98692"; transcript_id "MSTRG.98692.7"; exon_number "3";
15	StringTie	transcript	25414192	25481538	1000	+	.	gene_id "MSTRG.98692"; transcript_id "MSTRG.98692.8";
15	StringTie	exon	25414192	25415149	1000	+	.	gene_id "MSTRG.98692"; transcript_id "MSTRG.98692.8"; exon_number "1";
15	StringTie	exon	25480534	25481538	1000	+	.	gene_id "MSTRG.98692"; transcript_id "MSTRG.98692.8"; exon_number "2";
15	StringTie	transcript	40134975	40148689	1000	+	.	gene_id "MSTRG.100445"; transcript_id "MSTRG.100445.1";
15	StringTie	exon	40134975	40135029	1000	+	.	gene_id "MSTRG.100445"; transcript_id "MSTRG.100445.1"; exon_number "1";
15	StringTie	exon	40142084	40142274	1000	+	.	gene_id "MSTRG.100445"; transcript_id "MSTRG.100445.1"; exon_number "2";
15	StringTie	exon	40144819	40144969	1000	+	.	gene_id "MSTRG.100445"; transcript_id "MSTRG.100445.1"; exon_number "3";
15	StringTie	exon	40148505	40148689	1000	+	.	gene_id "MSTRG.100445"; transcript_id "MSTRG.100445.1"; exon_number "4";
15	StringTie	transcript	84910438	84935256	1000	-	.	gene_id "MSTRG.105698"; transcript_id "MSTRG.105698.2";
15	StringTie	exon	84910438	84914331	1000	-	.	gene_id "MSTRG.105698"; transcript_id "MSTRG.105698.2"; exon_number "1";
15	StringTie	exon	84915895	84920168	1000	-	.	gene_id "MSTRG.105698"; transcript_id "MSTRG.105698.2"; exon_number "2";
15	StringTie	exon	84920233	84921304	1000	-	.	gene_id "MSTRG.105698"; transcript_id "MSTRG.105698.2"; exon_number "3";
15	StringTie	exon	84923067	84923650	1000	-	.	gene_id "MSTRG.105698"; transcript_id "MSTRG.105698.2"; exon_number "4";
15	StringTie	exon	84927368	84927446	1000	-	.	gene_id "MSTRG.105698"; transcript_id "MSTRG.105698.2"; exon_number "5";
15	StringTie	exon	84929372	84929455	1000	-	.	gene_id "MSTRG.105698"; transcript_id "MSTRG.105698.2"; exon_number "6";
15	StringTie	exon	84933535	84933718	1000	-	.	gene_id "MSTRG.105698"; transcript_id "MSTRG.105698.2"; exon_number "7";
15	StringTie	exon	84934864	84935256	1000	-	.	gene_id "MSTRG.105698"; transcript_id "MSTRG.105698.2"; exon_number "8";
15	StringTie	transcript	84910519	84924061	1000	-	.	gene_id "MSTRG.105698"; transcript_id "MSTRG.105698.4";
15	StringTie	exon	84910519	84914331	1000	-	.	gene_id "MSTRG.105698"; transcript_id "MSTRG.105698.4"; exon_number "1";
15	StringTie	exon	84915895	84923587	1000	-	.	gene_id "MSTRG.105698"; transcript_id "MSTRG.105698.4"; exon_number "2";
15	StringTie	exon	84923705	84924061	1000	-	.	gene_id "MSTRG.105698"; transcript_id "MSTRG.105698.4"; exon_number "3";
15	StringTie	transcript	84911886	84923558	1000	-	.	gene_id "MSTRG.105698"; transcript_id "MSTRG.105698.5";
15	StringTie	exon	84911886	84912889	1000	-	.	gene_id "MSTRG.105698"; transcript_id "MSTRG.105698.5"; exon_number "1";
15	StringTie	exon	84912939	84914331	1000	-	.	gene_id "MSTRG.105698"; transcript_id "MSTRG.105698.5"; exon_number "2";
15	StringTie	exon	84915895	84923558	1000	-	.	gene_id "MSTRG.105698"; transcript_id "MSTRG.105698.5"; exon_number "3";
17	StringTie	transcript	46798116	46890474	1000	-	.	gene_id "MSTRG.125365"; transcript_id "MSTRG.125365.7";
17	StringTie	exon	46798116	46801829	1000	-	.	gene_id "MSTRG.125365"; transcript_id "MSTRG.125365.7"; exon_number "1";
17	StringTie	exon	46806552	46806654	1000	-	.	gene_id "MSTRG.125365"; transcript_id "MSTRG.125365.7"; exon_number "2";
17	StringTie	exon	46807396	46807490	1000	-	.	gene_id "MSTRG.125365"; transcript_id "MSTRG.125365.7"; exon_number "3";
17	StringTie	exon	46808349	46808494	1000	-	.	gene_id "MSTRG.125365"; transcript_id "MSTRG.125365.7"; exon_number "4";
17	StringTie	exon	46809568	46809626	1000	-	.	gene_id "MSTRG.125365"; transcript_id "MSTRG.125365.7"; exon_number "5";
17	StringTie	exon	46811924	46812024	1000	-	.	gene_id "MSTRG.125365"; transcript_id "MSTRG.125365.7"; exon_number "6";
17	StringTie	exon	46813933	46814038	1000	-	.	gene_id "MSTRG.125365"; transcript_id "MSTRG.125365.7"; exon_number "7";
17	StringTie	exon	46824450	46826123	1000	-	.	gene_id "MSTRG.125365"; transcript_id "MSTRG.125365.7"; exon_number "8";
17	StringTie	exon	46829912	46829980	1000	-	.	gene_id "MSTRG.125365"; transcript_id "MSTRG.125365.7"; exon_number "9";
17	StringTie	exon	46830065	46830113	1000	-	.	gene_id "MSTRG.125365"; transcript_id "MSTRG.125365.7"; exon_number "10";
17	StringTie	exon	46830951	46830996	1000	-	.	gene_id "MSTRG.125365"; transcript_id "MSTRG.125365.7"; exon_number "11";
17	StringTie	exon	46858436	46858514	1000	-	.	gene_id "MSTRG.125365"; transcript_id "MSTRG.125365.7"; exon_number "12";
17	StringTie	exon	46858666	46858698	1000	-	.	gene_id "MSTRG.125365"; transcript_id "MSTRG.125365.7"; exon_number "13";
17	StringTie	exon	46888682	46890474	1000	-	.	gene_id "MSTRG.125365"; transcript_id "MSTRG.125365.7"; exon_number "14";
17	StringTie	transcript	46798116	46890481	1000	-	.	gene_id "MSTRG.125365"; transcript_id "MSTRG.125365.8";
17	StringTie	exon	46798116	46801829	1000	-	.	gene_id "MSTRG.125365"; transcript_id "MSTRG.125365.8"; exon_number "1";
17	StringTie	exon	46806552	46806654	1000	-	.	gene_id "MSTRG.125365"; transcript_id "MSTRG.125365.8"; exon_number "2";
17	StringTie	exon	46807396	46807490	1000	-	.	gene_id "MSTRG.125365"; transcript_id "MSTRG.125365.8"; exon_number "3";
17	StringTie	exon	46808349	46808494	1000	-	.	gene_id "MSTRG.125365"; transcript_id "MSTRG.125365.8"; exon_number "4";
17	StringTie	exon	46809568	46809626	1000	-	.	gene_id "MSTRG.125365"; transcript_id "MSTRG.125365.8"; exon_number "5";
17	StringTie	exon	46811924	46812024	1000	-	.	gene_id "MSTRG.125365"; transcript_id "MSTRG.125365.8"; exon_number "6";
17	StringTie	exon	46813933	46814038	1000	-	.	gene_id "MSTRG.125365"; transcript_id "MSTRG.125365.8"; exon_number "7";
17	StringTie	exon	46824450	46826123	1000	-	.	gene_id "MSTRG.125365"; transcript_id "MSTRG.125365.8"; exon_number "8";
17	StringTie	exon	46829912	46829980	1000	-	.	gene_id "MSTRG.125365"; transcript_id "MSTRG.125365.8"; exon_number "9";
17	StringTie	exon	46830065	46830113	1000	-	.	gene_id "MSTRG.125365"; transcript_id "MSTRG.125365.8"; exon_number "10";
17	StringTie	exon	46830951	46830996	1000	-	.	gene_id "MSTRG.125365"; transcript_id "MSTRG.125365.8"; exon_number "11";
17	StringTie	exon	46858436	46858698	1000	-	.	gene_id "MSTRG.125365"; transcript_id "MSTRG.125365.8"; exon_number "12";
17	StringTie	exon	46883860	46890481	1000	-	.	gene_id "MSTRG.125365"; transcript_id "MSTRG.125365.8"; exon_number "13";
19	StringTie	transcript	23687374	23731573	1000	+	.	gene_id "MSTRG.144290"; transcript_id "MSTRG.144290.1";
19	StringTie	exon	23687374	23687545	1000	+	.	gene_id "MSTRG.144290"; transcript_id "MSTRG.144290.1"; exon_number "1";
19	StringTie	exon	23694321	23694490	1000	+	.	gene_id "MSTRG.144290"; transcript_id "MSTRG.144290.1"; exon_number "2";
19	StringTie	exon	23703078	23703144	1000	+	.	gene_id "MSTRG.144290"; transcript_id "MSTRG.144290.1"; exon_number "3";
19	StringTie	exon	23705707	23705811	1000	+	.	gene_id "MSTRG.144290"; transcript_id "MSTRG.144290.1"; exon_number "4";
19	StringTie	exon	23708754	23708967	1000	+	.	gene_id "MSTRG.144290"; transcript_id "MSTRG.144290.1"; exon_number "5";
19	StringTie	exon	23717813	23718102	1000	+	.	gene_id "MSTRG.144290"; transcript_id "MSTRG.144290.1"; exon_number "6";
19	StringTie	exon	23720058	23724770	1000	+	.	gene_id "MSTRG.144290"; transcript_id "MSTRG.144290.1"; exon_number "7";
19	StringTie	exon	23725588	23731573	1000	+	.	gene_id "MSTRG.144290"; transcript_id "MSTRG.144290.1"; exon_number "8";
19	StringTie	transcript	23687400	23732215	1000	+	.	gene_id "MSTRG.144290"; transcript_id "MSTRG.144290.2";
19	StringTie	exon	23687400	23687545	1000	+	.	gene_id "MSTRG.144290"; transcript_id "MSTRG.144290.2"; exon_number "1";
19	StringTie	exon	23694321	23694490	1000	+	.	gene_id "MSTRG.144290"; transcript_id "MSTRG.144290.2"; exon_number "2";
19	StringTie	exon	23703078	23703144	1000	+	.	gene_id "MSTRG.144290"; transcript_id "MSTRG.144290.2"; exon_number "3";
19	StringTie	exon	23705707	23705811	1000	+	.	gene_id "MSTRG.144290"; transcript_id "MSTRG.144290.2"; exon_number "4";
19	StringTie	exon	23708754	23708967	1000	+	.	gene_id "MSTRG.144290"; transcript_id "MSTRG.144290.2"; exon_number "5";
19	StringTie	exon	23717813	23718102	1000	+	.	gene_id "MSTRG.144290"; transcript_id "MSTRG.144290.2"; exon_number "6";
19	StringTie	exon	23720058	23726838	1000	+	.	gene_id "MSTRG.144290"; transcript_id "MSTRG.144290.2"; exon_number "7";
19	StringTie	exon	23728712	23732215	1000	+	.	gene_id "MSTRG.144290"; transcript_id "MSTRG.144290.2"; exon_number "8";
19	StringTie	transcript	23687404	23731624	1000	+	.	gene_id "MSTRG.144290"; transcript_id "MSTRG.144290.4";
19	StringTie	exon	23687404	23687545	1000	+	.	gene_id "MSTRG.144290"; transcript_id "MSTRG.144290.4"; exon_number "1";
19	StringTie	exon	23694321	23694490	1000	+	.	gene_id "MSTRG.144290"; transcript_id "MSTRG.144290.4"; exon_number "2";
19	StringTie	exon	23703078	23703144	1000	+	.	gene_id "MSTRG.144290"; transcript_id "MSTRG.144290.4"; exon_number "3";
19	StringTie	exon	23705707	23705811	1000	+	.	gene_id "MSTRG.144290"; transcript_id "MSTRG.144290.4"; exon_number "4";
19	StringTie	exon	23708754	23708967	1000	+	.	gene_id "MSTRG.144290"; transcript_id "MSTRG.144290.4"; exon_number "5";
19	StringTie	exon	23717813	23718102	1000	+	.	gene_id "MSTRG.144290"; transcript_id "MSTRG.144290.4"; exon_number "6";
19	StringTie	exon	23720058	23730673	1000	+	.	gene_id "MSTRG.144290"; transcript_id "MSTRG.144290.4"; exon_number "7";
19	StringTie	exon	23730777	23731624	1000	+	.	gene_id "MSTRG.144290"; transcript_id "MSTRG.144290.4"; exon_number "8";
19	StringTie	transcript	23687621	23734310	1000	+	.	gene_id "MSTRG.144290"; transcript_id "MSTRG.144290.6";
19	StringTie	exon	23687621	23687954	1000	+	.	gene_id "MSTRG.144290"; transcript_id "MSTRG.144290.6"; exon_number "1";
19	StringTie	exon	23694321	23694490	1000	+	.	gene_id "MSTRG.144290"; transcript_id "MSTRG.144290.6"; exon_number "2";
19	StringTie	exon	23703078	23703144	1000	+	.	gene_id "MSTRG.144290"; transcript_id "MSTRG.144290.6"; exon_number "3";
19	StringTie	exon	23705707	23705811	1000	+	.	gene_id "MSTRG.144290"; transcript_id "MSTRG.144290.6"; exon_number "4";
19	StringTie	exon	23708754	23708967	1000	+	.	gene_id "MSTRG.144290"; transcript_id "MSTRG.144290.6"; exon_number "5";
19	StringTie	exon	23717813	23718102	1000	+	.	gene_id "MSTRG.144290"; transcript_id "MSTRG.144290.6"; exon_number "6";
19	StringTie	exon	23720058	23720354	1000	+	.	gene_id "MSTRG.144290"; transcript_id "MSTRG.144290.6"; exon_number "7";
19	StringTie	exon	23720766	23734310	1000	+	.	gene_id "MSTRG.144290"; transcript_id "MSTRG.144290.6"; exon_number "8";
19	StringTie	transcript	41482580	41596158	1000	+	.	gene_id "MSTRG.146428"; transcript_id "MSTRG.146428.1";
19	StringTie	exon	41482580	41482783	1000	+	.	gene_id "MSTRG.146428"; transcript_id "MSTRG.146428.1"; exon_number "1";
19	StringTie	exon	41483527	41483600	1000	+	.	gene_id "MSTRG.146428"; transcript_id "MSTRG.146428.1"; exon_number "2";
19	StringTie	exon	41528021	41528086	1000	+	.	gene_id "MSTRG.146428"; transcript_id "MSTRG.146428.1"; exon_number "3";
19	StringTie	exon	41528561	41528640	1000	+	.	gene_id "MSTRG.146428"; transcript_id "MSTRG.146428.1"; exon_number "4";
19	StringTie	exon	41545875	41546007	1000	+	.	gene_id "MSTRG.146428"; transcript_id "MSTRG.146428.1"; exon_number "5";
19	StringTie	exon	41552449	41552736	1000	+	.	gene_id "MSTRG.146428"; transcript_id "MSTRG.146428.1"; exon_number "6";
19	StringTie	exon	41555608	41555701	1000	+	.	gene_id "MSTRG.146428"; transcript_id "MSTRG.146428.1"; exon_number "7";
19	StringTie	exon	41581778	41596158	1000	+	.	gene_id "MSTRG.146428"; transcript_id "MSTRG.146428.1"; exon_number "8";
19	StringTie	transcript	41482588	41596158	1000	+	.	gene_id "MSTRG.146428"; transcript_id "MSTRG.146428.2";
19	StringTie	exon	41482588	41482783	1000	+	.	gene_id "MSTRG.146428"; transcript_id "MSTRG.146428.2"; exon_number "1";
19	StringTie	exon	41483527	41483600	1000	+	.	gene_id "MSTRG.146428"; transcript_id "MSTRG.146428.2"; exon_number "2";
19	StringTie	exon	41545875	41546007	1000	+	.	gene_id "MSTRG.146428"; transcript_id "MSTRG.146428.2"; exon_number "3";
19	StringTie	exon	41552449	41552736	1000	+	.	gene_id "MSTRG.146428"; transcript_id "MSTRG.146428.2"; exon_number "4";
19	StringTie	exon	41555608	41555701	1000	+	.	gene_id "MSTRG.146428"; transcript_id "MSTRG.146428.2"; exon_number "5";
19	StringTie	exon	41581778	41596158	1000	+	.	gene_id "MSTRG.146428"; transcript_id "MSTRG.146428.2"; exon_number "6";
19	StringTie	transcript	41482645	41595306	1000	+	.	gene_id "MSTRG.146428"; transcript_id "MSTRG.146428.6";
19	StringTie	exon	41482645	41482783	1000	+	.	gene_id "MSTRG.146428"; transcript_id "MSTRG.146428.6"; exon_number "1";
19	StringTie	exon	41483527	41483600	1000	+	.	gene_id "MSTRG.146428"; transcript_id "MSTRG.146428.6"; exon_number "2";
19	StringTie	exon	41528021	41528086	1000	+	.	gene_id "MSTRG.146428"; transcript_id "MSTRG.146428.6"; exon_number "3";
19	StringTie	exon	41528561	41528640	1000	+	.	gene_id "MSTRG.146428"; transcript_id "MSTRG.146428.6"; exon_number "4";
19	StringTie	exon	41545875	41546007	1000	+	.	gene_id "MSTRG.146428"; transcript_id "MSTRG.146428.6"; exon_number "5";
19	StringTie	exon	41581778	41583105	1000	+	.	gene_id "MSTRG.146428"; transcript_id "MSTRG.146428.6"; exon_number "6";
19	StringTie	exon	41583544	41595122	1000	+	.	gene_id "MSTRG.146428"; transcript_id "MSTRG.146428.6"; exon_number "7";
19	StringTie	exon	41595160	41595306	1000	+	.	gene_id "MSTRG.146428"; transcript_id "MSTRG.146428.6"; exon_number "8";
19	StringTie	transcript	41482645	41596158	1000	+	.	gene_id "MSTRG.146428"; transcript_id "MSTRG.146428.8";
19	StringTie	exon	41482645	41482783	1000	+	.	gene_id "MSTRG.146428"; transcript_id "MSTRG.146428.8"; exon_number "1";
19	StringTie	exon	41483527	41483600	1000	+	.	gene_id "MSTRG.146428"; transcript_id "MSTRG.146428.8"; exon_number "2";
19	StringTie	exon	41545875	41546007	1000	+	.	gene_id "MSTRG.146428"; transcript_id "MSTRG.146428.8"; exon_number "3";
19	StringTie	exon	41548057	41548163	1000	+	.	gene_id "MSTRG.146428"; transcript_id "MSTRG.146428.8"; exon_number "4";
19	StringTie	exon	41552449	41552736	1000	+	.	gene_id "MSTRG.146428"; transcript_id "MSTRG.146428.8"; exon_number "5";
19	StringTie	exon	41555608	41555701	1000	+	.	gene_id "MSTRG.146428"; transcript_id "MSTRG.146428.8"; exon_number "6";
19	StringTie	exon	41581778	41596158	1000	+	.	gene_id "MSTRG.146428"; transcript_id "MSTRG.146428.8"; exon_number "7";
19	StringTie	transcript	41482657	41596158	1000	+	.	gene_id "MSTRG.146428"; transcript_id "MSTRG.146428.9";
19	StringTie	exon	41482657	41482783	1000	+	.	gene_id "MSTRG.146428"; transcript_id "MSTRG.146428.9"; exon_number "1";
19	StringTie	exon	41483527	41483600	1000	+	.	gene_id "MSTRG.146428"; transcript_id "MSTRG.146428.9"; exon_number "2";
19	StringTie	exon	41528021	41528086	1000	+	.	gene_id "MSTRG.146428"; transcript_id "MSTRG.146428.9"; exon_number "3";
19	StringTie	exon	41528561	41528640	1000	+	.	gene_id "MSTRG.146428"; transcript_id "MSTRG.146428.9"; exon_number "4";
19	StringTie	exon	41545875	41546007	1000	+	.	gene_id "MSTRG.146428"; transcript_id "MSTRG.146428.9"; exon_number "5";
19	StringTie	exon	41552449	41552736	1000	+	.	gene_id "MSTRG.146428"; transcript_id "MSTRG.146428.9"; exon_number "6";
19	StringTie	exon	41555608	41555701	1000	+	.	gene_id "MSTRG.146428"; transcript_id "MSTRG.146428.9"; exon_number "7";
19	StringTie	exon	41581778	41583210	1000	+	.	gene_id "MSTRG.146428"; transcript_id "MSTRG.146428.9"; exon_number "8";
19	StringTie	exon	41583253	41595122	1000	+	.	gene_id "MSTRG.146428"; transcript_id "MSTRG.146428.9"; exon_number "9";
19	StringTie	exon	41595160	41596158	1000	+	.	gene_id "MSTRG.146428"; transcript_id "MSTRG.146428.9"; exon_number "10";
19	StringTie	transcript	41483013	41596158	1000	+	.	gene_id "MSTRG.146428"; transcript_id "MSTRG.146428.11";
19	StringTie	exon	41483013	41483302	1000	+	.	gene_id "MSTRG.146428"; transcript_id "MSTRG.146428.11"; exon_number "1";
19	StringTie	exon	41483527	41483600	1000	+	.	gene_id "MSTRG.146428"; transcript_id "MSTRG.146428.11"; exon_number "2";
19	StringTie	exon	41552449	41552736	1000	+	.	gene_id "MSTRG.146428"; transcript_id "MSTRG.146428.11"; exon_number "3";
19	StringTie	exon	41555608	41555701	1000	+	.	gene_id "MSTRG.146428"; transcript_id "MSTRG.146428.11"; exon_number "4";
19	StringTie	exon	41581778	41595130	1000	+	.	gene_id "MSTRG.146428"; transcript_id "MSTRG.146428.11"; exon_number "5";
19	StringTie	exon	41595158	41596158	1000	+	.	gene_id "MSTRG.146428"; transcript_id "MSTRG.146428.11"; exon_number "6";
19	StringTie	transcript	41483035	41596158	1000	+	.	gene_id "MSTRG.146428"; transcript_id "MSTRG.146428.12";
19	StringTie	exon	41483035	41483302	1000	+	.	gene_id "MSTRG.146428"; transcript_id "MSTRG.146428.12"; exon_number "1";
19	StringTie	exon	41483527	41483600	1000	+	.	gene_id "MSTRG.146428"; transcript_id "MSTRG.146428.12"; exon_number "2";
19	StringTie	exon	41528021	41528086	1000	+	.	gene_id "MSTRG.146428"; transcript_id "MSTRG.146428.12"; exon_number "3";
19	StringTie	exon	41528561	41528640	1000	+	.	gene_id "MSTRG.146428"; transcript_id "MSTRG.146428.12"; exon_number "4";
19	StringTie	exon	41545875	41546007	1000	+	.	gene_id "MSTRG.146428"; transcript_id "MSTRG.146428.12"; exon_number "5";
19	StringTie	exon	41552449	41552736	1000	+	.	gene_id "MSTRG.146428"; transcript_id "MSTRG.146428.12"; exon_number "6";
19	StringTie	exon	41555608	41555701	1000	+	.	gene_id "MSTRG.146428"; transcript_id "MSTRG.146428.12"; exon_number "7";
19	StringTie	exon	41581778	41596158	1000	+	.	gene_id "MSTRG.146428"; transcript_id "MSTRG.146428.12"; exon_number "8";
19	StringTie	transcript	41483062	41596158	1000	+	.	gene_id "MSTRG.146428"; transcript_id "MSTRG.146428.14";
19	StringTie	exon	41483062	41483298	1000	+	.	gene_id "MSTRG.146428"; transcript_id "MSTRG.146428.14"; exon_number "1";
19	StringTie	exon	41483527	41483600	1000	+	.	gene_id "MSTRG.146428"; transcript_id "MSTRG.146428.14"; exon_number "2";
19	StringTie	exon	41528021	41528086	1000	+	.	gene_id "MSTRG.146428"; transcript_id "MSTRG.146428.14"; exon_number "3";
19	StringTie	exon	41528561	41528640	1000	+	.	gene_id "MSTRG.146428"; transcript_id "MSTRG.146428.14"; exon_number "4";
19	StringTie	exon	41545875	41546007	1000	+	.	gene_id "MSTRG.146428"; transcript_id "MSTRG.146428.14"; exon_number "5";
19	StringTie	exon	41552449	41552736	1000	+	.	gene_id "MSTRG.146428"; transcript_id "MSTRG.146428.14"; exon_number "6";
19	StringTie	exon	41555608	41555701	1000	+	.	gene_id "MSTRG.146428"; transcript_id "MSTRG.146428.14"; exon_number "7";
19	StringTie	exon	41581778	41596158	1000	+	.	gene_id "MSTRG.146428"; transcript_id "MSTRG.146428.14"; exon_number "8";
19	StringTie	transcript	41582370	41596158	1000	+	.	gene_id "MSTRG.146428"; transcript_id "MSTRG.146428.29";
19	StringTie	exon	41582370	41583210	1000	+	.	gene_id "MSTRG.146428"; transcript_id "MSTRG.146428.29"; exon_number "1";
19	StringTie	exon	41583253	41583378	1000	+	.	gene_id "MSTRG.146428"; transcript_id "MSTRG.146428.29"; exon_number "2";
19	StringTie	exon	41583463	41596158	1000	+	.	gene_id "MSTRG.146428"; transcript_id "MSTRG.146428.29"; exon_number "3";
19	StringTie	transcript	41589598	41596065	1000	+	.	gene_id "MSTRG.146428"; transcript_id "MSTRG.146428.32";
19	StringTie	exon	41589598	41594109	1000	+	.	gene_id "MSTRG.146428"; transcript_id "MSTRG.146428.32"; exon_number "1";
19	StringTie	exon	41594141	41596065	1000	+	.	gene_id "MSTRG.146428"; transcript_id "MSTRG.146428.32"; exon_number "2";
2	StringTie	transcript	18019603	18028906	1000	-	.	gene_id "MSTRG.150961"; transcript_id "MSTRG.150961.2";
2	StringTie	exon	18019603	18019805	1000	-	.	gene_id "MSTRG.150961"; transcript_id "MSTRG.150961.2"; exon_number "1";
2	StringTie	exon	18023238	18028238	1000	-	.	gene_id "MSTRG.150961"; transcript_id "MSTRG.150961.2"; exon_number "2";
2	StringTie	exon	18028420	18028906	1000	-	.	gene_id "MSTRG.150961"; transcript_id "MSTRG.150961.2"; exon_number "3";
2	StringTie	transcript	18842258	18999801	1000	+	.	gene_id "MSTRG.151059"; transcript_id "MSTRG.151059.1";
2	StringTie	exon	18842258	18844460	1000	+	.	gene_id "MSTRG.151059"; transcript_id "MSTRG.151059.1"; exon_number "1";
2	StringTie	exon	18845875	18845978	1000	+	.	gene_id "MSTRG.151059"; transcript_id "MSTRG.151059.1"; exon_number "2";
2	StringTie	exon	18847434	18847677	1000	+	.	gene_id "MSTRG.151059"; transcript_id "MSTRG.151059.1"; exon_number "3";
2	StringTie	exon	18852813	18852926	1000	+	.	gene_id "MSTRG.151059"; transcript_id "MSTRG.151059.1"; exon_number "4";
2	StringTie	exon	18866112	18866150	1000	+	.	gene_id "MSTRG.151059"; transcript_id "MSTRG.151059.1"; exon_number "5";
2	StringTie	exon	18872284	18872430	1000	+	.	gene_id "MSTRG.151059"; transcript_id "MSTRG.151059.1"; exon_number "6";
2	StringTie	exon	18889052	18889204	1000	+	.	gene_id "MSTRG.151059"; transcript_id "MSTRG.151059.1"; exon_number "7";
2	StringTie	exon	18906229	18906325	1000	+	.	gene_id "MSTRG.151059"; transcript_id "MSTRG.151059.1"; exon_number "8";
2	StringTie	exon	18908055	18908152	1000	+	.	gene_id "MSTRG.151059"; transcript_id "MSTRG.151059.1"; exon_number "9";
2	StringTie	exon	18997852	18999801	1000	+	.	gene_id "MSTRG.151059"; transcript_id "MSTRG.151059.1"; exon_number "10";
2	StringTie	transcript	32574184	32576294	1000	-	.	gene_id "MSTRG.153275"; transcript_id "MSTRG.153275.7";
2	StringTie	exon	32574184	32575855	1000	-	.	gene_id "MSTRG.153275"; transcript_id "MSTRG.153275.7"; exon_number "1";
2	StringTie	exon	32575951	32576294	1000	-	.	gene_id "MSTRG.153275"; transcript_id "MSTRG.153275.7"; exon_number "2";
2	StringTie	transcript	103992489	104056506	1000	-	.	gene_id "MSTRG.160928"; transcript_id "MSTRG.160928.14";
2	StringTie	exon	103992489	103992823	1000	-	.	gene_id "MSTRG.160928"; transcript_id "MSTRG.160928.14"; exon_number "1";
2	StringTie	exon	103993885	103993912	1000	-	.	gene_id "MSTRG.160928"; transcript_id "MSTRG.160928.14"; exon_number "2";
2	StringTie	exon	104026130	104026212	1000	-	.	gene_id "MSTRG.160928"; transcript_id "MSTRG.160928.14"; exon_number "3";
2	StringTie	exon	104027222	104027287	1000	-	.	gene_id "MSTRG.160928"; transcript_id "MSTRG.160928.14"; exon_number "4";
2	StringTie	exon	104027778	104027966	1000	-	.	gene_id "MSTRG.160928"; transcript_id "MSTRG.160928.14"; exon_number "5";
2	StringTie	exon	104030344	104030433	1000	-	.	gene_id "MSTRG.160928"; transcript_id "MSTRG.160928.14"; exon_number "6";
2	StringTie	exon	104033596	104033759	1000	-	.	gene_id "MSTRG.160928"; transcript_id "MSTRG.160928.14"; exon_number "7";
2	StringTie	exon	104042904	104043018	1000	-	.	gene_id "MSTRG.160928"; transcript_id "MSTRG.160928.14"; exon_number "8";
2	StringTie	exon	104045658	104045862	1000	-	.	gene_id "MSTRG.160928"; transcript_id "MSTRG.160928.14"; exon_number "9";
2	StringTie	exon	104047934	104047979	1000	-	.	gene_id "MSTRG.160928"; transcript_id "MSTRG.160928.14"; exon_number "10";
2	StringTie	exon	104050271	104050355	1000	-	.	gene_id "MSTRG.160928"; transcript_id "MSTRG.160928.14"; exon_number "11";
2	StringTie	exon	104051134	104051256	1000	-	.	gene_id "MSTRG.160928"; transcript_id "MSTRG.160928.14"; exon_number "12";
2	StringTie	exon	104053365	104053480	1000	-	.	gene_id "MSTRG.160928"; transcript_id "MSTRG.160928.14"; exon_number "13";
2	StringTie	exon	104054836	104055026	1000	-	.	gene_id "MSTRG.160928"; transcript_id "MSTRG.160928.14"; exon_number "14";
2	StringTie	exon	104056001	104056506	1000	-	.	gene_id "MSTRG.160928"; transcript_id "MSTRG.160928.14"; exon_number "15";
3	StringTie	transcript	36448923	36482299	1000	+	.	gene_id "MSTRG.175533"; transcript_id "MSTRG.175533.1";
3	StringTie	exon	36448923	36449406	1000	+	.	gene_id "MSTRG.175533"; transcript_id "MSTRG.175533.1"; exon_number "1";
3	StringTie	exon	36450312	36450434	1000	+	.	gene_id "MSTRG.175533"; transcript_id "MSTRG.175533.1"; exon_number "2";
3	StringTie	exon	36450638	36450696	1000	+	.	gene_id "MSTRG.175533"; transcript_id "MSTRG.175533.1"; exon_number "3";
3	StringTie	exon	36452187	36452282	1000	+	.	gene_id "MSTRG.175533"; transcript_id "MSTRG.175533.1"; exon_number "4";
3	StringTie	exon	36453471	36453564	1000	+	.	gene_id "MSTRG.175533"; transcript_id "MSTRG.175533.1"; exon_number "5";
3	StringTie	exon	36456993	36457049	1000	+	.	gene_id "MSTRG.175533"; transcript_id "MSTRG.175533.1"; exon_number "6";
3	StringTie	exon	36457459	36457538	1000	+	.	gene_id "MSTRG.175533"; transcript_id "MSTRG.175533.1"; exon_number "7";
3	StringTie	exon	36460443	36460533	1000	+	.	gene_id "MSTRG.175533"; transcript_id "MSTRG.175533.1"; exon_number "8";
3	StringTie	exon	36461881	36461994	1000	+	.	gene_id "MSTRG.175533"; transcript_id "MSTRG.175533.1"; exon_number "9";
3	StringTie	exon	36463968	36464062	1000	+	.	gene_id "MSTRG.175533"; transcript_id "MSTRG.175533.1"; exon_number "10";
3	StringTie	exon	36465251	36465335	1000	+	.	gene_id "MSTRG.175533"; transcript_id "MSTRG.175533.1"; exon_number "11";
3	StringTie	exon	36475430	36476239	1000	+	.	gene_id "MSTRG.175533"; transcript_id "MSTRG.175533.1"; exon_number "12";
3	StringTie	exon	36479484	36479567	1000	+	.	gene_id "MSTRG.175533"; transcript_id "MSTRG.175533.1"; exon_number "13";
3	StringTie	exon	36481776	36482299	1000	+	.	gene_id "MSTRG.175533"; transcript_id "MSTRG.175533.1"; exon_number "14";
4	StringTie	transcript	147522566	147549923	1000	+	.	gene_id "MSTRG.207440"; transcript_id "MSTRG.207440.49";
4	StringTie	exon	147522566	147539262	1000	+	.	gene_id "MSTRG.207440"; transcript_id "MSTRG.207440.49"; exon_number "1";
4	StringTie	exon	147540257	147542796	1000	+	.	gene_id "MSTRG.207440"; transcript_id "MSTRG.207440.49"; exon_number "2";
4	StringTie	exon	147544578	147549923	1000	+	.	gene_id "MSTRG.207440"; transcript_id "MSTRG.207440.49"; exon_number "3";
6	StringTie	transcript	122390084	122392687	1000	+	.	gene_id "MSTRG.241163"; transcript_id "MSTRG.241163.1";
6	StringTie	exon	122390084	122390195	1000	+	.	gene_id "MSTRG.241163"; transcript_id "MSTRG.241163.1"; exon_number "1";
6	StringTie	exon	122390656	122390933	1000	+	.	gene_id "MSTRG.241163"; transcript_id "MSTRG.241163.1"; exon_number "2";
6	StringTie	exon	122392024	122392687	1000	+	.	gene_id "MSTRG.241163"; transcript_id "MSTRG.241163.1"; exon_number "3";
6	StringTie	transcript	122390129	122392687	1000	+	.	gene_id "MSTRG.241163"; transcript_id "MSTRG.241163.2";
6	StringTie	exon	122390129	122390211	1000	+	.	gene_id "MSTRG.241163"; transcript_id "MSTRG.241163.2"; exon_number "1";
6	StringTie	exon	122390656	122390933	1000	+	.	gene_id "MSTRG.241163"; transcript_id "MSTRG.241163.2"; exon_number "2";
6	StringTie	exon	122392024	122392687	1000	+	.	gene_id "MSTRG.241163"; transcript_id "MSTRG.241163.2"; exon_number "3";
6	StringTie	transcript	122390129	122392687	1000	+	.	gene_id "MSTRG.241163"; transcript_id "MSTRG.241163.3";
6	StringTie	exon	122390129	122390211	1000	+	.	gene_id "MSTRG.241163"; transcript_id "MSTRG.241163.3"; exon_number "1";
6	StringTie	exon	122390656	122391127	1000	+	.	gene_id "MSTRG.241163"; transcript_id "MSTRG.241163.3"; exon_number "2";
6	StringTie	exon	122392024	122392687	1000	+	.	gene_id "MSTRG.241163"; transcript_id "MSTRG.241163.3"; exon_number "3";
6	StringTie	transcript	122390139	122393633	1000	+	.	gene_id "MSTRG.241163"; transcript_id "MSTRG.241163.4";
6	StringTie	exon	122390139	122390195	1000	+	.	gene_id "MSTRG.241163"; transcript_id "MSTRG.241163.4"; exon_number "1";
6	StringTie	exon	122392024	122393633	1000	+	.	gene_id "MSTRG.241163"; transcript_id "MSTRG.241163.4"; exon_number "2";
6	StringTie	transcript	122390139	122392687	1000	+	.	gene_id "MSTRG.241163"; transcript_id "MSTRG.241163.5";
6	StringTie	exon	122390139	122390195	1000	+	.	gene_id "MSTRG.241163"; transcript_id "MSTRG.241163.5"; exon_number "1";
6	StringTie	exon	122390656	122391127	1000	+	.	gene_id "MSTRG.241163"; transcript_id "MSTRG.241163.5"; exon_number "2";
6	StringTie	exon	122392024	122392687	1000	+	.	gene_id "MSTRG.241163"; transcript_id "MSTRG.241163.5"; exon_number "3";
7	StringTie	transcript	24853758	24862697	1000	+	.	gene_id "MSTRG.247166"; transcript_id "MSTRG.247166.1";
7	StringTie	exon	24853758	24854072	1000	+	.	gene_id "MSTRG.247166"; transcript_id "MSTRG.247166.1"; exon_number "1";
7	StringTie	exon	24854244	24854315	1000	+	.	gene_id "MSTRG.247166"; transcript_id "MSTRG.247166.1"; exon_number "2";
7	StringTie	exon	24862192	24862697	1000	+	.	gene_id "MSTRG.247166"; transcript_id "MSTRG.247166.1"; exon_number "3";
7	StringTie	transcript	83148644	83179320	1000	+	.	gene_id "MSTRG.254461"; transcript_id "MSTRG.254461.2";
7	StringTie	exon	83148644	83148700	1000	+	.	gene_id "MSTRG.254461"; transcript_id "MSTRG.254461.2"; exon_number "1";
7	StringTie	exon	83149104	83149203	1000	+	.	gene_id "MSTRG.254461"; transcript_id "MSTRG.254461.2"; exon_number "2";
7	StringTie	exon	83155177	83155243	1000	+	.	gene_id "MSTRG.254461"; transcript_id "MSTRG.254461.2"; exon_number "3";
7	StringTie	exon	83155733	83155936	1000	+	.	gene_id "MSTRG.254461"; transcript_id "MSTRG.254461.2"; exon_number "4";
7	StringTie	exon	83178626	83179320	1000	+	.	gene_id "MSTRG.254461"; transcript_id "MSTRG.254461.2"; exon_number "5";
7	StringTie	transcript	83543040	83550181	1000	-	.	gene_id "MSTRG.254539"; transcript_id "MSTRG.254539.4";
7	StringTie	exon	83543040	83543107	1000	-	.	gene_id "MSTRG.254539"; transcript_id "MSTRG.254539.4"; exon_number "1";
7	StringTie	exon	83545344	83545448	1000	-	.	gene_id "MSTRG.254539"; transcript_id "MSTRG.254539.4"; exon_number "2";
7	StringTie	exon	83548733	83550181	1000	-	.	gene_id "MSTRG.254539"; transcript_id "MSTRG.254539.4"; exon_number "3";
7	StringTie	transcript	127983079	128012866	1000	+	.	gene_id "MSTRG.260115"; transcript_id "MSTRG.260115.1";
7	StringTie	exon	127983079	127983458	1000	+	.	gene_id "MSTRG.260115"; transcript_id "MSTRG.260115.1"; exon_number "1";
7	StringTie	exon	127983774	128004069	1000	+	.	gene_id "MSTRG.260115"; transcript_id "MSTRG.260115.1"; exon_number "2";
7	StringTie	exon	128004477	128004873	1000	+	.	gene_id "MSTRG.260115"; transcript_id "MSTRG.260115.1"; exon_number "3";
7	StringTie	exon	128007606	128007701	1000	+	.	gene_id "MSTRG.260115"; transcript_id "MSTRG.260115.1"; exon_number "4";
7	StringTie	exon	128007787	128008017	1000	+	.	gene_id "MSTRG.260115"; transcript_id "MSTRG.260115.1"; exon_number "5";
7	StringTie	exon	128008452	128008474	1000	+	.	gene_id "MSTRG.260115"; transcript_id "MSTRG.260115.1"; exon_number "6";
7	StringTie	exon	128009072	128009190	1000	+	.	gene_id "MSTRG.260115"; transcript_id "MSTRG.260115.1"; exon_number "7";
7	StringTie	exon	128009887	128012866	1000	+	.	gene_id "MSTRG.260115"; transcript_id "MSTRG.260115.1"; exon_number "8";
8	StringTie	transcript	4675665	4678365	1000	-	.	gene_id "MSTRG.262868"; transcript_id "MSTRG.262868.2";
8	StringTie	exon	4675665	4675723	1000	-	.	gene_id "MSTRG.262868"; transcript_id "MSTRG.262868.2"; exon_number "1";
8	StringTie	exon	4676679	4678365	1000	-	.	gene_id "MSTRG.262868"; transcript_id "MSTRG.262868.2"; exon_number "2";
8	StringTie	transcript	70863116	70865571	1000	+	.	gene_id "MSTRG.270136"; transcript_id "MSTRG.270136.1";
8	StringTie	exon	70863116	70864512	1000	+	.	gene_id "MSTRG.270136"; transcript_id "MSTRG.270136.1"; exon_number "1";
8	StringTie	exon	70864879	70865571	1000	+	.	gene_id "MSTRG.270136"; transcript_id "MSTRG.270136.1"; exon_number "2";
8	StringTie	transcript	84063561	84073943	1000	-	.	gene_id "MSTRG.271722"; transcript_id "MSTRG.271722.1";
8	StringTie	exon	84063561	84067048	1000	-	.	gene_id "MSTRG.271722"; transcript_id "MSTRG.271722.1"; exon_number "1";
8	StringTie	exon	84073731	84073943	1000	-	.	gene_id "MSTRG.271722"; transcript_id "MSTRG.271722.1"; exon_number "2";
8	StringTie	transcript	84063620	84067140	1000	-	.	gene_id "MSTRG.271722"; transcript_id "MSTRG.271722.3";
8	StringTie	exon	84063620	84065566	1000	-	.	gene_id "MSTRG.271722"; transcript_id "MSTRG.271722.3"; exon_number "1";
8	StringTie	exon	84065612	84067140	1000	-	.	gene_id "MSTRG.271722"; transcript_id "MSTRG.271722.3"; exon_number "2";
8	StringTie	transcript	84065246	84067177	1000	-	.	gene_id "MSTRG.271722"; transcript_id "MSTRG.271722.6";
8	StringTie	exon	84065246	84065564	1000	-	.	gene_id "MSTRG.271722"; transcript_id "MSTRG.271722.6"; exon_number "1";
8	StringTie	exon	84065595	84067177	1000	-	.	gene_id "MSTRG.271722"; transcript_id "MSTRG.271722.6"; exon_number "2";
9	StringTie	transcript	13416390	13507313	1000	+	.	gene_id "MSTRG.279011"; transcript_id "MSTRG.279011.17";
9	StringTie	exon	13416390	13446853	1000	+	.	gene_id "MSTRG.279011"; transcript_id "MSTRG.279011.17"; exon_number "1";
9	StringTie	exon	13446922	13471890	1000	+	.	gene_id "MSTRG.279011"; transcript_id "MSTRG.279011.17"; exon_number "2";
9	StringTie	exon	13492800	13505454	1000	+	.	gene_id "MSTRG.279011"; transcript_id "MSTRG.279011.17"; exon_number "3";
9	StringTie	exon	13505499	13507313	1000	+	.	gene_id "MSTRG.279011"; transcript_id "MSTRG.279011.17"; exon_number "4";
9	StringTie	transcript	43252960	43280075	1000	+	.	gene_id "MSTRG.282692"; transcript_id "MSTRG.282692.1";
9	StringTie	exon	43252960	43254665	1000	+	.	gene_id "MSTRG.282692"; transcript_id "MSTRG.282692.1"; exon_number "1";
9	StringTie	exon	43254819	43260059	1000	+	.	gene_id "MSTRG.282692"; transcript_id "MSTRG.282692.1"; exon_number "2";
9	StringTie	exon	43265316	43265486	1000	+	.	gene_id "MSTRG.282692"; transcript_id "MSTRG.282692.1"; exon_number "3";
9	StringTie	exon	43279854	43280075	1000	+	.	gene_id "MSTRG.282692"; transcript_id "MSTRG.282692.1"; exon_number "4";

## Sheet: proteomic evidence
Protein_ID	Protein_length	Peptide_sequence	Start	End	Source
ENSMUSP00000024896	102	MSMTQIQRNHSLMDTLFK	1	18	PRD000659|22104|; PRD000659|22110|
ENSMUSP00000024896	102	HSHAEELHLWDTIKNGSNSR	20	39	PRD000127|9817|cerebral cortex
ENSMUSP00000024896	102	SHGNRSLEQGPAK	86	98	PRD000127|9788|; PRD000659|22060|; PRD000659|22082|; PRD000659|22100|
ENSMUSP00000024896	102	SLEQGPAKWLGG	91	102	PRD000127|9802|cerebral cortex; PRD000659|22120|
ENSMUSP00000027102	167	RGQPALFSTDLKPNCPRR	8	25	PRD000659|22061|; PRD000659|22066|; PRD000659|22083|; PRD000659|22093|; PRD000659|22102|; PRD000659|22103|; PRD000659|22125|
ENSMUSP00000027102	167	KLESAVLHNFPK	36	47	PRD000127|9788|; PRD000127|9790|; PRD000127|9817|cerebral cortex; PRD000127|9819|cerebral cortex; PRD000400|16807|
ENSMUSP00000027102	167	LESAVLHNFPK	37	47	PRD000127|9788|; PRD000659|22067|; PRD000659|22115|; PRD000659|22118|; PRD000659|22130|
ENSMUSP00000027102	167	SKENIGKLSAR	48	58	PRD000400|16754|
ENSMUSP00000027102	167	ENIGKLSAR	50	58	PRD000127|9814|cerebral cortex
ENSMUSP00000027102	167	SQKDNMIPGWEQCLR	59	73	PRD000319|16749|
ENSMUSP00000027102	167	DNMIPGWEQCLR	62	73	PRD000400|16776|; PRD000400|16817|
ENSMUSP00000027102	167	TCSELWEKNR	78	87	PRD000659|22070|; PRD000659|22084|
ENSMUSP00000027102	167	KTKGGGMVSLLPCLLEK	97	113	PRD000659|22093|
ENSMUSP00000027102	167	TKGGGMVSLLPCLLEKCAESK	98	118	PRD000319|16810|; PRD000659|22129|
ENSMUSP00000027102	167	CAESKITCQSSLK	114	126	PRD000659|22057|; PRD000659|22075|; PRD000659|22079|; PRD000659|22085|; PRD000659|22091|; PRD000659|22103|; PRD000659|22104|; PRD000659|22105|; PRD000659|22106|; PRD000659|22108|; PRD000659|22109|; PRD000659|22128|
ENSMUSP00000027102	167	CAESKITCQSSLKK	114	127	PRD000319|16749|; PRD000400|16750|; PRD000400|16757|; PRD000400|16785|; PRD000400|16788|; PRD000400|16789|
ENSMUSP00000027102	167	CAESKITCQSSLKKPLVR	114	131	PRD000659|22068|
ENSMUSP00000027102	167	CAESKITCQSSLKKPLVRMTRHCHR	114	138	PRD000659|22095|
ENSMUSP00000027102	167	ITCQSSLK	119	126	PRD000659|22069|
ENSMUSP00000027102	167	ITCQSSLKKPLVR	119	131	PRD000659|22058|
ENSMUSP00000028069	123	MHGAAR	1	6	PRD000659|22105|
ENSMUSP00000028069	123	NVREPPLPVPR	7	17	PRD000045|3266|; PRD000659|22058|; PRD000659|22062|; PRD000659|22079|
ENSMUSP00000028069	123	EPPLPVPRAGEFVGPR	10	25	PRD000127|9807|cerebral cortex
ENSMUSP00000028069	123	LELPNLLYPGWAFPCYR	55	71	PRD000659|22075|; PRD000659|22085|; PRD000659|22095|; PRD000659|22102|
ENSMUSP00000028069	123	ILECHSQPTLGFFTETPALVK	72	92	PRD000127|9786|
ENSMUSP00000029268	129	AEMVSLPNSACNFK	17	30	PRD000127|9790|
ENSMUSP00000029268	129	AEMVSLPNSACNFKDPRCKPPDLLHTHGR	17	45	PRD000419|17117|
ENSMUSP00000029268	129	RKGPPGYKRPSTR	72	84	PRD000659|22106|
ENSMUSP00000029268	129	GPPGYK	74	79	PRD000127|9815|cerebral cortex
ENSMUSP00000029268	129	GPPGYKRPSTR	74	84	PRD000127|9798|cerebral cortex
ENSMUSP00000029268	129	CVVGRVCWPQMTHRPGIPR	85	103	PRD000659|22072|
ENSMUSP00000029268	129	VCWPQMTHRPGIPRGHPRR	90	108	PRD000659|22115|
ENSMUSP00000029268	129	GNEEGKHANK	114	123	PRD000659|22093|; PRD000659|22119|
ENSMUSP00000031330	119	KTGIKFLSESLK	45	56	PRD000659|22100|
ENSMUSP00000031330	119	KTGIKFLSESLKIMLDIER	45	63	PRD000400|16728|; PRD000400|16755|; PRD000400|16762|; PRD000400|16786|; PRD000400|16789|; PRD000659|22057|; PRD000659|22079|; PRD000659|22080|; PRD000659|22105|; PRD000659|22106|; PRD000659|22118|; PRD000659|22124|
ENSMUSP00000031330	119	FLSESLKIMLDIER	50	63	PRD000127|9807|cerebral cortex
ENSMUSP00000031330	119	FLSESLKIMLDIERKK	50	65	PRD000400|16767|
ENSMUSP00000031330	119	IASEICGER	66	74	PRD000659|22075|
ENSMUSP00000040998	102	LTGINSHSQVSGK	3	15	PRD000659|22094|
ENSMUSP00000040998	102	DLESSESPLSAGDGDSDANPAFGAIPPSADEAKK	16	49	PRD000127|9817|cerebral cortex
ENSMUSP00000040998	102	KIQENKTPIMIWEIGKKFR	50	68	PRD000659|22114|
ENSMUSP00000040998	102	TPIMIWEIGKKFR	56	68	PRD000659|22122|
ENSMUSP00000040998	102	FRANQRTHSYK	67	77	PRD000419|17116|
ENSMUSP00000040998	102	YGQRVVIR	94	101	PRD000127|9810|cerebral cortex; PRD000127|9818|cerebral cortex
ENSMUSP00000042930	102	MWILWDISKTLMTQAGLMK	1	19	PRD000400|16765|; PRD000400|16786|; PRD000659|22070|; PRD000659|22090|; PRD000659|22111|
ENSMUSP00000042930	102	TLMTQAGLMK	10	19	PRD000055|3534|erythroid lineage cell; PRD000659|22119|
ENSMUSP00000042930	102	CLLDAHPAFPPLSR	20	33	PRD000127|9801|cerebral cortex; PRD000659|22096|
ENSMUSP00000042930	102	DPSVKNGR	36	43	PRD000127|9817|cerebral cortex
ENSMUSP00000042930	102	DPSVKNGRR	36	44	PRD000659|22065|; PRD000659|22116|
ENSMUSP00000043464	102	MISYRVAAKLK	1	11	PRD000659|22082|; PRD000659|22083|; PRD000659|22118|; PRD000659|22128|
ENSMUSP00000043464	102	MISYRVAAKLKFHK	1	14	PRD000319|16811|; PRD000659|22060|
ENSMUSP00000043464	102	LFCNLTTLTAPNR	40	52	PRD000659|22119|
ENSMUSP00000049734	136	EAQLSLDVETGVHGPASDAR	68	87	PRD000127|9805|cerebral cortex
ENSMUSP00000049734	136	FGESCGLEYSTQASLNILIAKK	88	109	PRD000127|9792|; PRD000127|9793|; PRD000127|9819|cerebral cortex
ENSMUSP00000049734	136	CGVPQLSAR	110	118	PRD000659|22082|
ENSMUSP00000050112	178	MSLLGSGVLK	1	10	PRD000659|22097|; PRD000659|22100|
ENSMUSP00000050112	178	MSLLGSGVLKERESR	1	15	PRD000659|22058|
ENSMUSP00000050112	178	ERESRAWVWR	11	20	PRD000659|22091|; PRD000659|22099|
ENSMUSP00000050112	178	GSETLVVILARPK	21	33	PRD000127|9807|cerebral cortex; PRD000659|22085|
ENSMUSP00000050112	178	QGDFLLGVWRPLR	91	103	PRD000127|9788|
ENSMUSP00000050112	178	IAVPPRQSPSPAALR	125	139	PRD000659|22073|; PRD000659|22098|
ENSMUSP00000050112	178	IAVPPRQSPSPAALREQRR	125	143	PRD000659|22067|
ENSMUSP00000050112	178	GWDAPATGAGCERPSHRGAAGGR	156	178	PRD000127|9818|cerebral cortex
ENSMUSP00000050697	155	WSYMPEAIAMAHRSVLSTRPK	9	29	PRD000659|22072|
ENSMUSP00000050697	155	ELLGLWILTNSASSR	122	136	PRD000127|9818|cerebral cortex
ENSMUSP00000050697	155	KFISALEKPYR	137	147	PRD000659|22085|
ENSMUSP00000050697	155	KFISALEKPYRSSVLLKVF	137	155	PRD000400|16817|
ENSMUSP00000051312	103	RSQILQGSLLLFCCPLIAPR	11	30	PRD000319|16749|; PRD000400|16727|; PRD000400|16783|
ENSMUSP00000051312	103	ICAEAIIR	81	88	PRD000659|22073|; PRD000659|22094|
ENSMUSP00000052388	112	MDVFGADAAIHR	1	12	PRD000127|9793|; PRD000127|9817|cerebral cortex; PRD000659|22083|; PRD000659|22087|; PRD000659|22090|
ENSMUSP00000052388	112	MDVFGADAAIHRAHVLSISAFSR	1	23	PRD000127|9791|; PRD000127|9792|; PRD000127|9819|cerebral cortex
ENSMUSP00000052388	112	MLRNAGCCR	32	40	PRD000419|17117|; PRD000659|22090|
ENSMUSP00000052388	112	MLRNAGCCRTCAETAVWSWK	32	51	PRD000659|22106|
ENSMUSP00000052388	112	RNAGCCRTCAETAVWSWKKVGGDEGRWGCGVSGVPW	34	69	PRD000400|16702|
ENSMUSP00000052388	112	NAGCCRTCAETAVWSWK	35	51	PRD000659|22101|
ENSMUSP00000052388	112	NAGCCRTCAETAVWSWKKVGGDEGR	35	59	PRD000319|16811|
ENSMUSP00000052388	112	TCAETAVWSWK	41	51	PRD000659|22128|
ENSMUSP00000052388	112	VGGDEGRWGCGVSGVPWASPAGPCAFCAR	53	81	PRD000127|9809|cerebral cortex
ENSMUSP00000052388	112	WGCGVSGVPWASPAGPCAFCAR	60	81	PRD000127|9788|
ENSMUSP00000052388	112	ELCSARPTGQRWTDSAFNCHR	82	102	PRD000127|9788|; PRD000127|9793|
ENSMUSP00000052388	112	WTDSAFNCHR	93	102	PRD000659|22131|
ENSMUSP00000052388	112	SPNDLSCFPG	103	112	PRD000127|9796|
ENSMUSP00000052460	141	HLTSCGKQEIPR	7	18	PRD000659|22070|; PRD000659|22094|
ENSMUSP00000052460	141	EEGSNYNSQHALELLNHNFLR	19	39	PRD000127|9798|cerebral cortex
ENSMUSP00000052460	141	KSDRSAAAAGVDGRCSPVR	50	68	PRD000659|22098|
ENSMUSP00000052460	141	KSDRSAAAAGVDGRCSPVRK	50	69	PRD000659|22131|
ENSMUSP00000052460	141	SAAAAGVDGRCSPVR	54	68	PRD000127|9787|; PRD000127|9789|; PRD000659|22100|
ENSMUSP00000052460	141	CSPVRKLRLMR	64	74	PRD000659|22080|; PRD000659|22121|
ENSMUSP00000052460	141	LMRAPSCSLFPVVPNGTVTDGTER	72	95	PRD000127|9813|cerebral cortex
ENSMUSP00000052460	141	APSCSLFPVVPNGTVTDGTER	75	95	PRD000127|9786|
ENSMUSP00000052460	141	APSCSLFPVVPNGTVTDGTERLPVGGGSPSAAAAEER	75	111	PRD000127|9804|cerebral cortex; PRD000127|9805|cerebral cortex
ENSMUSP00000052460	141	LPVGGGSPSAAAAEER	96	111	PRD000127|9792|; PRD000127|9793|; PRD000127|9799|cerebral cortex; PRD000127|9800|cerebral cortex; PRD000127|9801|cerebral cortex; PRD000127|9808|cerebral cortex; PRD000659|22084|; PRD000659|22126|
ENSMUSP00000052460	141	LPVGGGSPSAAAAEERSGSGK	96	116	PRD000659|22103|
ENSMUSP00000052846	126	HISFSQQFSNAGLLAVKGK	13	31	PRD000127|9788|
ENSMUSP00000052846	126	GSVPAFKPNRDIAHQSQAK	49	67	PRD000055|3534|erythroid lineage cell
ENSMUSP00000052846	126	SWYLDWSLCELPRLPVATVWVEASMIR	68	94	PRD000127|9797|
ENSMUSP00000052846	126	FQVPPKSLEVCDALL	112	126	PRD000127|9802|cerebral cortex
ENSMUSP00000052846	126	SLEVCDALL	118	126	PRD000659|22120|
ENSMUSP00000054793	111	MIEPTDTLQVPYQKDPWQIYCEDFPFGSISVACDFFK	1	37	PRD000127|9803|cerebral cortex
ENSMUSP00000054793	111	DPWQIYCEDFPFGSISVACDFFK	15	37	PRD000127|9791|; PRD000127|9792|
ENSMUSP00000054793	111	SCECVCFLGYILR	59	71	PRD000659|22109|
ENSMUSP00000054793	111	KVMRCDIVQEMC	100	111	PRD000659|22085|; PRD000659|22092|
ENSMUSP00000054793	111	VMRCDIVQEMC	101	111	PRD000659|22092|; PRD000659|22101|
ENSMUSP00000057719	240	HSFQRQQKASGR	41	52	PRD000419|17117|
ENSMUSP00000057719	240	HSFQRQQKASGRGDSFTADR	41	60	PRD000400|16792|; PRD000400|16794|; PRD000400|16800|; PRD000400|16815|
ENSMUSP00000057719	240	EVGGGTYLCLSLSEPR	81	96	PRD000659|22074|
ENSMUSP00000057719	240	EVGGGTYLCLSLSEPRLISGSPTIPYFLVFENLGLFSR	81	118	PRD000127|9801|cerebral cortex
ENSMUSP00000057719	240	LISGSPTIPYFLVFENLGLFSR	97	118	PRD000127|9809|cerebral cortex
ENSMUSP00000058311	146	MAARGSEFR	1	9	PRD000319|16811|
ENSMUSP00000058311	146	ILSLYDASPEPDLGICVPR	79	97	PRD000659|22122|
ENSMUSP00000058311	146	GMFRYPNLTNKK	110	121	PRD000659|22084|
ENSMUSP00000058311	146	YPNLTNKKCQIR	114	125	PRD000659|22059|
ENSMUSP00000059458	113	ADDAKSLLALPSR	57	69	PRD000659|22098|
ENSMUSP00000059458	113	SLLALPSRLLPRPCEGSCQVWVMER	62	86	PRD000127|9813|cerebral cortex
ENSMUSP00000059458	113	GGALENFQTTEAP	101	113	PRD000400|16783|; PRD000659|22088|; PRD000659|22094|
ENSMUSP00000061176	123	WVPRVVSSLWH	113	123	PRD000659|22093|
ENSMUSP00000061324	113	EAWEIQK	7	13	PRD000659|22074|
ENSMUSP00000061324	113	TSQVSHLRGLTVPCSTGSITENPDGK	14	39	PRD000127|9809|cerebral cortex
ENSMUSP00000061324	113	LAGALQCAVDVSGIQIVGCR	43	62	PRD000127|9811|cerebral cortex; PRD000400|16790|
ENSMUSP00000061324	113	MMRTWLLQPVLTHGDLR	76	92	PRD000659|22084|
ENSMUSP00000061324	113	TWLLQPVLTHGDLR	79	92	PRD000127|9790|; PRD000127|9812|cerebral cortex
ENSMUSP00000061324	113	TWLLQPVLTHGDLRNHSPAVPIMPDCDCPYSR	79	110	PRD000127|9787|
ENSMUSP00000061324	113	THGDLRNHSPAVPIMPDCDCPY	87	108	PRD000400|16704|
ENSMUSP00000061324	113	NHSPAVPIMPDCDCPYSR	93	110	PRD000319|16749|
ENSMUSP00000062888	128	MQMTEGEVFSILSSIPAAPFK	1	21	PRD000127|9813|cerebral cortex
ENSMUSP00000062888	128	MQMTEGEVFSILSSIPAAPFKAQPR	1	25	PRD000127|9811|cerebral cortex
ENSMUSP00000062888	128	TPEVSQSILMSSFGNQDTRR	31	50	PRD000319|16811|; PRD000659|22100|
ENSMUSP00000062888	128	RTIVSSSFEMSHQGSGR	50	66	PRD000659|22131|
ENSMUSP00000062888	128	TIVSSSFEMSHQGSGR	51	66	PRD000659|22106|
ENSMUSP00000062888	128	SCGLSVLRCESQEHR	78	92	PRD000659|22067|
ENSMUSP00000062888	128	WLTPHRVPTQPNHRGPAPHSLR	96	117	PRD000659|22090|
ENSMUSP00000062888	128	GPAPHSLRAFVGSWLLAGA	110	128	PRD000127|9816|cerebral cortex
ENSMUSP00000063224	115	EEREKVEGWNSGR	13	25	PRD000659|22089|
ENSMUSP00000063224	115	EKVEGWNSGR	16	25	PRD000127|9789|
ENSMUSP00000063224	115	RIQSVRVTVDVAQESTAVR	33	51	PRD000659|22066|
ENSMUSP00000063224	115	VTVDVAQESTAVR	39	51	PRD000659|22070|
ENSMUSP00000063224	115	DQHQVKRQTSVKGLHLAR	52	69	PRD000659|22101|
ENSMUSP00000063224	115	RQTSVKGLHLAR	58	69	PRD000659|22096|; PRD000659|22097|
ENSMUSP00000063224	115	GLHLAR	64	69	PRD000659|22107|
ENSMUSP00000063224	115	ISHRSELWGPK	76	86	PRD000659|22119|
ENSMUSP00000063224	115	SELWGPKGLSGK	80	91	PRD000659|22064|; PRD000659|22081|
ENSMUSP00000063224	115	SELWGPKGLSGKLICK	80	95	PRD000659|22073|
ENSMUSP00000063224	115	GLSGKLICK	87	95	PRD000319|16749|
ENSMUSP00000063224	115	NDCYLQPISPK	104	114	PRD000659|22117|
ENSMUSP00000063883	174	MSSICLFR	1	8	PRD000659|22113|
ENSMUSP00000063883	174	DVAIIKSGK	9	17	PRD000659|22092|
ENSMUSP00000063883	174	DVAIIKSGKR	9	18	PRD000419|17117|
ENSMUSP00000063883	174	DVAIIKSGKRR	9	19	PRD000659|22124|; PRD000659|22127|
ENSMUSP00000063892	144	MSFLATQFKASQEVQEILSK	1	20	PRD000127|9813|cerebral cortex
ENSMUSP00000063892	144	TKQNHHHQQQQNKQTNK	41	57	PRD000419|17117|
ENSMUSP00000063892	144	QTNKQTTQAVQYQTLPAEVR	54	73	PRD000127|9790|; PRD000127|9807|cerebral cortex
ENSMUSP00000063892	144	QTTQAVQYQTLPAEVRR	58	74	PRD000127|9806|cerebral cortex
ENSMUSP00000063892	144	RSPLKLR	74	80	PRD000319|16811|; PRD000659|22071|; PRD000659|22096|; PRD000659|22098|
ENSMUSP00000063892	144	STFFLICSILGLFFLFLCLALYCVLFTLFVKHK	81	113	PRD000127|9794|
ENSMUSP00000065182	161	SLSRSLAQVHGASGVVVR	20	37	PRD000659|22096|
ENSMUSP00000065182	161	SLAQVHGASGVVVR	24	37	PRD000127|9819|cerebral cortex
ENSMUSP00000065182	161	SYVPMKTSR	38	46	PRD000659|22108|
ENSMUSP00000065182	161	LPPCWATLLPLALMSPKER	47	65	PRD000319|16749|
ENSMUSP00000065182	161	ERSDSVLPFCDVSGGGR	64	80	PRD000127|9799|cerebral cortex; PRD000659|22085|
ENSMUSP00000065182	161	NSLTSQARSLGPR	83	95	PRD000659|22075|; PRD000659|22085|
ENSMUSP00000065182	161	NSLTSQARSLGPRGLR	83	98	PRD000659|22061|
ENSMUSP00000065182	161	YLGHSGSEK	119	127	PRD000659|22078|; PRD000659|22087|; PRD000659|22093|; PRD000659|22095|; PRD000659|22114|; PRD000659|22129|
ENSMUSP00000065182	161	GQRRLSPVLPAAPGLSFPK	142	160	PRD000659|22101|
ENSMUSP00000065182	161	RLSPVLPAAPGLSFPK	145	160	PRD000127|9810|cerebral cortex
ENSMUSP00000065182	161	LSPVLPAAPGLSFPK	146	160	PRD000127|9812|cerebral cortex
ENSMUSP00000065299	114	LLFAGVSVGR	56	65	PRD000419|17117|; PXD001387|40939|skin; PXD001387|40941|skin
ENSMUSP00000065299	114	MLCALACSK	105	113	PRD000659|22083|; PRD000659|22100|
ENSMUSP00000065299	114	MLCALACSKL	105	114	PRD000659|22084|
ENSMUSP00000065375	134	MWCVTGTVPRR	1	11	PRD000659|22100|
ENSMUSP00000065375	134	QCYCHHTLIEEAPLR	12	26	PRD000659|22077|; PRD000659|22081|; PRD000659|22123|; PRD000659|22124|
ENSMUSP00000065375	134	YTLPSACFSAISLNGTHSYILGIWGPTPHGLTVEISLR	54	91	PRD000127|9787|
ENSMUSP00000065375	134	EQFSGSLWTLPSAGFAVVALLLGVIESTR	96	124	PRD000127|9808|cerebral cortex
ENSMUSP00000065375	134	EQFSGSLWTLPSAGFAVVALLLGVIESTRQGTR	96	128	PRD000127|9787|
ENSMUSP00000065580	118	HLSTGGWLQRR	9	19	PRD000659|22074|; PRD000659|22075|; PRD000659|22126|; PRD000659|22127|
ENSMUSP00000065580	118	TNAEEPLVSLVQESLPRNWCCLQWAVSSHIYQHLR	23	57	PRD000127|9792|; PRD000127|9793|
ENSMUSP00000065580	118	QLTIDQPDLDNSSTETLPSAEVWQIHSTVNEISHQK	58	93	PRD000127|9810|cerebral cortex
ENSMUSP00000065580	118	NLQRQNSVIISGHCPDAPCLLLDA	95	118	PRD000127|9817|cerebral cortex
ENSMUSP00000065580	118	QNSVIISGHCPDAPCLLLDA	99	118	PRD000659|22106|
ENSMUSP00000065695	137	VLVQKLCLCLEEHRHTHQKDK	10	30	PRD000659|22083|
ENSMUSP00000065695	137	LCLCLEEHR	15	23	PRD000659|22121|
ENSMUSP00000065695	137	ETHRSQFSPSTMWILR	31	46	PRD000659|22097|
ENSMUSP00000065695	137	HSFQPATQLGDNEPTDSTSWWQELEGGGTFER	57	88	PRD000127|9805|cerebral cortex
ENSMUSP00000065695	137	TLEDLDRSLLPDPPEWER	98	115	PRD000127|9804|cerebral cortex; PRD000127|9817|cerebral cortex
ENSMUSP00000065695	137	LLPPSPVAVK	116	125	PRD000127|9808|cerebral cortex; PRD000127|9816|cerebral cortex
ENSMUSP00000065695	137	SDLLLFLPCHNG	126	137	PRD000127|9803|cerebral cortex
ENSMUSP00000066378	157	GCLNLASRPFYNWK	15	28	PRD000127|9815|cerebral cortex; PRD000659|22065|; PRD000659|22115|; PRD000659|22118|
ENSMUSP00000066378	157	GCLNLASRPFYNWKANFYFSLLYVSDCEHGMR	15	46	PRD000127|9808|cerebral cortex
ENSMUSP00000066378	157	ANFYFSLLYVSDCEHGMRLANLGIFSLPANSWTGAR	29	64	PRD000127|9801|cerebral cortex
ENSMUSP00000066378	157	LANLGIFSLPANSWTGAR	47	64	PRD000127|9811|cerebral cortex
ENSMUSP00000066378	157	LINMKTLESVLHELQLLGGNPMNEQVEFR	103	131	PRD000127|9797|
ENSMUSP00000066655	149	MKDGATLASSDVASYR	1	16	PRD000659|22076|; PRD000659|22092|; PRD000659|22102|
ENSMUSP00000066655	149	AKGSRPPSKRR	17	27	PRD000659|22120|
ENSMUSP00000066655	149	GSRPPSKRRLK	19	29	PRD000659|22114|
ENSMUSP00000066655	149	CEADLLGK	46	53	PRD000659|22060|
ENSMUSP00000066655	149	CEADLLGKFPSLYQSR	46	61	PRD000127|9795|; PRD000659|22070|; PRD000659|22123|
ENSMUSP00000066655	149	KPSTQGSLWR	62	71	PRD000127|9793|
ENSMUSP00000067622	106	FIIRLTNSFTR	39	49	PRD000659|22112|
ENSMUSP00000067622	106	FIIRLTNSFTRR	39	50	PRD000319|16811|; PRD000659|22064|; PRD000659|22105|
ENSMUSP00000068009	91	MLQRMGEAWVFITFSTIYHK	1	20	PRD000127|9807|cerebral cortex
ENSMUSP00000068009	91	FIARTVPCVVLSAGYWR	59	75	PRD000127|9786|
ENSMUSP00000068009	91	TVPCVVLSAGYWRLTR	63	78	PRD000659|22061|; PRD000659|22086|
ENSMUSP00000068009	91	LTRGLGSSFLMIDNTF	76	91	PRD000659|22084|
ENSMUSP00000068009	91	GLGSSFLMIDNTF	79	91	PRD000659|22057|
ENSMUSP00000068101	183	IEPRTLFGLLWLIK	71	84	PRD000127|9804|cerebral cortex
ENSMUSP00000068101	183	TRCTFDICIHVIDK	87	100	PRD000659|22088|
ENSMUSP00000068101	183	GWSLESTRQVPVNQAGSGISR	106	126	PRD000127|9795|; PRD000127|9807|cerebral cortex
ENSMUSP00000068101	183	QVPVNQAGSGISR	114	126	PRD000127|9805|cerebral cortex; PRD000127|9812|cerebral cortex
ENSMUSP00000068101	183	QVPVNQAGSGISRITSFR	114	131	PRD000127|9806|cerebral cortex
ENSMUSP00000068101	183	QFFQLPSSQATISEDNTTLNVVHGASWVLCR	133	163	PRD000127|9790|
ENSMUSP00000068236	211	CSNHFAISLSLLYPFNPPSFPPPFTPSLPPSPSSAR	122	157	PRD000127|9811|cerebral cortex
ENSMUSP00000068236	211	NFNYILESPQTGCYCVK	158	174	PRD000659|22110|
ENSMUSP00000068236	211	QRTGTHK	175	181	PRD000659|22113|
ENSMUSP00000068236	211	TKQTCPLLCPCVYLR	196	210	PRD000659|22063|; PRD000659|22070|
ENSMUSP00000068236	211	TKQTCPLLCPCVYLRG	196	211	PRD000659|22124|; PRD000659|22129|
ENSMUSP00000068236	211	QTCPLLCPCVYLR	198	210	PRD000659|22131|
ENSMUSP00000068236	211	QTCPLLCPCVYLRG	198	211	PRD000659|22067|
ENSMUSP00000068675	146	NLVTGLFSK	5	13	PRD000127|9794|; PRD000127|9802|cerebral cortex
ENSMUSP00000068675	146	LNLLSAPLQAMCIIGYMYCNK	98	118	PRD000659|22061|; PRD000659|22075|
ENSMUSP00000068675	146	KIYSDTCHFK	119	128	PRD000419|17117|
ENSMUSP00000068675	146	IYSDTCHFKK	120	129	PRD000659|22089|
ENSMUSP00000068675	146	KQVQGK	129	134	PRD000659|22057|; PRD000659|22067|; PRD000659|22122|
ENSMUSP00000068924	122	MTTTNPSTNILQNSVANKNPK	1	21	PRD000127|9812|cerebral cortex
ENSMUSP00000068924	122	KYRKPMTQTLYWQQMVTPMNR	23	43	PRD000659|22086|
ENSMUSP00000068924	122	KPMTQTLYWQQMVTPMNR	26	43	PRD000127|9791|; PRD000127|9792|; PRD000400|16716|
ENSMUSP00000068924	122	GLTVNRHRK	44	52	PRD000419|17116|
ENSMUSP00000068924	122	IILKAAFDFQER	70	81	PRD000659|22125|
ENSMUSP00000068924	122	KTLEESEVKLMSENGIPGRGK	82	102	PRD000659|22075|
ENSMUSP00000068924	122	LMSENGIPGRGK	91	102	PRD000659|22123|
ENSMUSP00000069426	112	NSTYCHPMSSLK	101	112	PRD000659|22079|
ENSMUSP00000069776	222	EQLFEDSPLETLQAWERLQGISWNISPGR	35	63	PRD000127|9805|cerebral cortex
ENSMUSP00000069776	222	LQGISWNISPGRGK	52	65	PRD000127|9803|cerebral cortex
ENSMUSP00000069776	222	SPGRGK	60	65	PRD000127|9814|cerebral cortex
ENSMUSP00000069776	222	GKSLCK	64	69	PRD000659|22094|; PRD000659|22095|
ENSMUSP00000069776	222	GKSLCKGRK	64	72	PRD000659|22066|
ENSMUSP00000069776	222	DVKAPGTQGPTSASLPSTVR	128	147	PRD000127|9814|cerebral cortex
ENSMUSP00000069776	222	APGTQGPTSASLPSTVR	131	147	PRD000127|9811|cerebral cortex; PRD000659|22119|
ENSMUSP00000069776	222	LLTHPQTEEALGPSSVPSLFWIHVPSKTHQEVLPGR	184	219	PRD000127|9802|cerebral cortex; PRD000127|9809|cerebral cortex
ENSMUSP00000069906	138	SIPNNIMGWTR	79	89	PRD000127|9811|cerebral cortex; PRD000659|22093|
ENSMUSP00000069906	138	LLSSSSSPLHPKIPR	109	123	PRD000127|9805|cerebral cortex; PRD000659|22121|
ENSMUSP00000069906	138	FHDPRVHHIVK	127	137	PRD000659|22126|
ENSMUSP00000069912	167	MGKHCTQKQWR	1	11	PRD000659|22120|
ENSMUSP00000069912	167	QWRNISDVDNK	9	19	PRD000127|9787|; PRD000127|9788|; PRD000127|9789|; PRD000400|16792|
ENSMUSP00000069912	167	RSEQRTPLVR	20	29	PRD000659|22107|
ENSMUSP00000069912	167	FSGSFLGR	76	83	PRD000491|18175|
ENSMUSP00000069912	167	SPNTDSTRHTAVPSQGK	84	100	PRD000127|9796|
ENSMUSP00000069912	167	SPNTDSTRHTAVPSQGKVPGK	84	104	PRD000659|22088|
ENSMUSP00000069912	167	HTAVPSQGK	92	100	PRD000659|22084|
ENSMUSP00000069912	167	MSVGIK	105	110	PRD000659|22072|
ENSMUSP00000069912	167	QDGAPEPFLFHLGK	141	154	PRD000659|22092|
ENSMUSP00000069912	167	QDGAPEPFLFHLGKCK	141	156	PRD000127|9814|cerebral cortex; PRD000319|16749|
ENSMUSP00000070493	116	PPSFLPCSMYAPPL	98	111	PRD000400|16686|
ENSMUSP00000070801	133	MCVICAIAIPIQRLR	1	15	PRD000319|16811|
ENSMUSP00000070801	133	NFHPESCFMCGFSR	16	29	PRD000127|9813|cerebral cortex; PRD000659|22070|; PRD000659|22071|; PRD000659|22117|; PRD000659|22122|
ENSMUSP00000070801	133	ISLHSKTGYDLCLLFLLYPLALPPPPPNK	30	58	PRD000127|9796|
ENSMUSP00000070801	133	HAVHKCHHQGRIYRGVHK	59	76	PRD000659|22066|
ENSMUSP00000070801	133	TVLRIYVTRHPSQR	77	90	PRD000659|22073|
ENSMUSP00000070801	133	HPSQRAFLMFLISLR	86	100	PRD000400|16785|
ENSMUSP00000070801	133	QALIMLFSLEHTLPAPRVYSFMESEAQLTLGFY	101	133	PRD000127|9791|; PRD000127|9792|
ENSMUSP00000071022	102	EDSKERERGLPKAMFGQAGTK	75	95	PRD000400|16817|
ENSMUSP00000071022	102	ERGLPKAMFGQAGTKR	81	96	PRD000659|22074|; PRD000659|22112|
ENSMUSP00000071022	102	AMFGQAGTK	87	95	PRD000659|22117|
ENSMUSP00000071080	131	RSSLIRPMTQTSFSSKTLLK	54	73	PRD000055|3534|erythroid lineage cell
ENSMUSP00000071080	131	TLAPAGFPNQLLACR	74	88	PRD000127|9818|cerebral cortex; PRD000400|16757|; PRD000659|22084|; PRD000659|22117|
ENSMUSP00000071235	95	AGFGIDTCVIPSFSMGMLVVFMASMLPTEPPPSPWVAH	58	95	PRD000127|9797|
ENSMUSP00000071453	126	MAAALQKAK	1	9	PRD000659|22065|; PRD000659|22069|; PRD000659|22070|; PRD000659|22117|; PRD000659|22120|; PRD000659|22130|
ENSMUSP00000071453	126	SVTLNLSGQTAPYNFPENNHQVEQACILK	98	126	PRD000127|9787|
ENSMUSP00000072263	109	LMGVFHIQTTVVR	8	20	PRD000400|16813|; PRD000659|22097|
ENSMUSP00000072263	109	DEGRDAHTCMCTWVCRCTDCIR	69	90	PRD000400|16746|
ENSMUSP00000072263	109	DAHTCMCTWVCRCTDCIRIDLLVLK	73	97	PRD000659|22092|; PRD000659|22120|
ENSMUSP00000072263	109	CTDCIRIDLLVLK	85	97	PRD000659|22094|
ENSMUSP00000072263	109	SREKPICPLPQK	98	109	PRD000127|9805|cerebral cortex; PRD000127|9810|cerebral cortex; PRD000659|22128|
ENSMUSP00000072830	102	KPWKENAALPR	45	55	PRD000659|22081|
ENSMUSP00000072830	102	ENAALPRLSIR	49	59	PRD000659|22099|
ENSMUSP00000072830	102	NSAAVSTGFSR	60	70	PRD000419|17117|; PRD000659|22078|
ENSMUSP00000072830	102	LLLLDAVSPGLMR	71	83	PRD000127|9813|cerebral cortex; PRD000659|22057|; PRD000659|22060|; PRD000659|22074|; PRD000659|22085|; PRD000659|22087|; PRD000659|22089|; PRD000659|22092|; PRD000659|22093|; PRD000659|22095|; PRD000659|22096|; PRD000659|22099|; PRD000659|22100|; PRD000659|22102|; PRD000659|22107|; PRD000659|22115|; PRD000659|22125|; PRD000659|22126|; PRD000659|22131|
ENSMUSP00000072830	102	LPFVCSLNLATPVVHDVCC	84	102	PRD000659|22057|; PRD000659|22071|; PRD000659|22108|
ENSMUSP00000078054	122	TGAESGGWITEFK	24	36	PRD000659|22088|
ENSMUSP00000078054	122	ILSFLLITAVLIFPYVK	96	112	PRD000659|22090|
ENSMUSP00000078183	123	LTLAAAVVWSMR	97	108	PRD000659|22058|; PRD000659|22067|; PRD000659|22103|; PRD000659|22106|; PRD000659|22120|; PRD000659|22124|; PRD000659|22129|
ENSMUSP00000078183	123	LTLAAAVVWSMRTCR	97	111	PRD000659|22123|
ENSMUSP00000081703	135	MAGYLINSALQTHISKTMPPTGL	1	23	PRD000400|16702|
ENSMUSP00000081703	135	SPELMCSNLLLGVGSSPFGK	49	68	PRD000127|9791|; PRD000127|9792|
ENSMUSP00000081703	135	SPELMCSNLLLGVGSSPFGKDFELLNSR	49	76	PRD000127|9797|
ENSMUSP00000083879	136	MEGGVIAPPGPR	1	12	PRD000127|9793|
ENSMUSP00000083879	136	MEGGVIAPPGPRR	1	13	PRD000659|22068|; PRD000659|22071|; PRD000659|22076|; PRD000659|22080|; PRD000659|22082|; PRD000659|22091|; PRD000659|22092|; PRD000659|22117|; PRD000659|22130|
ENSMUSP00000083879	136	KLQLEQLAR	15	23	PRD000010|1641|brain
ENSMUSP00000083879	136	LQLEQLAR	16	23	PRD000659|22067|
ENSMUSP00000083879	136	KSPLWERLGSSLER	95	108	PRD000659|22127|
ENSMUSP00000083879	136	SPLWERLGSSLER	96	108	PRD000127|9800|cerebral cortex
ENSMUSP00000083879	136	LGSSLERAPGFLGESK	102	117	PRD000659|22083|; PRD000659|22102|; PRD000659|22105|
ENSMUSP00000083879	136	APGFLGESKNRLFFLMANCCSR	109	130	PRD000659|22081|
ENSMUSP00000083879	136	NRLFFLMANCCSR	118	130	PRD000659|22067|; PRD000659|22120|
ENSMUSP00000083879	136	NRLFFLMANCCSRRGGGGG	118	136	PRD000659|22073|
ENSMUSP00000083879	136	LFFLMANCCSR	120	130	PRD000659|22088|; PRD000659|22101|
ENSMUSP00000083879	136	LFFLMANCCSRRGGGGG	120	136	PRD000659|22075|; PRD000659|22104|; PRD000659|22130|
ENSMUSP00000087703	70	MVLVLAILAIK	1	11	PRD000659|22077|
ENSMUSP00000088938	147	QESDIGHDWDVSSDR	5	19	PRD000127|9807|cerebral cortex; PRD000659|22128|
ENSMUSP00000088938	147	EDSCGAQAAPSVTVKPPLTR	28	47	PRD000127|9805|cerebral cortex; PRD000127|9818|cerebral cortex; PRD000419|17117|
ENSMUSP00000088938	147	GLSVLLQAMAAAATTAMR	79	96	PRD000127|9787|; PRD000127|9788|; PRD000127|9798|cerebral cortex; PRD000127|9810|cerebral cortex; PRD000659|22113|
ENSMUSP00000090049	125	MTGKDVCPCWKPPGTPELAAHSVIK	1	25	PRD000659|22061|
ENSMUSP00000090049	125	DVCPCWKPPGTPELAAHSVIK	5	25	PRD000127|9817|cerebral cortex; PRD000659|22087|
ENSMUSP00000090049	125	YLVTPSDKR	26	34	PRD000127|9793|; PRD000127|9807|cerebral cortex
ENSMUSP00000090049	125	SAESLPLLHHLR	53	64	PRD000127|9789|
ENSMUSP00000090049	125	IKARASCMLGK	111	121	PRD000319|16810|; PRD000659|22128|
ENSMUSP00000090049	125	IKARASCMLGKYLTN	111	125	PRD000659|22074|
ENSMUSP00000090049	125	ARASCMLGKYLTN	113	125	PRD000659|22082|
ENSMUSP00000090351	108	MRQQGPIALNLFK	1	13	PRD000319|16811|
ENSMUSP00000090351	108	MRQQGPIALNLFKIPK	1	16	PRD000055|3534|erythroid lineage cell
ENSMUSP00000090351	108	SCAILVYVGKLSFHLR	25	40	PRD000127|9807|cerebral cortex
ENSMUSP00000090351	108	QYNFSLIRSPVLGTEPAEPAWYALHNCSATEVHLPNLTLTSNK	41	83	PRD000127|9807|cerebral cortex
ENSMUSP00000090351	108	SPVLGTEPAEPAWYALHNCSATEVHLPNLTLTSNK	49	83	PRD000127|9817|cerebral cortex
ENSMUSP00000090351	108	SMCYQRR	84	90	PRD000659|22121|
ENSMUSP00000090351	108	TWEQINKWMSNK	92	103	PRD000400|16722|; PRD000400|16723|
ENSMUSP00000090351	108	WMSNKQVEPL	99	108	PRD000659|22079|; PRD000659|22094|
ENSMUSP00000091206	117	GRWKQFIALR	5	14	PRD000659|22065|
ENSMUSP00000091206	117	TLLVLDYGLPR	44	54	PRD000127|9814|cerebral cortex
ENSMUSP00000091206	117	CCFTCALYIKPYLQAIGTGSQEK	55	77	PRD000127|9811|cerebral cortex
ENSMUSP00000091206	117	SDTIGKCGPVGVEEVYHCGCGV	96	117	PRD000127|9792|; PRD000127|9793|
ENSMUSP00000091246	166	QDQACAALCR	106	115	PRD000127|9814|cerebral cortex; PRD000659|22081|
ENSMUSP00000091246	166	FTLILVLEAIPGAAESK	137	153	PRD000127|9788|
ENSMUSP00000091873	114	LLKGIHFMSR	40	49	PRD000659|22060|; PRD000659|22064|; PRD000659|22065|; PRD000659|22078|; PRD000659|22083|; PRD000659|22088|; PRD000659|22092|; PRD000659|22099|; PRD000659|22101|; PRD000659|22110|
ENSMUSP00000091873	114	LLKGIHFMSRK	40	50	PRD000659|22061|
ENSMUSP00000091873	114	KSLSSQPADSR	50	60	PRD000659|22123|
ENSMUSP00000091873	114	SLSSQPADSRLWEFR	51	65	PRD000659|22073|
ENSMUSP00000091873	114	SLSSQPADSRLWEFRK	51	66	PRD000659|22066|
ENSMUSP00000091873	114	KSWVFPPCR	66	74	PRD000659|22078|; PRD000659|22108|
ENSMUSP00000091873	114	EIVVCPTVPLNVQCPLLPSTPSPLGK	75	100	PRD000127|9797|
ENSMUSP00000091873	114	NVQCPLLPSTPSPL	85	98	PRD000400|16685|
ENSMUSP00000091873	114	LTAKVYVS	107	114	PRD000659|22061|; PRD000659|22113|; PRD000659|22119|; PRD000659|22120|; PRD000659|22121|; PRD000659|22122|; PRD000659|22129|
ENSMUSP00000093111	113	EAETQGVLQACLVSTGYVTDFFFLMR	15	40	PRD000659|22061|
ENSMUSP00000093111	113	GRFLGKDR	88	95	PRD000659|22120|
ENSMUSP00000093111	113	DRVLNDRGEASPIR	94	107	PRD000419|17117|
ENSMUSP00000094206	155	QISAGFRVSPK	9	19	PRD000659|22091|; PRD000659|22112|
ENSMUSP00000094206	155	GGRHRLR	55	61	PRD000659|22106|; PRD000659|22107|
ENSMUSP00000094206	155	ERKKCTLGK	71	79	PRD000659|22073|; PRD000659|22091|
ENSMUSP00000094206	155	KCTLGK	74	79	PRD000659|22077|
ENSMUSP00000094206	155	CTLGKGASTFCACAFMEVTSSRLLK	75	99	PRD000319|16749|
ENSMUSP00000094206	155	LLKMLLRSAPSQAVAIR	97	113	PRD000659|22083|
ENSMUSP00000094206	155	LLKMLLRSAPSQAVAIRAK	97	115	PRD000319|16810|
ENSMUSP00000094206	155	MLLRSAPSQAVAIR	100	113	PRD000127|9795|; PRD000127|9796|; PRD000659|22089|
ENSMUSP00000094206	155	MLLRSAPSQAVAIRAK	100	115	PRD000659|22079|; PRD000659|22101|
ENSMUSP00000094206	155	RALWVAPRHTIATTVRR	122	138	PRD000659|22074|; PRD000659|22097|; PRD000659|22109|; PRD000659|22113|; PRD000659|22118|; PRD000659|22131|
ENSMUSP00000094206	155	ALWVAPRHTIATTVR	123	137	PRD000127|9791|; PRD000127|9792|; PRD000659|22106|
ENSMUSP00000095548	125	EMEERQSKNR	2	11	PRD000055|3534|erythroid lineage cell
ENSMUSP00000095548	125	QSKNRGLPGMVCGLSK	7	22	PRD000659|22070|; PRD000659|22129|
ENSMUSP00000095548	125	NRGLPGMVCGLSK	10	22	PRD000659|22084|; PRD000659|22129|
ENSMUSP00000095548	125	NNMGGVNCR	39	47	PRD000659|22081|; PRD000659|22093|; PRD000659|22104|
ENSMUSP00000095548	125	NNMGGVNCRR	39	48	PRD000127|9800|cerebral cortex; PRD000659|22104|; PRD000659|22107|
ENSMUSP00000095548	125	TCSICTSEPSMSQSQAGCSASSLYSRSGCPLSCLDVGDMR	49	88	PRD000127|9789|
ENSMUSP00000095548	125	SGCPLSCLDVGDMRK	75	89	PRD000659|22076|
ENSMUSP00000095548	125	QALESLLRQR	90	99	PRD000659|22096|; PRD000659|22110|
ENSMUSP00000095548	125	QRSPDQHAVPVAFR	98	111	PRD000319|16810|
ENSMUSP00000095548	125	SPDQHAVPVAFRSR	100	113	PRD000127|9787|; PRD000127|9788|; PRD000127|9791|; PRD000127|9792|; PRD000127|9800|cerebral cortex; PRD000127|9815|cerebral cortex; PRD000127|9816|cerebral cortex
ENSMUSP00000095577|ENSMUSP00000130110	169	MKCPIMVSGTGQK	69	81	PRD000127|9800|cerebral cortex; PRD000659|22074|; PRD000659|22086|; PRD000659|22098|; PRD000659|22099|; PRD000659|22105|; PRD000659|22107|; PRD000659|22108|; PRD000659|22123|
ENSMUSP00000095577|ENSMUSP00000130110	169	MKCPIMVSGTGQKNECAPIALNSTLQR	69	95	PRD000659|22084|
ENSMUSP00000095577|ENSMUSP00000130110	169	CPIMVSGTGQK	71	81	PRD000659|22083|; PRD000659|22097|
ENSMUSP00000095577|ENSMUSP00000130110	169	CPIMVSGTGQKNECAPIALNSTLQR	71	95	PRD000127|9813|cerebral cortex; PRD000659|22082|; PRD000659|22100|
ENSMUSP00000095577|ENSMUSP00000130110	169	NECAPIALNSTLQR	82	95	PRD000127|9816|cerebral cortex; PRD000659|22100|
ENSMUSP00000095577|ENSMUSP00000130110	169	NECAPIALNSTLQRGVR	82	98	PRD000127|9806|cerebral cortex
ENSMUSP00000095577|ENSMUSP00000130110	169	GVRQGKELSVLSTLGPDHR	96	114	PRD000400|16736|
ENSMUSP00000095577|ENSMUSP00000130110	169	QGKELSVLSTLGPDHRK	99	115	PRD000659|22102|
ENSMUSP00000095577|ENSMUSP00000130110	169	ELSVLSTLGPDHR	102	114	PRD000127|9800|cerebral cortex; PRD000127|9808|cerebral cortex; PRD000659|22087|
ENSMUSP00000095577|ENSMUSP00000130110	169	ELSVLSTLGPDHRK	102	115	PRD000127|9787|; PRD000127|9791|; PRD000127|9792|; PRD000127|9807|cerebral cortex; PRD000127|9819|cerebral cortex
ENSMUSP00000095577|ENSMUSP00000130110	169	DLLPGRGLFLPGLRR	155	169	PRD000400|16816|; PRD000659|22091|; PRD000659|22093|
ENSMUSP00000095596	104	ILQLPLKIFMAILCR	8	22	PRD000659|22091|; PRD000659|22096|; PRD000659|22116|; PRD000659|22123|
ENSMUSP00000095596	104	RMNCDTQASVSGAQGGCDLMR	35	55	PRD000659|22108|
ENSMUSP00000095596	104	MNCDTQASVSGAQGGCDLMR	36	55	PRD000127|9790|; PRD000127|9816|cerebral cortex
ENSMUSP00000095596	104	CCWMPASHPVSCSIQKIK	56	73	PRD000400|16776|
ENSMUSP00000095596	104	GCLFPINVVCDCRTSSPTEFSFPT	81	104	PRD000659|22095|
ENSMUSP00000095704	161	KTGDAFGMR	8	16	PRD000319|16749|; PRD000319|16810|; PRD000659|22058|; PRD000659|22059|; PRD000659|22065|; PRD000659|22066|; PRD000659|22067|; PRD000659|22068|; PRD000659|22069|; PRD000659|22070|; PRD000659|22071|; PRD000659|22072|; PRD000659|22076|; PRD000659|22077|; PRD000659|22078|; PRD000659|22084|; PRD000659|22086|; PRD000659|22087|; PRD000659|22089|; PRD000659|22095|; PRD000659|22096|; PRD000659|22099|; PRD…
ENSMUSP00000095704	161	FPGHSTSWCLYCEWR	36	50	PRD000659|22107|; PRD000659|22114|; PRD000659|22115|; PRD000659|22120|; PRD000659|22123|
ENSMUSP00000095704	161	SMAVFLKLWAALPTLRDVACRK	51	72	PRD000400|16805|
ENSMUSP00000095704	161	DVACRK	67	72	PRD000659|22058|; PRD000659|22087|; PRD000659|22111|
ENSMUSP00000096191	111	HTSAGRGASLVPHCHFCEDLSFQITGR	60	86	PRD000659|22078|; PRD000659|22085|; PRD000659|22093|; PRD000659|22110|
ENSMUSP00000096191	111	GASLVPHCHFCEDLSFQITGR	66	86	PRD000400|16788|
ENSMUSP00000096191	111	RDLEDLVVLPIIPQLPEDPEL	91	111	PRD000127|9811|cerebral cortex; PRD000127|9813|cerebral cortex
ENSMUSP00000096212	124	HGSLSDPTK	41	49	PRD000127|9797|; PRD000127|9799|cerebral cortex
ENSMUSP00000096212	124	SQISALELILRPR	50	62	PRD000659|22102|
ENSMUSP00000096243|ENSMUSP00000143360	174	QSCHHSNYHVSSPSDKPR	84	101	PRD000127|9789|
ENSMUSP00000096243|ENSMUSP00000143360	174	NKQDRIKPPR	150	159	PRD000659|22127|; PRD000659|22130|; PRD000659|22131|
ENSMUSP00000096536	172	MRGSERRVAGGR	1	12	PRD000659|22058|
ENSMUSP00000096536	172	DTHISASSSPVLVSAEGTR	45	63	PRD000127|9814|cerebral cortex
ENSMUSP00000096536	172	VSAEGTRGMPCMGEEASTCSGREESGKSL	57	85	PRD000400|16686|
ENSMUSP00000096536	172	GMPCMGEEASTCSGR	64	78	PRD000659|22118|; PRD000659|22120|; PRD000659|22131|
ENSMUSP00000096536	172	EESGKSLASTPQQLLSGPPR	79	98	PRD000127|9787|; PRD000400|16796|
ENSMUSP00000096536	172	ALPARQIWTDCR	105	116	PRD000659|22115|; PRD000659|22122|
ENSMUSP00000096536	172	LSGTFRPSASSLCSSSLR	117	134	PRD000659|22071|
ENSMUSP00000096872	133	MMPLHQPLLRMGLSSAR	53	69	PRD000659|22099|
ENSMUSP00000096872	133	TRPCPVDLLPALCLTFWP	116	133	PRD000659|22071|
ENSMUSP00000097022	127	ADAPTPEGSTGLVWLSRTCVR	7	27	PRD000659|22092|
ENSMUSP00000097022	127	SGAKHWTR	58	65	PRD000659|22083|; PRD000659|22088|; PRD000659|22105|; PRD000659|22107|
ENSMUSP00000097022	127	RPCHCNLHALNPSVHSSGMTSPLPQPSTHPLQPSSSLDEK	66	105	PRD000127|9792|; PRD000127|9793|
ENSMUSP00000097022	127	AASLNLWQGDDQECMR	106	121	PRD000419|17116|
ENSMUSP00000097053	129	MLFVSKSDSEMKCEWVTR	108	125	PRD000659|22075|
ENSMUSP00000097134	115	LTSALFVEIQAAYRALPLETT	95	115	PRD000659|22098|
ENSMUSP00000097253	128	KMILNGWDK	24	32	PRD000400|16804|
ENSMUSP00000097253	128	TGDLSVLRAICSR	71	83	PRD000659|22100|
ENSMUSP00000097253	128	ELLTLGVGAYPDLVCPTGISISTLLR	84	109	PRD000127|9806|cerebral cortex
ENSMUSP00000097253	128	CMGPVMVGLR	110	119	PRD000319|16810|; PRD000659|22091|; PRD000659|22111|; PRD000659|22121|; PRD000659|22125|; PRD000659|22128|
ENSMUSP00000097283	135	MPPHAK	1	6	PRD000659|22086|
ENSMUSP00000097283	135	MPPHAKGQQACQRSWR	1	16	PRD000659|22123|
ENSMUSP00000097283	135	GQQACQRSWR	7	16	PRD000659|22060|
ENSMUSP00000097283	135	GDPVCTDAYGYHWHLGLPR	17	35	PRD000659|22116|
ENSMUSP00000097283	135	GDPVCTDAYGYHWHLGLPRSSWANR	17	41	PRD000127|9809|cerebral cortex
ENSMUSP00000097283	135	SSWANRVWVAAAVCPVHEFK	36	55	PRD000127|9818|cerebral cortex
ENSMUSP00000097473	69	VETLNAGRGYEQCCHHFNCGLGQIFVLSK	8	36	PRD000127|9795|
ENSMUSP00000097473	69	GYEQCCHHFNCGLGQIFVLSK	16	36	PRD000127|9816|cerebral cortex
ENSMUSP00000097473	69	DLFTRGVNR	37	45	PRD000127|9802|cerebral cortex; PRD000127|9804|cerebral cortex; PRD000127|9805|cerebral cortex; PRD000127|9809|cerebral cortex; PRD000127|9819|cerebral cortex
ENSMUSP00000097473	69	GVNRENPVAGLR	42	53	PRD000127|9812|cerebral cortex; PRD000659|22067|
ENSMUSP00000097473	69	ENPVAGLR	46	53	PRD000659|22084|
ENSMUSP00000097765	195	MAFIPITLGMSR	1	12	PRD000659|22083|
ENSMUSP00000097765	195	NEQKMLRYAGLR	93	104	PRD000659|22087|; PRD000659|22124|
ENSMUSP00000097867	145	ARLARGHLNCPLTGGIR	6	22	PRD000659|22073|
ENSMUSP00000097867	145	LARGHLNCPLTGGIR	8	22	PRD000659|22073|; PRD000659|22088|
ENSMUSP00000097867	145	GHLNCPLTGGIR	11	22	PRD000659|22119|
ENSMUSP00000097867	145	GHLNCPLTGGIREPK	11	25	PRD000659|22092|
ENSMUSP00000097867	145	EPKGSGSAHLSR	23	34	PRD000127|9818|cerebral cortex
ENSMUSP00000097867	145	EPKGSGSAHLSRAAQRGR	23	40	PRD000659|22073|; PRD000659|22087|; PRD000659|22090|; PRD000659|22102|; PRD000659|22104|; PRD000659|22107|; PRD000659|22110|; PRD000659|22117|; PRD000659|22123|; PRD000659|22124|; PRD000659|22125|; PRD000659|22129|; PRD000659|22131|
ENSMUSP00000097867	145	GSGSAHLSRAAQR	26	38	PRD000127|9786|
ENSMUSP00000097867	145	LEVGGAGARLPAAR	49	62	PRD000127|9792|; PRD000127|9793|
ENSMUSP00000097867	145	LPAARGVQPSLPAPPGGLRAPSSPYR	58	83	PRD000400|16795|; PRD000419|17117|
ENSMUSP00000097867	145	GVQPSLPAPPGGLR	63	76	PRD000127|9786|; PRD000127|9788|; PRD000127|9801|cerebral cortex; PRD000127|9819|cerebral cortex; PRD000659|22106|
ENSMUSP00000097867	145	ASQLPDPRDR	84	93	PRD000127|9791|; PRD000127|9792|
ENSMUSP00000097867	145	LGRPTQGPRLGR	110	121	PRD000659|22127|
ENSMUSP00000097867	145	WRLVEGWSDSLR	133	144	PRD000659|22091|; PRD000659|22105|
ENSMUSP00000097941	123	METAESLALIEQPTKPIAEK	40	59	PRD000127|9809|cerebral cortex
ENSMUSP00000097941	123	NMWSMK	60	65	PRD000659|22066|
ENSMUSP00000097941	123	ILLPRRSSGILR	77	88	PRD000659|22085|
ENSMUSP00000097941	123	SSGILR	83	88	PXD000558|37122|cell culture
ENSMUSP00000097941	123	HPMLCLPLCDQVLK	89	102	PRD000127|9817|cerebral cortex
ENSMUSP00000097941	123	HPMLCLPLCDQVLKLWLR	89	106	PRD000127|9808|cerebral cortex
ENSMUSP00000098020	175	KPATEGLRYSPGGMHTPAR	23	41	PRD000127|9796|; PRD000127|9800|cerebral cortex
ENSMUSP00000098020	175	RCSPAWGDCAEPMASLTASAR	49	69	PRD000319|16810|; PRD000400|16757|
ENSMUSP00000098020	175	LHRGFPRPAHQARPPPCSGCCGR	70	92	PRD000419|17117|
ENSMUSP00000098020	175	GFPRPAHQARPPPCSGCCGRR	73	93	PRD000127|9811|cerebral cortex
ENSMUSP00000098020	175	RLPAGGTRTASGK	93	105	PRD000659|22063|; PRD000659|22070|; PRD000659|22075|; PRD000659|22080|; PRD000659|22082|; PRD000659|22089|; PRD000659|22090|; PRD000659|22093|; PRD000659|22100|; PRD000659|22102|; PRD000659|22104|; PRD000659|22110|; PRD000659|22117|; PRD000659|22118|; PRD000659|22121|
ENSMUSP00000098020	175	RLPAGGTRTASGKVLGYR	93	110	PRD000659|22085|; PRD000659|22097|; PRD000659|22099|; PRD000659|22101|; PRD000659|22106|; PRD000659|22109|; PRD000659|22117|; PRD000659|22120|; PRD000659|22123|; PRD000659|22126|; PRD000659|22127|; PRD000659|22128|; PRD000659|22129|
ENSMUSP00000098020	175	TASGKVLGYR	101	110	PRD000659|22064|; PRD000659|22065|; PRD000659|22068|; PRD000659|22069|; PRD000659|22070|; PRD000659|22071|; PRD000659|22072|; PRD000659|22103|; PRD000659|22107|; PRD000659|22108|; PRD000659|22109|; PRD000659|22111|; PRD000659|22112|; PRD000659|22113|; PRD000659|22115|; PRD000659|22117|; PRD000659|22119|; PRD000659|22123|; PRD000659|22129|
ENSMUSP00000098020	175	RDGGQRLWGKR	132	142	PRD000659|22109|
ENSMUSP00000098020	175	LWGKRARSSALAALLASTPR	138	157	PRD000659|22059|
ENSMUSP00000098020	175	ARSSALAALLASTPR	143	157	PRD000127|9789|; PRD000127|9791|; PRD000127|9792|; PRD000659|22065|; PRD000659|22085|; PRD000659|22104|; PRD000659|22105|; PRD000659|22108|
ENSMUSP00000098020	175	SSALAALLASTPRLSPLCSCGACR	145	168	PRD000127|9788|; PRD000127|9791|; PRD000127|9792|; PRD000127|9793|
ENSMUSP00000098020	175	LSPLCSCGACR	158	168	PRD000319|16811|; PRD000419|17116|; PRD000659|22058|; PRD000659|22074|; PRD000659|22076|; PRD000659|22077|; PRD000659|22078|; PRD000659|22080|; PRD000659|22085|; PRD000659|22098|; PRD000659|22106|; PRD000659|22121|; PRD000659|22127|
ENSMUSP00000098020	175	LSPLCSCGACRSKEEKLL	158	175	PRD000659|22057|
ENSMUSP00000098279	92	FPKDAIFIAGVHLKPHTADGTVAQTCIPVTR	6	36	PRD000127|9797|; PRD000127|9801|cerebral cortex
ENSMUSP00000098279	92	LNVKLQNPFCYR	61	72	PRD000127|9810|cerebral cortex
ENSMUSP00000098839	101	MLTTEPSLGR	1	10	PRD000659|22086|; PRD000659|22093|; PRD000659|22097|; PRD000659|22112|
ENSMUSP00000098839	101	MLTTEPSLGRR	1	11	PRD000127|9801|cerebral cortex
ENSMUSP00000098839	101	DFVLLLPEPGVKLCLCR	81	97	PRD000127|9787|; PRD000127|9818|cerebral cortex
ENSMUSP00000098968	126	VEIPGHLDSAESLQAPRLSPAPQLEK	10	35	PRD000127|9787|
ENSMUSP00000098968	126	LSPAPQLEKGPAPPPPTPAHPR	27	48	PRD000127|9793|
ENSMUSP00000098968	126	RKLRGPLLAVAASPR	52	66	PRD000659|22062|
ENSMUSP00000098968	126	RKLRGPLLAVAASPRYR	52	68	PRD000659|22121|
ENSMUSP00000098968	126	KLRGPLLAVAASPR	53	66	PRD000659|22068|; PRD000659|22093|
ENSMUSP00000098968	126	KLRGPLLAVAASPRYRR	53	69	PRD000659|22128|
ENSMUSP00000098968	126	GPLLAVAASPRYR	56	68	PRD000659|22066|; PRD000659|22090|; PRD000659|22091|
ENSMUSP00000098968	126	FCVFPTGGAILMHLLTVCVGVFCLHK	73	98	PRD000127|9794|
ENSMUSP00000098968	126	RITQAALYVAR	115	125	PRD000659|22059|; PRD000659|22076|
ENSMUSP00000098968	126	ITQAALYVARA	116	126	PRD000659|22061|; PRD000659|22072|; PRD000659|22073|; PRD000659|22081|; PRD000659|22088|; PRD000659|22093|; PRD000659|22117|; PRD000659|22122|; PRD000659|22130|; PRD000659|22131|
ENSMUSP00000099917	104	GCTLRSWGVAR	35	45	PRD000659|22059|; PRD000659|22072|; PRD000659|22086|; PRD000659|22089|; PRD000659|22098|; PRD000659|22102|; PRD000659|22113|; PRD000659|22115|
ENSMUSP00000099917	104	QSCACLHGFQEHLLGDLAHHIVSLR	62	86	PRD000127|9810|cerebral cortex
ENSMUSP00000100515	115	MCHCQFSYLFKYRENMPRTQNR	1	22	PRD000659|22079|
ENSMUSP00000100515	115	YRENMPRTQNR	12	22	PRD000659|22127|
ENSMUSP00000100515	115	WYGDGYGGGGSNNGEVEK	52	69	PRD000659|22099|
ENSMUSP00000100571	103	MNLFMLQKQYCMSHK	1	15	PRD000400|16816|; PRD000400|16817|; PRD000659|22085|; PRD000659|22108|
ENSMUSP00000100571	103	NLFMLQK	2	8	PRD000045|3266|
ENSMUSP00000100571	103	GNRKHFFIFVR	16	26	PRD000659|22094|; PRD000659|22130|
ENSMUSP00000100571	103	VRKGRQNPGHITPSFRCY	25	42	PRD000400|16709|
ENSMUSP00000100571	103	CYVGGFISK	41	49	PRD000127|9786|
ENSMUSP00000100571	103	CYVGGFISKSSSK	41	53	PRD000127|9819|cerebral cortex; PRD000419|17116|
ENSMUSP00000100571	103	CYVGGFISKSSSKR	41	54	PRD000659|22110|
ENSMUSP00000100571	103	HVKGKWCHGGCHGNRCR	80	96	PRD000659|22087|; PRD000659|22095|; PRD000659|22121|
ENSMUSP00000100571	103	GKWCHGGCHGNRCRGSAVVYR	83	103	PRD000319|16810|
ENSMUSP00000100571	103	WCHGGCHGNRCR	85	96	PRD000659|22100|
ENSMUSP00000100571	103	CRGSAVVYR	95	103	PRD000127|9815|cerebral cortex
ENSMUSP00000101048	48	MWAELAAGLVLQDRAR	1	16	PRD000127|9813|cerebral cortex; PRD000400|16798|
ENSMUSP00000101048	48	VLSVPCR	33	39	PRD000659|22066|
ENSMUSP00000101048	48	VLSVPCRALALEQR	33	46	PRD000659|22070|
ENSMUSP00000101431	143	FHLLQAIKPPEKQMEQK	4	20	PRD000055|3534|erythroid lineage cell
ENSMUSP00000101431	143	QMEQKSSALGSIMK	16	29	PRD000659|22094|
ENSMUSP00000101431	143	EGRPDCRPANMIYGFDK	63	79	PRD000659|22084|
ENSMUSP00000101431	143	EGRPDCRPANMIYGFDKTHPR	63	83	PRD000419|17117|
ENSMUSP00000101431	143	CCTDLLFQPR	85	94	PRD000659|22116|
ENSMUSP00000101431	143	CCTDLLFQPRLLMLSR	85	100	PRD000659|22097|
ENSMUSP00000102321	185	MSQTTPKKKK	1	10	PRD000659|22099|; PRD000659|22130|
ENSMUSP00000102321	185	DCPHLTPGSSR	35	45	PRD000659|22092|
ENSMUSP00000102321	185	RWVNFSQDQDGR	46	57	PRD000659|22083|
ENSMUSP00000102321	185	DTEDTANR	68	75	PRD000659|22059|; PRD000659|22072|; PRD000659|22094|
ENSMUSP00000102321	185	RPREKHMADCPSSR	79	92	PRD000419|17116|; PRD000659|22058|
ENSMUSP00000102321	185	EKHMADCPSSRR	82	93	PRD000659|22066|
ENSMUSP00000102321	185	HMADCPSSRRDPAQGGR	84	100	PRD000659|22077|
ENSMUSP00000102695|ENSMUSP00000102696	55	SGASNSYLHGTCR	15	27	PRD000659|22101|
ENSMUSP00000102695|ENSMUSP00000102696	55	SGASNSYLHGTCRQEGLFVSKK	15	36	PRD000659|22071|
ENSMUSP00000102695|ENSMUSP00000102696	55	QEGLFVSKKICTGCTQIER	28	46	PRD000659|22072|
ENSMUSP00000102695|ENSMUSP00000102696	55	KICTGCTQIER	36	46	PRD000659|22090|
ENSMUSP00000102695|ENSMUSP00000102696	55	ICTGCTQIER	37	46	PRD000659|22100|
ENSMUSP00000102695|ENSMUSP00000102696	55	HFDMKDFSP	47	55	PRD000127|9818|cerebral cortex
ENSMUSP00000104751	133	SHPVAITCSALNHVPDFFR	16	34	PRD000127|9798|cerebral cortex; PRD000127|9813|cerebral cortex; PRD000659|22131|
ENSMUSP00000104751	133	SATVSLPSVHWMLASETR	51	68	PRD000659|22070|
ENSMUSP00000104751	133	APPPRSHVCK	104	113	PRD000127|9792|; PRD000127|9793|
ENSMUSP00000104751	133	THNLSPESPVK	114	124	PRD000055|3534|erythroid lineage cell
ENSMUSP00000107457	155	QGPQSP	58	63	PRD000319|16810|; PRD000659|22058|; PRD000659|22060|; PRD000659|22062|; PRD000659|22063|; PRD000659|22081|; PRD000659|22083|; PRD000659|22087|; PRD000659|22088|; PRD000659|22089|; PRD000659|22091|; PRD000659|22093|; PRD000659|22095|; PRD000659|22102|; PRD000659|22103|; PRD000659|22105|; PRD000659|22106|; PRD000659|22112|
ENSMUSP00000107457	155	WIWFKK	96	101	PRD000659|22123|
ENSMUSP00000107457	155	GGNESPR	119	125	PRD000659|22071|
ENSMUSP00000107457	155	GGNESPRVEISSSTGLR	119	135	PRD000659|22065|
ENSMUSP00000107457	155	VEISSSTGLRR	126	136	PRD000127|9801|cerebral cortex
ENSMUSP00000107457	155	RCHSTTGHVSSRWQR	136	150	PRD000659|22090|
ENSMUSP00000107457	155	WQRVLLPC	148	155	PRD000659|22070|
ENSMUSP00000110767	87	CKVSCRLKCK	24	33	PRD000659|22126|
ENSMUSP00000110767	87	LKCKYSIKNQHALCYK	30	45	PRD000319|16749|
ENSMUSP00000110767	87	NQHALCYKCCDE	38	49	PRD000400|16797|
ENSMUSP00000110767	87	NQHALCYKCCDEITGKGKR	38	56	PRD000659|22117|
ENSMUSP00000110767	87	CCDEITGKGKRVFR	46	59	PRD000659|22118|
ENSMUSP00000110767	87	ASKVKGTIKLRIVKDTCHYAQEL	61	83	PRD000400|16703|
ENSMUSP00000110767	87	VKGTIKLRIVK	64	74	PRD000659|22112|; PRD000659|22113|; PRD000659|22131|
ENSMUSP00000110767	87	IVKDTCHYAQELTAYQ	72	87	PRD000659|22096|
ENSMUSP00000110767	87	DTCHYAQELTAYQ	75	87	PRD000659|22065|; PRD000659|22068|; PRD000659|22116|; PRD000659|22118|; PRD000659|22122|
ENSMUSP00000110908	47	YVEAKVR	22	28	PRD000659|22073|
ENSMUSP00000110908	47	YVEAKVREVK	22	31	PRD000659|22102|
ENSMUSP00000125837	94	RECENHPGGR	7	16	PRD000659|22088|
ENSMUSP00000125837	94	IDICPFIFTFFLSLFK	57	72	PRD000659|22109|
ENSMUSP00000126046	115	LKVVTILLVLFYFLYGLPSSLDQGK	35	59	PRD000127|9794|
ENSMUSP00000126046	115	LHWGPLLKSSSR	60	71	PRD000127|9804|cerebral cortex
ENSMUSP00000126046	115	DIIVR	104	108	PXD000878|37578|cell culture, myotube
ENSMUSP00000130803	464	MMDYKFSSR	1	9	PRD000659|22064|
ENSMUSP00000130803	464	FSSRRRCSSSSRSSLSSR	6	23	PRD000659|22083|
ENSMUSP00000130803	464	GNISNYDNSSTRPSNR	255	270	PRD000659|22074|; PRD000659|22084|; PRD000659|22085|; PRD000659|22086|; PRD000659|22087|; PRD000659|22089|; PRD000659|22093|; PRD000659|22095|; PRD000659|22097|; PRD000659|22112|; PRD000659|22117|; PRD000659|22119|
ENSMUSP00000130803	464	ANISNYGNSSNSSSPQPSSSKISNR	271	295	PRD000400|16786|
ENSMUSP00000130803	464	GNSGPRPSKTGSISSQSNSGPR	379	400	PRD000127|9806|cerebral cortex
ENSMUSP00000130803	464	SSNTDSSSSSSPGNIK	401	416	PRD000127|9819|cerebral cortex
ENSMUSP00000132007	180	VHWSRAATAVAATAKAKR	8	25	PRD000659|22129|
ENSMUSP00000132007	180	AATAVAATAKAKR	13	25	PRD000419|17117|
ENSMUSP00000132007	180	SCGCCHCCCHCCCLHSRPSYR	75	95	PRD000659|22070|
ENSMUSP00000132007	180	SCGCCHCCCHCCCLHSRPSYRK	75	96	PRD000319|16810|
ENSMUSP00000132007	180	KSTFKITKK	96	104	PRD000659|22099|
ENSMUSP00000132007	180	LMQSHLERSQLK	125	136	PRD000659|22085|
ENSMUSP00000135907	94	IPDFAANTRLLIMSFGR	50	66	PRD000659|22064|
ENSMUSP00000135907	94	GPLCLVMVPMF	84	94	PRD000659|22064|; PRD000659|22071|; PRD000659|22079|; PRD000659|22080|; PRD000659|22087|; PRD000659|22101|; PRD000659|22103|; PRD000659|22104|; PRD000659|22106|; PRD000659|22108|; PRD000659|22111|; PRD000659|22113|; PRD000659|22115|; PRD000659|22119|; PRD000659|22123|; PRD000659|22129|
ENSMUSP00000136256	101	RALEAQLLQPCMEAVCR	54	70	PRD000659|22100|; PRD000659|22108|
ENSMUSP00000136256	101	ALEAQLLQPCMEAVCR	55	70	PRD000659|22076|; PRD000659|22123|
ENSMUSP00000136256	101	ALEAQLLQPCMEAVCRKHR	55	73	PRD000659|22097|
ENSMUSP00000136256	101	QPPFLSICRAICIALTFQFK	77	96	PRD000127|9809|cerebral cortex
ENSMUSP00000136256	101	SICRAICIALTFQF	82	95	PRD000400|16696|
ENSMUSP00000136256	101	AICIALTFQFK	86	96	PRD000659|22058|; PRD000659|22074|; PRD000659|22091|; PRD000659|22127|
ENSMUSP00000136609	161	FSTDFHLALIKIK	108	120	PRD000055|3534|erythroid lineage cell
ENSMUSP00000136788	101	HTVPSSTHLQSGTEGGLSFGQCPPPQSTHWESRK	19	52	PRD000127|9786|
ENSMUSP00000136788	101	LAEHPPARNPACAPGPFGSPQVLALQK	56	82	PRD000127|9787|; PRD000127|9796|; PRD000127|9819|cerebral cortex
ENSMUSP00000137274	87	TPKPTAYARATSKPK	8	22	PRD000659|22064|
ENSMUSP00000137274	87	CKASCRLKCK	24	33	PRD000659|22086|
ENSMUSP00000137274	87	LKCKYSIKNQHALCCK	30	45	PRD000659|22114|
ENSMUSP00000137274	87	NQHALCCKSCGE	38	49	PRD000419|17116|
ENSMUSP00000137274	87	VFQLASKVKGTIKLRIVK	57	74	PRD000400|16798|
ENSMUSP00000137274	87	ASKVKGTIKLRIVKDTCHYAQEL	61	83	PRD000400|16703|
ENSMUSP00000137274	87	VKGTIKLRIVK	64	74	PRD000659|22112|; PRD000659|22113|; PRD000659|22131|
ENSMUSP00000137274	87	IVKDTCHYAQELTAYQ	72	87	PRD000659|22096|
ENSMUSP00000137274	87	DTCHYAQELTAYQ	75	87	PRD000659|22065|; PRD000659|22068|; PRD000659|22116|; PRD000659|22118|; PRD000659|22122|
ENSMUSP00000137308	154	MNENKENNENK	1	11	PXD000729|34645|acute leukemia, B cell
ENSMUSP00000137513	102	MAPHIVHR	1	8	PRD000127|9786|; PRD000127|9787|; PRD000127|9789|; PRD000127|9790|
ENSMUSP00000137513	102	MAPHIVHRGLKRK	1	13	PRD000659|22101|
ENSMUSP00000137513	102	KLLVVIYSLLPR	13	24	PRD000127|9802|cerebral cortex; PRD000659|22060|
ENSMUSP00000137513	102	YFCLWILCFLDYSSFSR	67	83	PRD000659|22074|
ENSMUSP00000137513	102	YFCLWILCFLDYSSFSRLNR	67	86	PRD000127|9800|cerebral cortex
ENSMUSP00000137513	102	NPLGYTTKVAS	92	102	PRD000319|16811|; PRD000659|22058|; PRD000659|22067|; PRD000659|22076|; PRD000659|22078|; PRD000659|22079|; PRD000659|22080|; PRD000659|22087|; PRD000659|22090|; PRD000659|22092|; PRD000659|22093|; PRD000659|22095|; PRD000659|22109|; PRD000659|22113|; PRD000659|22119|
ENSMUSP00000137551	184	EHPGALAGTQAELREAEFEQR	61	81	PRD000127|9786|
ENSMUSP00000137551	184	LSICGGEDTK	82	91	PRD000659|22109|
ENSMUSP00000137551	184	ETSECLLFPCNANRIPK	150	166	PRD000659|22060|
ENSMUSP00000137551	184	IPKVHTGVFFSLHILDR	164	180	PRD000127|9819|cerebral cortex
ENSMUSP00000140288	138	PTVVCCCRRSCCRSCGCGSCGCGCGCGCGK	89	118	PRD000400|16727|
ENSMUSP00000140288	138	RSCCRSCGCGSCGCGCGCGCGK	97	118	PRD000400|16769|; PRD000659|22066|; PRD000659|22098|; PRD000659|22100|; PRD000659|22103|; PRD000659|22104|
ENSMUSP00000140288	138	RSCCRSCGCGSCGCGCGCGCGKGCCQQK	97	124	PRD000659|22092|
ENSMUSP00000140288	138	SCCRSCGCGSCGCGCGCGCGK	98	118	PRD000319|16810|; PRD000659|22109|; PRD000659|22119|
ENSMUSP00000140288	138	SCCRSCGCGSCGCGCGCGCGKGCCQQK	98	124	PRD000319|16810|; PRD000400|16814|
ENSMUSP00000140288	138	SCGCGSCGCGCGCGCGKGCCQQK	102	124	PRD000319|16811|
ENSMUSP00000140288	138	GCCQQKCCCQQKCGCKKCCC	119	138	PRD000319|16749|; PRD000659|22120|
ENSMUSP00000140288	138	CCCQQKCGCKKCCC	125	138	PRD000659|22086|; PRD000659|22106|; PRD000659|22107|; PRD000659|22126|

## Sheet: ENCODE Accession numbers
Accession numbers of the raw read files of 135 strand-specific paired-end RNA-Seq samples
File accession	Paired file accession	Experiment accession
ENCFF001IJF	ENCFF001IJL	ENCSR000BYX
ENCFF001IJI	ENCFF001IJO	ENCSR000BYX
ENCFF001IJG	ENCFF001IJM	ENCSR000BYX
ENCFF001IJH	ENCFF001IJN	ENCSR000BYX
ENCFF001IJJ	ENCFF001IJP	ENCSR000BYX
ENCFF001IJK	ENCFF001IJQ	ENCSR000BYX
ENCFF001JTI	ENCFF001JTW	ENCSR000BZJ
ENCFF001JTM	ENCFF001JWN	ENCSR000BZJ
ENCFF001ING	ENCFF001INO	ENCSR000BZG
ENCFF001INH	ENCFF001INP	ENCSR000BZG
ENCFF001IOY	ENCFF001IPI	ENCSR000BZL
ENCFF001IQT	ENCFF001IQS	ENCSR000BZL
ENCFF001IOG	ENCFF001IOH	ENCSR000BZK
ENCFF001IOO	ENCFF001ION	ENCSR000BZK
ENCFF001IMG	ENCFF001IMN	ENCSR000BZM
ENCFF001IMH	ENCFF001IMO	ENCSR000BZM
ENCFF001IPQ	ENCFF001IPW	ENCSR000BYP
ENCFF001IPT	ENCFF001IPZ	ENCSR000BYP
ENCFF001IPR	ENCFF001IPX	ENCSR000BYP
ENCFF001IPS	ENCFF001IPY	ENCSR000BYP
ENCFF001IPU	ENCFF001IQA	ENCSR000BYP
ENCFF001IPV	ENCFF001IQB	ENCSR000BYP
ENCFF001IRR	ENCFF001ITK	ENCSR000BZR
ENCFF001IRS	ENCFF001IRQ	ENCSR000BZR
ENCFF001IRZ	ENCFF001ISG	ENCSR000BYY
ENCFF001ISC	ENCFF001ISJ	ENCSR000BYY
ENCFF001ISA	ENCFF001ISH	ENCSR000BYY
ENCFF001ISB	ENCFF001ISI	ENCSR000BYY
ENCFF001ISD	ENCFF001ISK	ENCSR000BYY
ENCFF001ISE	ENCFF001ISL	ENCSR000BYY
ENCFF001ISF	ENCFF001ISM	ENCSR000BYY
ENCFF001JHO	ENCFF001JHZ	ENCSR000BZC
ENCFF001JHU	ENCFF001JIE	ENCSR000BZC
ENCFF001JHQ	ENCFF001JIA	ENCSR000BZC
ENCFF001JHR	ENCFF001JIB	ENCSR000BZC
ENCFF001JHS	ENCFF001JIC	ENCSR000BZC
ENCFF001JHT	ENCFF001JID	ENCSR000BZC
ENCFF001JHV	ENCFF001JIF	ENCSR000BZC
ENCFF001JHW	ENCFF001JIG	ENCSR000BZC
ENCFF001JHX	ENCFF001JIH	ENCSR000BZC
ENCFF001JHY	ENCFF001JII	ENCSR000BZC
ENCFF002EZU	ENCFF002EZV	ENCSR723SZV
ENCFF002FAE	ENCFF002FAF	ENCSR723SZV
ENCFF001ITW	ENCFF001IVK	ENCSR000BZS
ENCFF001IUD	ENCFF001IUF	ENCSR000BZS
ENCFF001IUL	ENCFF001IUP	ENCSR000BYZ
ENCFF001IUN	ENCFF001IUR	ENCSR000BYZ
ENCFF001IUM	ENCFF001IUQ	ENCSR000BYZ
ENCFF001IUO	ENCFF001IUS	ENCSR000BYZ
ENCFF002FAA	ENCFF002FAB	ENCSR035DLJ
ENCFF002FAC	ENCFF002FAD	ENCSR035DLJ
ENCFF001IVS	ENCFF001IVW	ENCSR000BYQ
ENCFF001IVU	ENCFF001IVY	ENCSR000BYQ
ENCFF001IVT	ENCFF001IVX	ENCSR000BYQ
ENCFF001IVV	ENCFF001IVZ	ENCSR000BYQ
ENCFF002EZW	ENCFF002EZX	ENCSR749BAG
ENCFF002EZY	ENCFF002EZZ	ENCSR749BAG
ENCFF001IWX	ENCFF001IXD	ENCSR000BYR
ENCFF001IXA	ENCFF001IXG	ENCSR000BYR
ENCFF001IWY	ENCFF001IXE	ENCSR000BYR
ENCFF001IWZ	ENCFF001IXF	ENCSR000BYR
ENCFF001IXB	ENCFF001IXH	ENCSR000BYR
ENCFF001IXC	ENCFF001IXI	ENCSR000BYR
ENCFF001IYI	ENCFF001IYM	ENCSR000BZA
ENCFF001IYK	ENCFF001IYO	ENCSR000BZA
ENCFF001IYJ	ENCFF001IYN	ENCSR000BZA
ENCFF001IYL	ENCFF001IYP	ENCSR000BZA
ENCFF001JAE	ENCFF001JBW	ENCSR000BZN
ENCFF001JAF	ENCFF001JAG	ENCSR000BZN
ENCFF001JEO	ENCFF001JFQ	ENCSR000BZO
ENCFF001JEP	ENCFF001JGX	ENCSR000BZO
ENCFF001JDO	ENCFF001JDW	ENCSR000BZI
ENCFF001JDP	ENCFF001JDV	ENCSR000BZI
ENCFF001JBY	ENCFF001JCJ	ENCSR000BZH
ENCFF001JCV	ENCFF001JCY	ENCSR000BZH
ENCFF001JAN	ENCFF001JAT	ENCSR000BYS
ENCFF001JAQ	ENCFF001JAW	ENCSR000BYS
ENCFF001JAO	ENCFF001JAU	ENCSR000BYS
ENCFF001JAP	ENCFF001JAV	ENCSR000BYS
ENCFF001JAR	ENCFF001JAX	ENCSR000BYS
ENCFF001JAS	ENCFF001JAY	ENCSR000BYS
ENCFF001RTN	ENCFF001RTM	ENCSR000AJU
ENCFF001RTD	ENCFF001RTA	ENCSR000AJU
ENCFF001JEX	ENCFF001JFB	ENCSR000BYT
ENCFF001JEZ	ENCFF001JFD	ENCSR000BYT
ENCFF001JEY	ENCFF001JFC	ENCSR000BYT
ENCFF001JFA	ENCFF001JFE	ENCSR000BYT
ENCFF001JGE	ENCFF001JGK	ENCSR000BZB
ENCFF001JGH	ENCFF001JGN	ENCSR000BZB
ENCFF001JGF	ENCFF001JGL	ENCSR000BZB
ENCFF001JGG	ENCFF001JGM	ENCSR000BZB
ENCFF001JGI	ENCFF001JGO	ENCSR000BZB
ENCFF001JGJ	ENCFF001JGP	ENCSR000BZB
ENCFF002FAG	ENCFF002FAH	ENCSR255SDF
ENCFF002FAI	ENCFF002FAJ	ENCSR255SDF
ENCFF001JJW	ENCFF001JND	ENCSR000BZP
ENCFF001JJX	ENCFF001JJY	ENCSR000BZP
ENCFF001JLL	ENCFF001JLV	ENCSR000BZD
ENCFF001JLQ	ENCFF001JMA	ENCSR000BZD
ENCFF001JLM	ENCFF001JLW	ENCSR000BZD
ENCFF001JLN	ENCFF001JLX	ENCSR000BZD
ENCFF001JLO	ENCFF001JLY	ENCSR000BZD
ENCFF001JLP	ENCFF001JLZ	ENCSR000BZD
ENCFF001JLR	ENCFF001JMB	ENCSR000BZD
ENCFF001JLS	ENCFF001JMC	ENCSR000BZD
ENCFF001JLT	ENCFF001JMD	ENCSR000BZD
ENCFF001JLU	ENCFF001JME	ENCSR000BZD
ENCFF001JNH	ENCFF001JNN	ENCSR000BYU
ENCFF001JNK	ENCFF001JNQ	ENCSR000BYU
ENCFF001JNI	ENCFF001JNO	ENCSR000BYU
ENCFF001JNJ	ENCFF001JNP	ENCSR000BYU
ENCFF001JNL	ENCFF001JNR	ENCSR000BYU
ENCFF001JNM	ENCFF001JNS	ENCSR000BYU
ENCFF001JON	ENCFF001JOT	ENCSR000BZE
ENCFF001JOQ	ENCFF001JOW	ENCSR000BZE
ENCFF001JOO	ENCFF001JOU	ENCSR000BZE
ENCFF001JOP	ENCFF001JOV	ENCSR000BZE
ENCFF001JOR	ENCFF001JOX	ENCSR000BZE
ENCFF001JOS	ENCFF001JOY	ENCSR000BZE
ENCFF001JKF	ENCFF001JKJ	ENCSR000BZF
ENCFF001JKH	ENCFF001JKL	ENCSR000BZF
ENCFF001JKG	ENCFF001JKK	ENCSR000BZF
ENCFF001JKI	ENCFF001JKM	ENCSR000BZF
ENCFF001JPX	ENCFF001JQB	ENCSR000BYW
ENCFF001JPZ	ENCFF001JQD	ENCSR000BYW
ENCFF001JPY	ENCFF001JQC	ENCSR000BYW
ENCFF001JQA	ENCFF001JQE	ENCSR000BYW
ENCFF001JRD	ENCFF001JRJ	ENCSR000BYV
ENCFF001JRG	ENCFF001JRM	ENCSR000BYV
ENCFF001JRE	ENCFF001JRK	ENCSR000BYV
ENCFF001JRF	ENCFF001JRL	ENCSR000BYV
ENCFF001JRH	ENCFF001JRN	ENCSR000BYV
ENCFF001JRI	ENCFF001JRO	ENCSR000BYV
ENCFF001ILH	ENCFF001ILQ	ENCSR000BZQ
ENCFF001ILI	ENCFF001ILG	ENCSR000BZQ
