# Supplementary material for: A de novo evolved gene in the house mouse regulates female pregnancy cycles
Source: eLife. 2019 Aug 22;8:e44392. doi: 10.7554/eLife.44392 (PMC6760900; doi:10.7554/eLife.44392)
Supplement: Figure 5—source data 1. — The mice listed under the UC codes are part of the standard stock breeding, the mice listed under the WT and KO codes were specifically set up to confirm the observations from the stock breeding. [file elife-44392-fig5-data1.xlsx]

## Sheet: fertility scores
Fertility scores
Codea	Female		Male		1st litter		2nd litter		Total		Note
	Genotypeb	Agec	Genotypeb	Agec	Timed	Numbere	Timed	Numbere	Timed	Numbere
UC1	HET	8	HET	8	23	7	37	12	60	19
UC2	HET	9	HET	9	20	8	37	9	57	17
UC3	WT	9	KO	9	21	7	24	4	45	11
UC4	KO	8	KO	8	49	7	21	3	70	10
UC5	KO	14	KO	8	19	4	40	10	59	14
UC6	HET	9	KO	21	22	10	24	2	46	12
UC7	HET	9	KO	21	22	6	47	11	69	17
UC8	HET	9	KO	26	24	5	43	6	67	11
UC9	HET	9	KO	26	25	3	22	3	47	6
UC10	HET	9	WT	26	22	7	49	11	71	18
UC11	KO	8	KO	8	39	6	23	NA	62	NA	2nd litter was eaten later
UC12	KO	8	KO	8	21	7	25	NA	46	NA	2nd litter was eaten later
UC13	KO	8	KO	8	23	5	23	4	46	9
UC14	WT	9	WT	8	21	7	39	10	60	17
UC15	WT	9	WT	8	24	10	49	10	73	20
UC16	KO	9	KO	9	22	4	22	3	44	7
KO1	KO	9	WT	9	21	4	22	8	43	12
KO2	KO	9	WT	9	21	6	24	1	45	7
KO3	KO	8	WT	8	20	7	22	8	42	15
KO4	KO	8	WT	8	23	3	19	9	42	12
KO5	KO	8	WT	8	20	9	40	8	60	17
KO6	KO	8	WT	8	24	1	42	5	66	6
KO7	KO	8	WT	8	35	9	39	10	74	19
KO8	KO	8	WT	9	24	8	22	2	46	10	2nd litter was eaten later
KO9	KO	8	WT	9	23	8	37	10	60	18
KO10	KO	8	WT	9	35	9	23	1	58	10	2nd litter was eaten later
WT1	WT	9	WT	9	20	7	48	5	68	12
WT2	WT	8	WT	8	44	8	20	6	64	14
WT3	WT	9	WT	8	31	6	36	9	67	15
WT4	WT	9	WT	9	22	7	23	7	45	14
WT5	WT	8	WT	8	20	6	24	4	44	10
WT6	WT	8	WT	8	22	2	22	3	44	5
WT7	WT	8	WT	8	27	7	47	5	74	12
WT8	WT	8	WT	9	20	5	37	9	57	14
WT9	WT	8	WT	9	24	9	40	8	64	17
WT10	WT	8	WT	9	21	3	35	9	56	12
aUC: uncontrolled mating; KO: controlled mating and knockout female; WT: controlled mating and wildtype female.
bKO: homozygous knockout; HET: heterozygous knockout; WT: wildtype.
cThe age (weeks) of the animal when the mating was starting.
dThe time (days) having the 1st litter, 2nd litter, or total two litters after mating.
eThe number of pups.
