# Supplementary material for: A de novo evolved gene in the house mouse regulates female pregnancy cycles
Source: eLife journal article supplement (doi:10.7554/elife.44392), 2019-08-22

**Figure 4-figure supplement 3.** Deletion patterns in the *Dcpp* region (red represents under-representation in read counts).

Window position

Mouse Dec. 2011 (GRCm38/mm10) chr17:23,873,933-23,933,343 (59,411 bp)

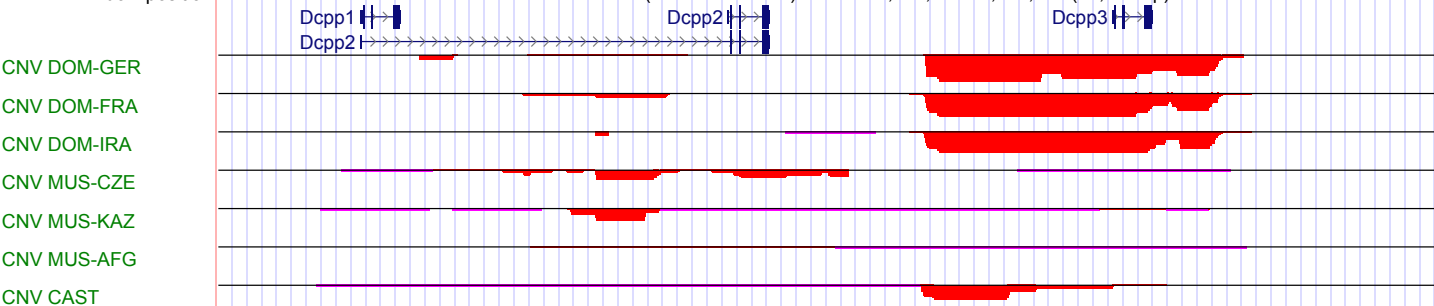

Supplement: supp [file elife-44392-supp-v1.zip]
