# Supplementary material for: A de novo evolved gene in the house mouse regulates female pregnancy cycles
Source: eLife journal article supplement (doi:10.7554/elife.44392), 2019-08-22
Supplement: supp [file elife-44392-supp-v1.zip]

**Figure 3 - figure supplement 2: Distance matrices for whole genome comparisons and gene comparisons**

**Mean distances of whole genomes (from 10,000 25kb windows)**

| MEAN | AFG        | CAS        | CZE        | FRA        | GER        | IRA        | KAZ        | MAT        | SPI        | SPR        |
|------|------------|------------|------------|------------|------------|------------|------------|------------|------------|------------|
| AFG  | 0          | 0.00541086 | 0.00166811 | 0.00782105 | 0.00782785 | 0.00739552 | 0.00130151 | 0.06324006 | 0.01503435 | 0.01568621 |
| CAS  | 0.00541086 | 0          | 0.00563758 | 0.00566411 | 0.00567391 | 0.00519473 | 0.0055197  | 0.06144667 | 0.01308614 | 0.01373323 |
| CZE  | 0.00166811 | 0.00563758 | 0          | 0.00793853 | 0.00794452 | 0.00752934 | 0.00149276 | 0.06342217 | 0.01523522 | 0.01588459 |
| FRA  | 0.00782105 | 0.00566411 | 0.00793853 | 0          | 0.00175979 | 0.00202539 | 0.00792647 | 0.06303092 | 0.01492818 | 0.01559957 |
| GER  | 0.00782785 | 0.00567391 | 0.00794452 | 0.00175979 | 0          | 0.00204749 | 0.00793534 | 0.06300955 | 0.01492032 | 0.0156008  |
| IRA  | 0.00739552 | 0.00519473 | 0.00752934 | 0.00202539 | 0.00204749 | 0          | 0.00750167 | 0.06264982 | 0.01451421 | 0.01519135 |
| KAZ  | 0.00130151 | 0.0055197  | 0.00149276 | 0.00792647 | 0.00793534 | 0.00750167 | 0          | 0.06333035 | 0.01512862 | 0.01577962 |
| MAT  | 0.06324006 | 0.06144667 | 0.06342217 | 0.06303092 | 0.06300955 | 0.06264982 | 0.06333035 | 0          | 0.06380344 | 0.06413239 |
| SPI  | 0.01503435 | 0.01308614 | 0.01523522 | 0.01492818 | 0.01492032 | 0.01451421 | 0.01512862 | 0.06380344 | 0          | 0.01336037 |
| SPR  | 0.01568621 | 0.01373323 | 0.01588459 | 0.01559957 | 0.0156008  | 0.01519135 | 0.01577962 | 0.06413239 | 0.01336037 | 0          |

**Expected substitutions for the Gm13030 reading frame**

| MEAN | AFG | CAS | CZE | FRA | GER | IRA | KAZ | MAT | SPI | SPR |
|------|-----|-----|-----|-----|-----|-----|-----|-----|-----|-----|
| AFG  | 0   | 2   | 1   | 3   | 3   | 3   | 1   | 27  | 6   | 7   |
| CAS  | 2   | 0   | 2   | 2   | 2   | 2   | 2   | 26  | 6   | 6   |
| CZE  | 1   | 2   | 0   | 3   | 3   | 3   | 1   | 27  | 7   | 7   |
| FRA  | 3   | 2   | 3   | 0   | 1   | 1   | 3   | 27  | 6   | 7   |
| GER  | 3   | 2   | 3   | 1   | 0   | 1   | 3   | 27  | 6   | 7   |
| IRA  | 3   | 2   | 3   | 1   | 1   | 0   | 3   | 27  | 6   | 7   |
| KAZ  | 1   | 2   | 1   | 3   | 3   | 3   | 0   | 27  | 7   | 7   |
| MAT  | 27  | 26  | 27  | 27  | 27  | 27  | 27  | 0   | 27  | 28  |
| SPI  | 6   | 6   | 7   | 6   | 6   | 6   | 7   | 27  | 0   | 6   |
| SPR  | 7   | 6   | 7   | 7   | 7   | 7   | 7   | 28  | 6   | 0   |
