# Supplementary material for: A de novo evolved gene in the house mouse regulates female pregnancy cycles
Source: eLife journal article supplement (doi:10.7554/elife.44392), 2019-08-22
Supplement: supp [file elife-44392-supp-v1.zip]

**Figure 3-figure supplement 3: Table for all pairwise comparisons of the aligned reading frame of *Gm13030***

| Seq 1   | Seq 2        | SynDif | SynPos | Ks     | NSynDif | NSynPos | Ka     | P-value (two-tailed Fisher's exact test) |
|---------|--------------|--------|--------|--------|---------|---------|--------|------------------------------------------|
| Mmm CZE | Mmm KAZ      | 1      | 98.50  | 0.0102 | 3       | 312.5   | 0.0097 | 1                                        |
| Mmm CZE | Mmm AFG      | 0      | 98.00  | 0      | 1       | 313     | 0.0032 | 1                                        |
| Mmm CZE | Mmc TAI      | 0      | 97.75  | 0      | 2       | 313.25  | 0.0064 | 1                                        |
| Mmm CZE | Mmd FRA      | 1      | 97.67  | 0.0103 | 7       | 313.33  | 0.0227 | 0.68                                     |
| Mmm CZE | Mmd GER      | 1      | 97.67  | 0.0103 | 7       | 313.33  | 0.0227 | 0.68                                     |
| Mmm CZE | Mmd IRA      | 1      | 97.67  | 0.0103 | 7       | 313.33  | 0.0227 | 0.68                                     |
| Mmm CZE | Mspretus     | 4      | 97.58  | 0.0422 | 10      | 313.42  | 0.0326 | 0.75                                     |
| Mmm CZE | Mspicileguss | 3      | 98.42  | 0.0311 | 6       | 312.58  | 0.0194 | 0.69                                     |
| Mmm KAZ | Mmm AFG      | 1      | 98.83  | 0.0102 | 2       | 312.17  | 0.0064 | 1                                        |
| Mmm KAZ | Mmc TAI      | 1      | 98.58  | 0.0102 | 3       | 312.42  | 0.0097 | 1                                        |
| Mmm KAZ | Mmd FRA      | 0      | 98.50  | 0      | 6       | 312.5   | 0.0195 | 1                                        |
| Mmm KAZ | Mmd GER      | 0      | 98.50  | 0      | 6       | 312.5   | 0.0195 | 1                                        |
| Mmm KAZ | Mmd IRA      | 0      | 98.50  | 0      | 6       | 312.5   | 0.0195 | 1                                        |
| Mmm KAZ | Mspretus     | 3      | 98.42  | 0.0311 | 7       | 312.58  | 0.0227 | 0.71                                     |
| Mmm KAZ | Mspicilegus  | 2      | 99.25  | 0.0204 | 3       | 311.75  | 0.0097 | 0.6                                      |
| Mmm AFG | Mmc TAI      | 0      | 98.08  | 0      | 1       | 312.92  | 0.0032 | 1                                        |
| Mmm AFG | Mmd FRA      | 1      | 98.00  | 0.0103 | 8       | 313     | 0.026  | 0.47                                     |
| Mmm AFG | Mmd GER      | 1      | 98.00  | 0.0103 | 8       | 313     | 0.026  | 0.47                                     |
| Mmm AFG | Mmd IRA      | 1      | 98.00  | 0.0103 | 8       | 313     | 0.026  | 0.47                                     |
| Mmm AFG | Mspretus     | 4      | 97.92  | 0.042  | 9       | 313.08  | 0.0293 | 0.74                                     |
| Mmm AFG | Mspicilegus  | 3      | 98.75  | 0.031  | 5       | 312.25  | 0.0162 | 0.41                                     |
| Mmc TAI | Mmd FRA      | 1      | 97.75  | 0.0103 | 7       | 313.25  | 0.0227 | 0.69                                     |
| Mmc TAI | Mmd GER      | 1      | 97.75  | 0.0103 | 7       | 313.25  | 0.0227 | 0.69                                     |
| Mmc TAI | Mmd IRA      | 1      | 97.75  | 0.0103 | 7       | 313.25  | 0.0227 | 0.69                                     |
| Mmc TAI | Mspretus     | 4      | 97.67  | 0.0421 | 8       | 313.33  | 0.026  | 0.49                                     |
| Mmc TAI | Mspicilegus  | 3      | 98.50  | 0.0311 | 4       | 312.5   | 0.0129 | 0.37                                     |
| Mmd FRA | Mmd GER      | 0      | 97.67  | 0      | 0       | 313.33  | 0      | 1                                        |
| Mmd FRA | Mmd IRA      | 0      | 97.67  | 0      | 0       | 313.33  | 0      | 1                                        |
| Mmd FRA | Mspretus     | 3      | 97.58  | 0.0314 | 7       | 313.42  | 0.0227 | 0.71                                     |
| Mmd FRA | Mspicilegus  | 2      | 98.42  | 0.0206 | 7       | 312.58  | 0.0227 | 1                                        |
| Mmd GER | Mmd IRA      | 0      | 97.67  | 0      | 0       | 313.33  | 0      | 1                                        |
| Mmd GER | Mspretus     | 3      | 97.58  | 0.0314 | 7       | 313.42  | 0.0227 | 0.71                                     |
| Mmd GER | Mspicilegus  | 2      | 98.42  | 0.0206 | 7       | 312.58  | 0.0227 | 1                                        |
| Mmd IRA | Mspretus     | 3      | 97.58  | 0.0314 | 7       | 313.42  | 0.0227 | 0.71                                     |
| Mmd IRA | Mspicilegus  | 2      | 98.42  | 0.0206 | 7       | 312.58  | 0.0227 | 1                                        |
