# Supplementary material for: A de novo evolved gene in the house mouse regulates female pregnancy cycles
Source: eLife journal article supplement (doi:10.7554/elife.44392), 2019-08-22
Supplement: supp [file elife_poa_e44392_Figure_4_figure_supplement_1.docx]

**Figure 4 - figure supplement 1.** Oviduct sample details and read statistics.

| **Code** | **Genotype** | **Unique mapped reads** | **Reads supporting WT allele** | **Reads supporting KO allele** | **Cluster assignment** |
| --- | --- | --- | --- | --- | --- |
| 1 | KO | 80394779 | 0 | 3 | 3 |
| 2 | KO | 75781419 | 0 | 11 | 2 |
| 3 | KO | 93024906 | 0 | 2 | 3 |
| 4 | KO | 77259110 | 0 | 6 | 1 |
| 5 | KO | 58799054 | 0 | 4 | 1 |
| 8 | KO | 76578481 | 0 | 4 | 1 |
| 9 | KO | 80797137 | 0 | 8 | 2 |
| 16 | KO | 77183782 | 0 | 3 | 2 |
| 17 | KO | 62735830 | 0 | 1 | 2 |
| 18 | KO | 57457879 | 0 | 1 | 3 |
| 23 | KO | 72105148 | 0 | 5 | 2 |
| 24 | KO | 69664805 | 0 | 0 | 3 |
| 6 | WT | 90258057 | 6 | 0 | 1 |
| 7 | WT | 75968181 | 10 | 0 | 3 |
| 10 | WT | 74174974 | 6 | 0 | 3 |
| 11 | WT | 86416106 | 8 | 0 | 1 |
| 12 | WT | 69557947 | 3 | 0 | 3 |
| 13 | WT | 72062165 | 6 | 0 | 2 |
| 14 | WT | 88656428 | 16 | 0 | 2 |
| 15 | WT | 78677825 | 12 | 0 | 3 |
| 19 | WT | 73062856 | 13 | 0 | 2 |
| 20 | WT | 68125659 | 8 | 0 | 2 |
| 21 | WT | 71032865 | 8 | 0 | 3 |
| 22 | WT | 92740221 | 7 | 0 | 1 |
