# Supplementary material for: A de novo evolved gene in the house mouse regulates female pregnancy cycles
Source: eLife journal article supplement (doi:10.7554/elife.44392), 2019-08-22
Supplement: supp [file elife_poa_e44392_Figure_4_figure_supplement_2.docx]

**Figure 4-figure supplement 2**. *Dcpp* expression confirmation.

The relative expression levels of three *Dcpp* genes in cluster 1 samples. Comparison of RNA-Seq counts and two replicates of ddPCR experiments (see experimental details in the method section). Note that the three *Dcpp* genes (*Dcpp1*, *Dcpp2*, and *Dcpp3*) are too similar to each other to allow to place primers that could distinguish them. Hence, both the RNA-Seq counts, as well as the ddPCR results reflect the cumulative expression levels.

| **Samplea** | **Genotype** | **Cluster** | **RNA-Seqb** | **ddPCR replicate 1c** | **ddPCR replicate 2c** |
| --- | --- | --- | --- | --- | --- |
| 4 | KO | 1 | 0.460 | 3.05 | 3.25 |
| 5 | KO | 1 | 0.483 | 2.53 | 2.89 |
| 8 | KO | 1 | 0.457 | 2.69 | 3.35 |
| 6 | WT | 1 | 0.268 | 1.25 | 1.29 |
| 11 | WT | 1 | 0.263 | 1.23 | 1.36 |
| 22 | WT | 1 | 0.282 | 1.41 | 1.35 |

aSample numbers correspond to the sample numbers of cluster 1 in the cluster analysis shown in Figure 4.

bThe relative expression level of three *Dcpp* genes (*Dcpp1*, *Dcpp2*, and *Dcpp3*). RNA-Seq: the sum of the normalized counts of three *Dcpp* genes divided by the normalized count of *Uba1*.

cddPCR replicate 1 and ddPCR replicate 2: the concentration of three *Dcpp* genes divided by the concentration of the reference gene *Uba1,* measured by ddPCR (technical replicates).
