# Supplementary figures and images for: A de novo evolved gene in the house mouse regulates female pregnancy cycles
Source: eLife journal article supplement (doi:10.7554/elife.44392), 2019-08-22

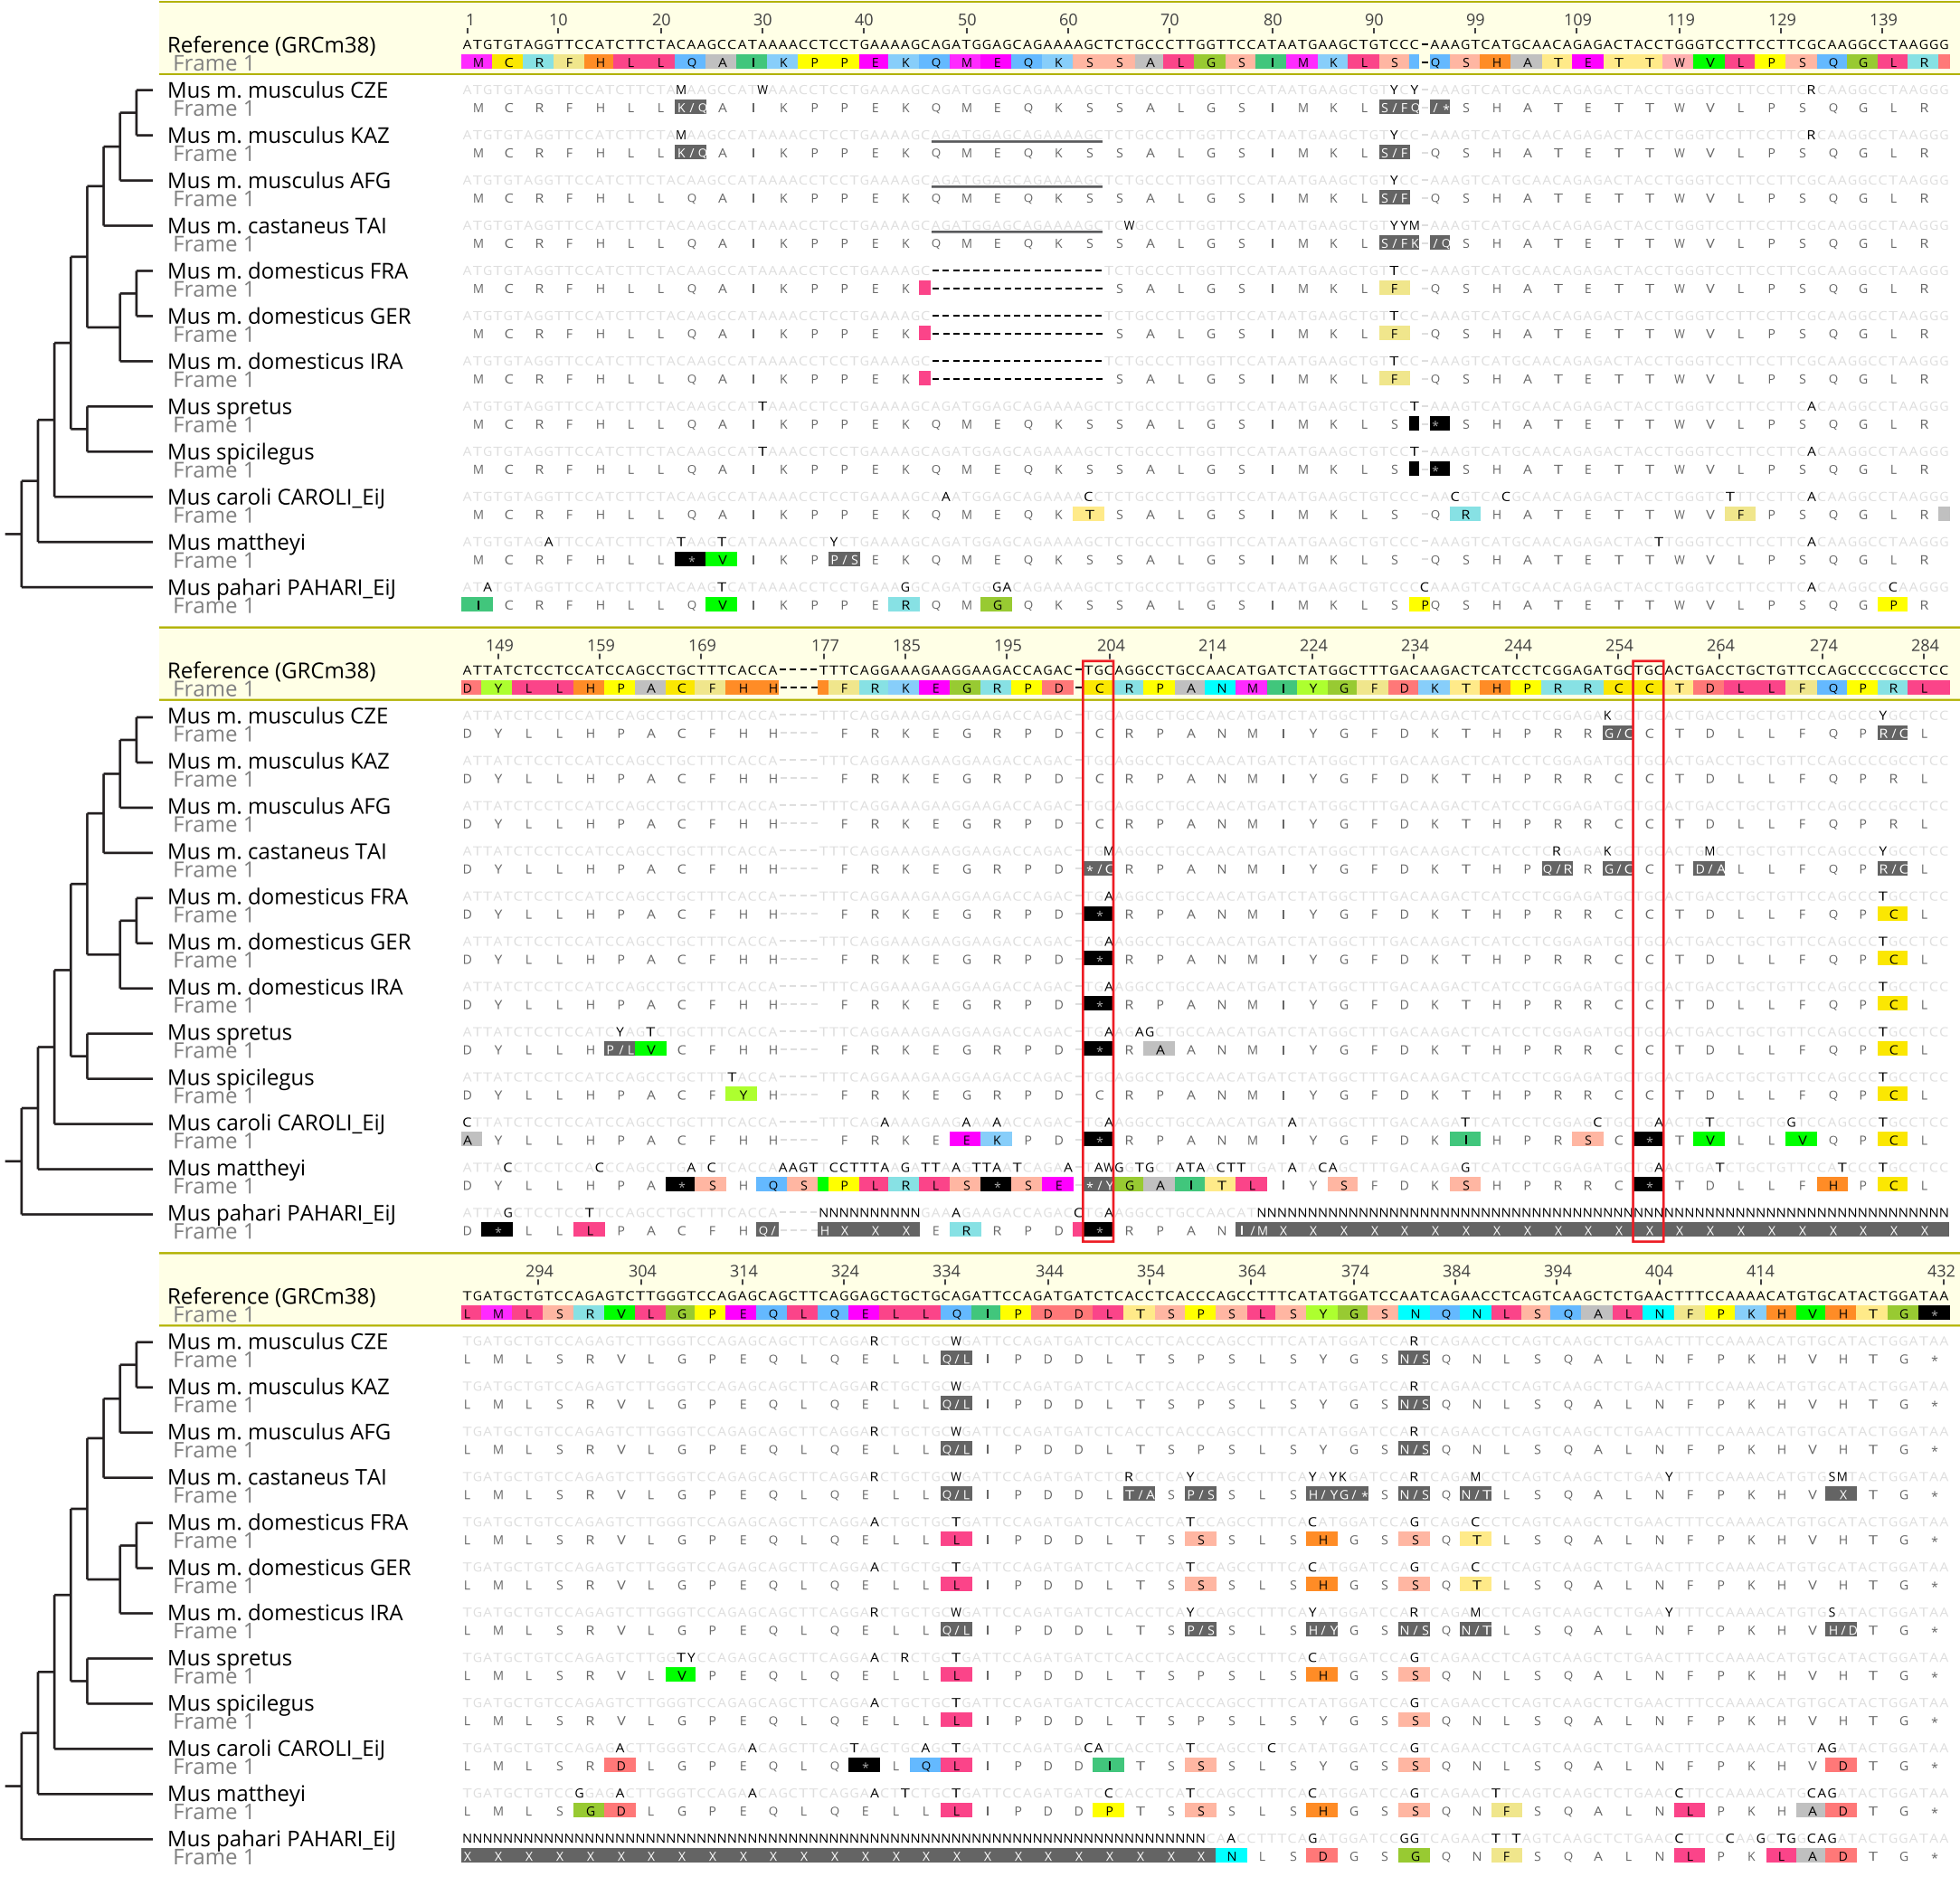

Supplement: supp [file elife-44392-supp-v1.zip]
